# Supplementary material
Source: PubMed Central journal article supplement (PMC3087841)
Supplement: NIHMS266454-supplement-1_si_001.pdf [file NIHMS266454-supplement-1_si_001.pdf]

# Mechanistic Studies of Wacker-type Intramolecular Aerobic Oxidative Amination of Alkenes Catalyzed by $\text{Pd}(\text{OAc})_2/\text{Pyridine}$

*Xuan Ye, Guosheng Liu, Brian V. Popp, and Shannon S. Stahl\**

Department of Chemistry, University of Wisconsin-Madison, 1101 University Avenue, Madison,  
Wisconsin 53706

| <b>Table of Contents</b>                                                                           | <b>Pages</b> |
|----------------------------------------------------------------------------------------------------|--------------|
| General considerations                                                                             | S2           |
| Representative procedure for crossover experiments                                                 | S2-S3        |
| Catalytic reaction monitored by $^1\text{H}$ NMR spectroscopy                                      | S4           |
| NMR spectral timecourse for the oxidative amination of (Z)-4-hexenyltosylamide                     | S5           |
| Mathematical derivation of the rate law based on mechanism in Scheme 5                             | S6-S8        |
| Computational studies of Pd-amidate formation                                                      | S9-S11       |
| Analysis of natural charges (NC) of alkene insertion transition state                              | S12          |
| Total energies, thermochemical analysis, and three lowest frequencies from<br>normal mode analysis | S13-S15      |
| Ball-and-stick models of various [4,5]- and [6,5]-transition states for <i>cis</i> -AP             | S16-S19      |
| Cartesian coordinates for optimized complexes                                                      | S20-S73      |
| References                                                                                         | S74          |
| Copies of NMR spectra for new compounds                                                            | S75-S86      |

### **General Considerations.**

All commercially available compounds were purchased and used as received.  $^1\text{H}$  and  $^{13}\text{C}$  NMR spectra were recorded on AC-300 MHz spectrometers.  $^2\text{H}$  NMR spectra were recorded on 500 MHz spectrometers. The chemical shifts ( $\delta$ ) are given in part per million relative to TMS (0 ppm for  $^1\text{H}$ , and 0 ppm for  $^{13}\text{C}$ ). Flash chromatography was performed on silica gel 60 (particle size 0.040-0.063 mm, 230-400 mesh ASRM) with hexanes/ethyl acetate.

### **Representative procedure for deuterium crossover experiments.**

$\text{Pd}(\text{OAc})_2$  (0.4 mg, 2  $\mu\text{mol}$ ) was added to 13x100 mm disposable culture tubes. The reaction tubes were placed into a custom 48-well parallel reactor mounted on a large capacity mixer and the headspace was purged with molecular oxygen for ca. 15 min. Solutions of pyridine (8  $\mu\text{mol}$  in 0.5 mL toluene) and a 1:1 mixture of **1** and **6-*d*<sub>3</sub>-1** (0.1 mmol in 0.5 mL toluene) were added to tubes. The reactions were carried out for 24 h under an oxygen atmosphere (1 atm) at 80 °C. Following removal of the solvent under vacuum, the crude oxidative amination product was purified via column chromatography with hexanes/ethyl acetate. The purified product was dissolved in  $\text{CH}_2\text{Cl}_2$  and analyzed by  $^1\text{H}$  NMR spectroscopy and mass spectrometry (ESI-MS).

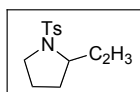

**Predicted:**

Peak (relative intensity): 252.1 (100%), 253.1 (16%), 254.1 (6%), 255.1 (1%).

**Experimental:**

Peak (relative intensity): 252.2 (100%), 253.2 (13%), 254.2 (5%).

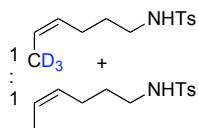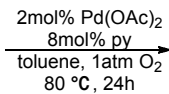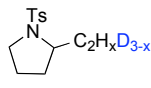

**Experimental:**

Peak (relative intensity): 252.2 (100%), 253.2 (13%), 254.2 (75%), 255.2 (26%), 256.2 (7%)

**Calculated %:**

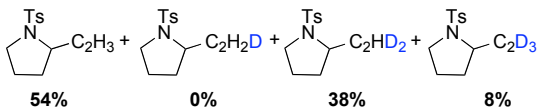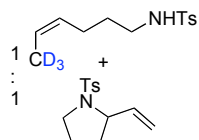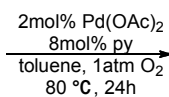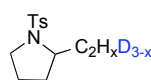

**Experimental:**

Peak (relative intensity): 252.2 (100%), 253.2 (31%), 254.2 (31%), 255.2 (11%)

**Calculated %:**

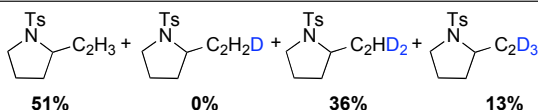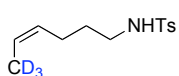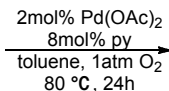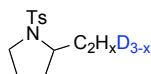

**Experimental:**

Peak (relative intensity): 254.2 (100%), 255.2 (38%), 256.2 (8%), 257.2 (4%)

**Calculated %:**

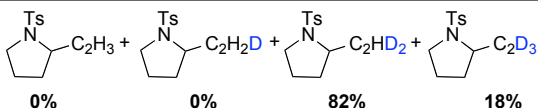

**Figure S1.** Results from crossover experiments.

**Catalytic reaction monitored by  $^1\text{H}$  NMR spectroscopy.**

A freshly prepared solution of  $\text{Pd}(\text{OAc})_2$ , pyridine and (*Z*)-4-hexenyltosylamide (5.0 mM palladium, 11.0 mM pyridine, 32.2 mM tosylamide, 3.0 mM 1,3,5-tri-*tert*-butylbenzene, in toluene- $d_8$ , 0.7 mL) was added to a medium-wall NMR tube fused to a 14/20 ground glass joint. The NMR tube was attached to a gas/vacuum manifold containing a mercury manometer, and the solution was frozen in liquid nitrogen. The solution was degassed three times (freeze-pump-thaw cycles) and then a calibrated volume of oxygen (0.354 mmol) was condensed into the tube to achieve a final pressure of 3.5 atm in the headspace above the solution. The solution was kept cold in a bath of dry ice/acetone until it was inserted into the spectrometer probe, preheated to 40 °C.

## NMR Spectral timecourse for the oxidative amination of (Z)-4-hexenyltosylamide.

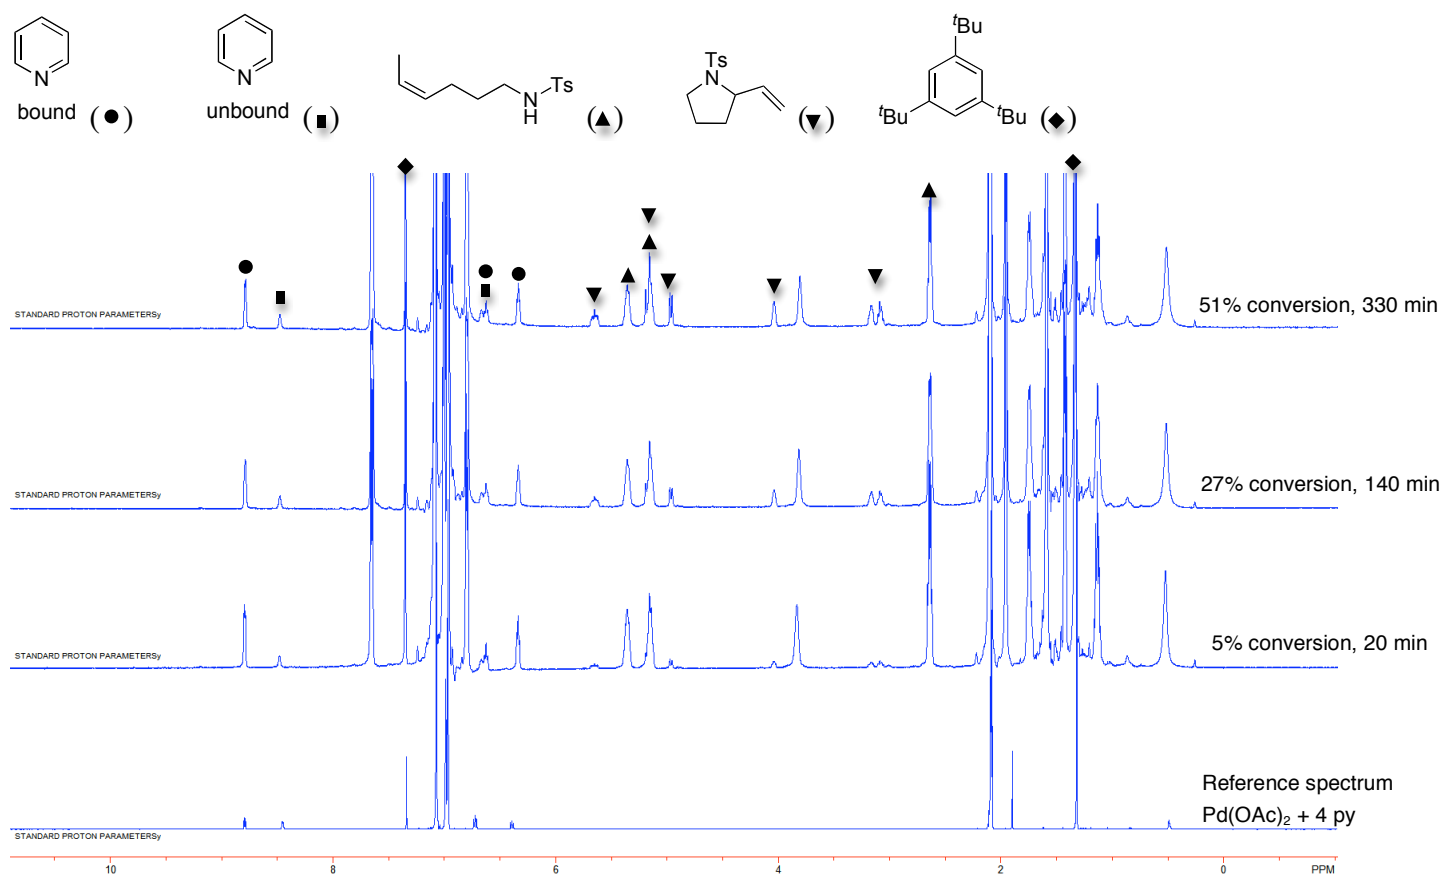

**Figure S2.** The full <sup>1</sup>H NMR spectral timecourse of catalytic aerobic oxidative heterocyclization of (Z)-4-hexenyltosylamide. Conditions: [Pd(OAc)<sub>2</sub>] = 5.0 mM, [pyridine] = 11.0 mM, toluene, initial *p*O<sub>2</sub> = 3.5 atm, 40 °C.

## Mathematical derivation of the rate law based on mechanism in Scheme 5.

The following mechanism (Scheme 5) accounts for the experimental observations.

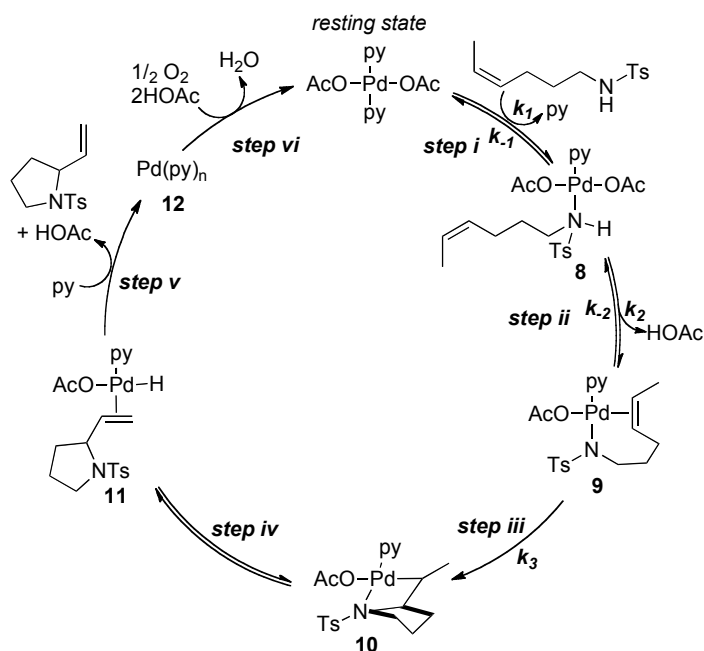

### I. Derivation of the rate law based on steady-state approximation on intermediates **8** and **9**.

The rate of product formation is described by the following rate law.

$$\frac{d[\text{prod}]}{dt} = k_3 \cdot [9] \quad (\text{S1})$$

The total palladium concentration has contribution from  $\text{Pd}(\text{OAc})_2(\text{py})_2$ , **8** and **9**.

$$[\text{Pd}]_{\text{T}} = [\text{Pd}(\text{OAc})_2(\text{py})_2] + [8] + [9] \quad (\text{S2})$$

Applying steady-state approximation on **8** and **9**.

$$\frac{d[8]}{dt} = k_1[\text{Pd}(\text{OAc})_2(\text{py})_2][\text{Amide}] + k_2[\text{HOAc}][9] - k_{-1}[\text{py}][8] - k_2[8] = 0 \quad (\text{S3})$$

$$\frac{d[9]}{dt} = k_2[8] - k_{-2}[\text{HOAc}][9] - k_3[9] = 0 \quad (\text{S4})$$

Steady-state concentrations of **8** and  $[\text{Pd}(\text{OAc})_2(\text{py})_2]$  can be described as

$$[8] = \frac{(k_{-2}[\text{HOAc}] + k_3)}{k_2} \cdot [9] \quad (\text{S5})$$

$$[\text{Pd}(\text{OAc})_2(\text{py})_2] = \frac{k_2 k_3 + (k_{-1} k_3 + k_{-1} k_2 [\text{HOAc}])[\text{py}]}{k_1 k_2 [\text{Amide}]} \cdot [9] \quad (\text{S6})$$

By substituting eq S5 and eq S6 into eq S2, one obtains

$$[9] = \frac{k_1 k_2 [\text{Pd}]_T [\text{Amide}]}{k_2 k_3 + (k_1 k_3 + k_1 k_2 [\text{HOAc}]) [\text{py}] + (k_1 k_2 + k_1 k_3 + k_1 k_2 [\text{HOAc}]) [\text{Amide}]} \quad (\text{S7})$$

Substitution of eq S7 into eq S1 yields the rate law.

$$\frac{d[\text{prod}]}{dt} = \frac{k_1 k_2 k_3 [\text{Pd}]_T [\text{Amide}]}{k_2 k_3 + (k_1 k_3 + k_1 k_2 [\text{HOAc}]) [\text{py}] + (k_1 k_2 + k_1 k_3 + k_1 k_2 [\text{HOAc}]) [\text{Amide}]} \quad (\text{S8})$$

**II.** Derivation of the rate law based on pre-equilibrium approximation on intermediate **8**, and steady-state approximation on intermediate **9**.

Applying pre-equilibrium approximation on intermediate **8**

$$K_1 = \frac{k_1}{k_{-1}} = \frac{[\text{py}][\mathbf{8}]}{[\text{Pd}(\text{OAc})_2(\text{py})_2][\text{Amide}]} \quad (\text{S9})$$

Steady-state concentrations of  $[\text{Pd}(\text{OAc})_2(\text{py})_2]$  can be described in terms of **8**, and by applying eq S5, steady-state concentrations of  $[\text{Pd}(\text{OAc})_2(\text{py})_2]$  can be described in terms of **9**

$$[\text{Pd}(\text{OAc})_2(\text{py})_2] = \frac{[\text{py}]}{K_1 [\text{Amide}]} \cdot [\mathbf{8}] = \frac{(k_2 [\text{HOAc}] + k_3) [\text{py}]}{k_2 K_1 [\text{Amide}]} \cdot [9] \quad (\text{S10})$$

By substituting eq S5 and eq S10 into eq S2, one obtains

$$[9] = \frac{K_1 k_2 [\text{Pd}]_T [\text{Amide}]}{(k_2 [\text{HOAc}] + k_3) [\text{py}] + (k_1 k_3 + K_1 k_2 + K_1 k_2 [\text{HOAc}]) [\text{Amide}]} \quad (\text{S11})$$

Substitution of eq S11 into eq S1 yields the rate law.

$$\frac{d[\text{prod}]}{dt} = \frac{K_1 k_2 k_3 [\text{Pd}]_T [\text{Amide}]}{(k_2 [\text{HOAc}] + k_3) [\text{py}] + (k_1 k_3 + K_1 k_2 + K_1 k_2 [\text{HOAc}]) [\text{Amide}]} \quad (\text{S12})$$

**III.** Derivation of the rate law in the presence of a large excess of pyridine. (Based on steady-state approximations on intermediates **8** and **9**.)

The following derivation reveals the origin of the half-order [palladium] dependence when the reaction is conducted in the presence of an excess of pyridine. If no acetic acid is added to the reaction, then the steady state concentration of acetic acid can be equated to the concentration of **9** according to the equilibrium between **8** and **9**.

$$[9] = [\text{HOAc}] \quad (\text{S13})$$

Equation S2 can be rewritten to substitute for the steady-state concentration of acetic acid.

$$\frac{k_1 k_{-2} + k_{-1} k_2 [\text{py}]}{k_1 k_2} \cdot [9]^2 + \frac{k_2 k_3 + k_{-1} k_3 [\text{py}] + (k_1 k_3 + k_1 k_2) [\text{Amide}]}{k_1 k_2 [\text{Amide}]} \cdot [9] - [\text{Pd}]_T = 0 \quad (\text{S14})$$

Application of the quadratic formula allows one to solve equation S14 for **9**.

$$[9] = \sqrt{\frac{k_1 k_2 [\text{Pd}]_T}{k_1 k_2 + k_{-1} k_2 [\text{py}]} + \left( \frac{k_2 k_3 + k_{-1} k_3 [\text{py}] + (k_1 k_3 + k_1 k_2) [\text{Amide}]}{2(k_1 k_2 + k_{-1} k_2 [\text{py}]) [\text{Amide}]} \right)^2} - \frac{k_2 k_3 + k_{-1} k_3 [\text{py}] + (k_1 k_3 + k_1 k_2) [\text{Amide}]}{2(k_1 k_2 + k_{-1} k_2 [\text{py}]) [\text{Amide}]} \quad (\text{S15})$$

The rate law can now be solved with the  $[\text{Pd}]_T$  term under the square root.

$$\frac{d[\text{prod}]}{dt} = k_3 \cdot \sqrt{\frac{k_1 k_2 [\text{Pd}]_T}{k_1 k_2 + k_{-1} k_2 [\text{py}]} + \left( \frac{k_2 k_3 + k_{-1} k_3 [\text{py}] + (k_1 k_3 + k_1 k_2) [\text{Amide}]}{2(k_1 k_2 + k_{-1} k_2 [\text{py}]) [\text{Amide}]} \right)^2} - k_3 \cdot \frac{k_2 k_3 + k_{-1} k_3 [\text{py}] + (k_1 k_3 + k_1 k_2) [\text{Amide}]}{2(k_1 k_2 + k_{-1} k_2 [\text{py}]) [\text{Amide}]} \quad (\text{S16})$$



## Computational studies of Pd-amidate formation.

Previous experimental and computational studies of Pd(OAc)<sub>2</sub>/pyridine-catalyzed alcohol oxidation implicate formation of a Pd-alkoxide intermediate via a proton-coupled ligand substitution pathway (Scheme S1).<sup>1</sup> <sup>1</sup>H NMR spectroscopic data support a pre-equilibrium hydrogen bonding interaction between the alcohol substrate and an acetate ligand of the (py)<sub>2</sub>Pd(OAc)<sub>2</sub> catalyst resting state. No experimental evidence was obtained for a similar substrate-catalyst interaction in the case of the sulfonamide substrates considered in the present study, and DFT computational studies suggest that a similar pathway for formation of a Pd-NMsR intermediate, proceeding at the coordinatively saturated *trans*-(py)<sub>2</sub>Pd(OAc)<sub>2</sub>, is energetically disfavored ( $\Delta G^\ddagger > 35$  kcal/mol). Subsequent evaluation of other possible ligand substitution transition states, involving coordination of amine or alkene to the Pd center, were also energetically disfavored.<sup>2</sup>

**Scheme S1.** Proton-Coupled Ligand Substitution Pathways Leading to Formation of Alkoxide and Amidate Palladium Species.

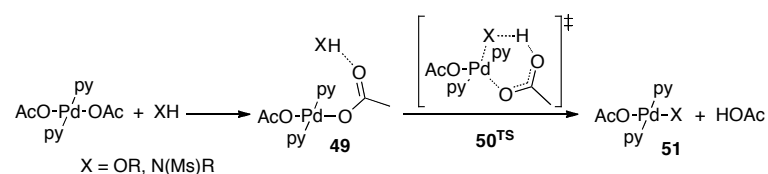

These computational results prompted us to evaluate a pathway involving a mono-ligated Pd species resulting from pyridine dissociation from *trans*-(py)<sub>2</sub>Pd(OAc)<sub>2</sub> (Figure S3). Intramolecular displacement of pyridine by the carbonyl group of an acetate ligand proceeds with a barrier similar to that expected for the highest barrier during catalytic turnover (21.8 kcal/mol, [**52**/py]<sup>TS</sup>). A pathway was found for reaction of (py)Pd(OAc)(κ<sup>2</sup>-OAc) (κ<sup>2</sup>-**53**) with the substrate to form the Pd-sulfonamide

adduct **8M** via intermediate **54** and transition-state **55<sup>TS</sup>**; however, the barrier for this pathway would suggest that formation of this species is rate-limiting, a result inconsistent with the experimental data (see manuscript). Alternatively, a dissociative pathway affords a more viable intermediate  $\kappa^1$ -**53** that, in the presence of substrate **1M**, can be trapped to form amine adduct **8M** (Figure S3). The calculated energies of the species in Figure S3 are consistent with the inability to observe interactions between *trans*-(py)<sub>2</sub>Pd(OAc)<sub>2</sub> and substrate by <sup>1</sup>H NMR spectroscopy.

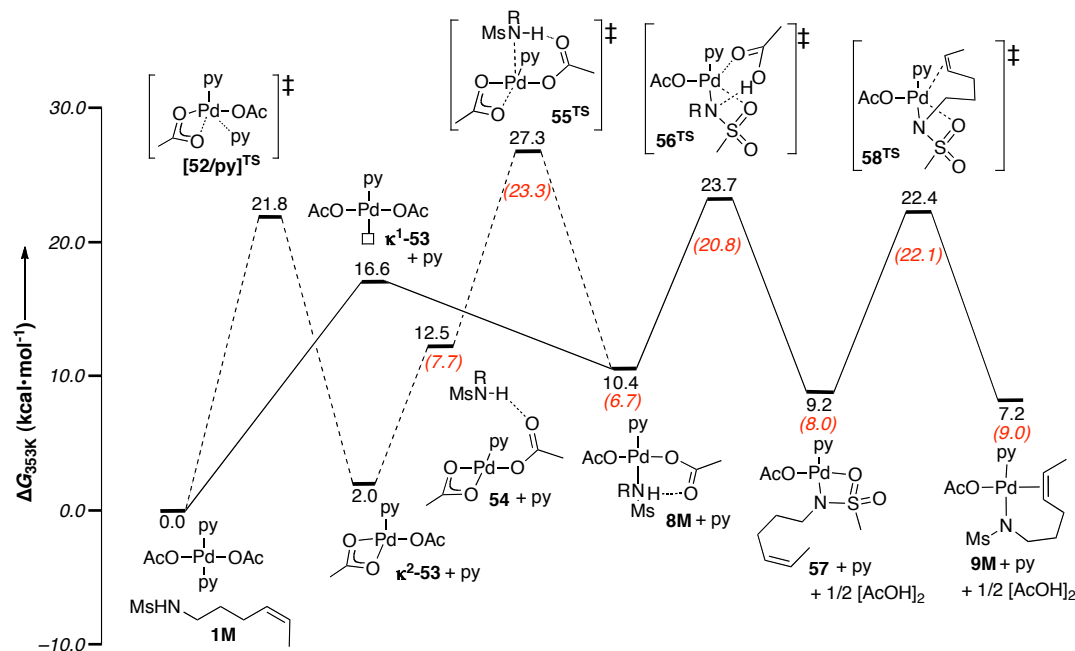

**Figure S3.** Lowest free energy pathway for formation of an alkene-coordinated Pd-amidate intermediate necessary for *cis*-aminopalladation. Free energies calculated without inclusion of solvation are italicized in red.

Amine-adduct **8M** features a stabilizing intramolecular hydrogen bond between the amine N-H and carbonyl oxygen of acetate. Pd-amidate formation then occurs by inner-sphere proton transfer, and acetic acid will be formed and subsequently liberated from the palladium complex. Such a step is necessitated, *prior to the turnover-limiting step*, to rationalize the catalyst dependences in the presence of excess pyridine or acetic acid (Figure S3). We have identified a number of transition states that lead to formation of Pd-amidate species; however, only one transition state, **56<sup>TS</sup>**, was found to have a barrier

sufficiently low in energy to be considered viable. After formation of  $\kappa^2$ -amidate species **57**, a transition state (**58<sup>TS</sup>**), defining concomitant intramolecular alkene ligand substitution and  $\kappa^2$ -to- $\kappa^1$  amidate isomerization, was identified. This final transformation yields intermediate **9M** ligated by both an amidate and alkene that was expected to be critical for subsequent insertion of alkene into the palladium-amidate bond.

We were initially concerned by the apparent experimental/computational discrepancy that resulted from a comparison of the barriers for **56<sup>TS</sup>** and **58<sup>TS</sup>**. Namely, the latter transition state is more stable, which is inconsistent with the fact that steady-state formation of a Pd-amidate intermediate is necessitated by the catalyst dependence data (Figure S3). However, we noted that many of the species leading to the Pd-amidate **57** featured substantial hydrogen-bonding that could be problematic for the solvation model to account for properly. Indeed, comparison of the gas-phase barrier heights demonstrate the experimentally expected outcome: **56<sup>TS</sup>** is more stable than **58<sup>TS</sup>** by 1.3 kcal/mol (Figure S3).

**Analysis of natural charges (NC) of alkene insertion transition state.**

**Table S1.** Calculated Natural Charges (NC) of Alkene-bound Palladium-Amidate Complexs (**9M** and  $\kappa^2$ -**16M**) and the Corresponding Alkene Insertion Transition States (**13**<sup>AP-TS</sup> and **17**<sup>AP-TS</sup>).

|                                          | <i>9M</i> | <i>13</i> <sup>AP-TS</sup> |                                      | <i>k</i> <sup>2</sup> - <i>16M</i> | <i>17</i> <sup>AP-TS</sup> |
|------------------------------------------|-----------|----------------------------|--------------------------------------|------------------------------------|----------------------------|
| <b>Pd</b>                                | 0.55      | 0.51                       | <b>Pd</b>                            | 0.57                               | 0.53                       |
| <b>Substrate</b>                         | -0.21     | -0.12                      | <b>Substrate</b>                     | -0.13                              | -0.03                      |
| <b>(py)Pd(<math>\kappa^1</math>-OAc)</b> | 0.21      | 0.12                       | <b>Pd(<math>\kappa^2</math>-OAc)</b> | 0.13                               | 0.03                       |
| <b>NMs</b>                               | -0.45     | -0.37                      | <b>NMs</b>                           | -0.38                              | -0.34                      |
| <b>Alkene(C1-C2)</b>                     | 0.20      | 0.20                       | <b>Alkene(C1-C2)</b>                 | 0.22                               | 0.27                       |
| <b>Pd</b>                                | 0.55      | 0.51                       | <b>Pd</b>                            | 0.57                               | 0.53                       |
| <b>C1---Pd</b>                           | -0.16     | -0.38                      | <b>C1---Pd</b>                       | -0.16                              | -0.32                      |
| <b>C2---N</b>                            | -0.17     | 0.07                       | <b>C2---N</b>                        | -0.19                              | 0.06                       |
| <b>N</b>                                 | -0.88     | -0.86                      | <b>N</b>                             | -0.83                              | -0.86                      |

Solvation-corrected total energies ( $E_{sol}$ ) and thermochemical corrections at 353K (kcal/mol) and three lowest frequencies from normal-mode analysis.

| <i>Description</i>                                                     | <i>Label</i>                               | $E_{sol}$    | $ZPE$  | $G_{corr}^{(298K)}$ | $G_{corr}^{(353K)}$ | $E_{pcm}^{(353K)}$ | freq                |
|------------------------------------------------------------------------|--------------------------------------------|--------------|--------|---------------------|---------------------|--------------------|---------------------|
| pyridine                                                               | <b>py</b>                                  | -155807.97   | 55.78  | 38.99               | 35.19               | -155837.62         | 384.3, 418.5, 613.3 |
| acetic acid                                                            | <b>HOAc</b>                                | -143760.01   | 38.76  | 21.68               | 17.81               | -143798.97         | 69.8, 422.4, 548.6  |
| acetic acid dimer                                                      | <b>[HOAc]<sub>2</sub></b>                  | -287536.34   | 79.09  | 55.70               | 49.94               | -287613.67         | 41.7, 50.4, 68.3    |
| cis-alkenylNH <sub>2</sub> SO <sub>2</sub> CH <sub>3</sub>             | <b>1M</b>                                  | -551647.70   | 139.12 | 112.26              | 105.34              | -551730.13         | 21.5, 30.3, 60.6    |
| R-vinylpyrrolidine                                                     | <b>Vpyr</b>                                | -550882.18   | 125.74 | 101.46              | 95.26               | -550962.84         | 27.4, 66.3, 85.6    |
| trans-(py) <sub>2</sub> Pd( $\kappa^1$ -OAc) <sub>2</sub>              | <b>(py)<sub>2</sub>Pd(Oac)<sub>2</sub></b> | -678697.49   | 179.10 | 143.62              | 133.96              | -930896.10         | 30.4, 32.3, 40.5    |
| trans(py)(NMs)Pd(alkene)(OAc)                                          | <b>(trans-py-amidate)13AP-</b>             |              |        |                     |                     |                    |                     |
| cis-AP TS                                                              | <b>TS</b>                                  | -930741.55   | 222.38 | 187.43              | 177.59              | -930896.10         | -252.4, 30.4, 36.5  |
| cis(py)(NMs)Pd(alkene)(OAc) cis-AP TS                                  | <b>(cis-py-amidate)13AP-</b>               |              |        |                     |                     |                    |                     |
| (NMs)Pd(alkene)( $\kappa^2$ -OAc) cis-AP TS                            | <b>17AP-TS</b>                             | -930737.98   | 222.27 | 186.78              | 176.83              | -930892.98         | -270.7, 24.6, 31.4  |
| (NMs)Pd(alkene)( $\kappa^2$ -OAc) cis-AP TS                            | <b>17AP-TS</b>                             | -774926.00   | 165.15 | 134.64              | 126.39              | -775047.36         | -254.2, 25.2, 30.8  |
| cis(alkene)(py)Pd(NMs-)(Oac)                                           | <b>9M</b>                                  | -930754.32   | 222.68 | 186.88              | 176.79              | -930910.00         | 28.1, 32.1, 32.8    |
| (NMs)(alkene)Pd( $\kappa^2$ - $\kappa^1$ -OAc)(py)                     |                                            |              |        |                     |                     |                    |                     |
| py add trans to NMs                                                    | <b>[15/py]TS</b>                           | -930741.12   | 222.03 | 186.83              | 176.91              | -930894.19         | -84.4, 29.9, 37.0   |
| ( $\kappa^2$ -OAc)Pd(NMs-)( $\eta^2$ -alkene)                          | <b><math>\kappa^2</math>-16M</b>           | -774936.21   | 165.72 | 135.21              | 126.90              | -775058.29         | 27.9, 38.6, 43.5    |
| (py)( $\kappa^1$ -OAc)Pd( $\kappa^2$ -alkyl-Npyrrolidine) cis py alkyl | <b>10M</b>                                 | -930756.9101 | 223.60 | 187.99              | 178.01              | -930911.08         | 26.3, 33.8, 38.7    |

|                                                           |                         |            |        |        |        |            |                    |
|-----------------------------------------------------------|-------------------------|------------|--------|--------|--------|------------|--------------------|
| ( $\kappa^2$ -alkyl-Npyrrolidine)Pd(II)( $\kappa^1$ -OAc) | <b>14</b>               | -774920.98 | 166.01 | 135.05 | 126.67 | -775043.49 | 25.5, 41.7, 53.5   |
| Pd( $\kappa^2$ -N-alkyl)( $\kappa^2$ -OAc)                | <b>18M</b>              | -774940.49 | 166.60 | 135.94 | 127.66 | -775060.80 | 26.6, 28.5, 47.3   |
| (py)Pd(AcO)(H--vinylN)<br>BHE TS trans to py              | <b>trans-19 BHE-TS</b>  | -930731.60 | 220.51 | 182.95 | 172.60 | -930888.43 | -41.2, 8.8, 22.0   |
| (py)Pd(AcO)(H--vinylN)<br>BHE TS cis to py                | <b>cis-19 1°-BHE-TS</b> | -930737.70 | 220.73 | 184.13 | 173.72 | -930894.47 | -450.2, 16.2, 24.7 |
| (py)Pd(OAc)(2°-BHE vinylN)                                | <b>cis-20 2°-BHE-TS</b> | -930734.05 | 220.47 | 183.25 | 172.97 | -930890.56 | -620.4, 15.0, 20.8 |
| trans(py)(vinylpyrrolidine)Pd(H)OAc                       | <b>11M</b>              | -930743.63 | 221.69 | 184.78 | 174.52 | -930898.74 | 20.4, 23.9, 27.8   |
| (py)Pd( $\kappa^2$ -N-alkyl)(OAc) - 1° alkyl #2           | <b>21</b>               | -930761.24 | 224.40 | 190.50 | 181.02 | -930916.27 | -37.1, 29.8, 35.7  |
| (py)Pd(OAc)(H)....trans-to-py-open                        | <b>22</b>               | -379836.54 | 94.23  | 68.30  | 61.81  | -379907.72 | 25.3, 54.3, 58.8   |
| (py)Pd(H)( $\kappa^2$ -OAc)                               | <b>23</b>               | -379858.24 | 94.47  | 69.04  | 62.68  | -379927.46 | 31.1, 39.3, 62.4   |
| cis(py)(H)Pd(OAc) - RE TS                                 | <b>24TS</b>             | -379846.06 | 93.16  | 67.27  | 60.85  | -379918.00 | -29.1, 12.2, 37.5  |
| cis(py)(H)Pd(OAc) - isom TS                               | <b>26TS</b>             | -379845.25 | 93.24  | 67.76  | 61.39  | -379916.85 | -23.8, 34.7, 41.6  |
| cis(py)(H)Pd(OAc)                                         | <b>25</b>               | -379846.03 | 93.25  | 65.47  | 58.58  | -379918.18 | 5.4, 22.1, 28.6    |
| trans-(py)Pd <sup>0</sup> (HOAc)                          | <b>27</b>               | -379855.84 | 95.93  | 69.27  | 62.64  | -379926.71 | 11.3, 32.2, 49.5   |
| Pd(H--vinylN)( $\kappa^2$ -OAc) BHE TS                    | <b>28 1°-BHE-TS</b>     | -774922.00 | 163.88 | 132.85 | 124.52 | -775044.89 | -522.4, 22.5, 35.1 |
| Pd( $\kappa^2$ -OAc)(2°-BHE vinylN)                       | <b>30 2°-BHE-TS</b>     | -774919.60 | 163.79 | 132.48 | 124.11 | -775044.14 | -527.0, 22.2, 27.9 |
| ( $\kappa^2$ -OAc)Pd( $\eta^2$ -VP)(H)                    | <b>29M</b>              | -774926.46 | 164.67 | 133.21 | 124.76 | -775047.89 | 27.5, 32.3, 35.1   |
| Pd( $\kappa^2$ -OAc)(H)....trans-to-OAc-open              | <b>31</b>               | -224013.07 | 36.79  | 16.71  | 12.07  | -224050.40 | 36.0, 124.5, 219.3 |

|                                                                                         |                                 |             |        |        |        |                          |                    |
|-----------------------------------------------------------------------------------------|---------------------------------|-------------|--------|--------|--------|--------------------------|--------------------|
| Pd( $\kappa^2$ -N-alkyl)( $\kappa^2$ -OAc) - 1° alkyl #2                                | <b>32</b>                       | -774944.78  | 167.31 | 137.31 | 129.22 | -775065.36               | 20.5, 36.8, 51.4   |
| ( $\kappa^2$ - $\kappa^1$ -OAc)Pd( $\eta^2$ -alkene to $\kappa^2$ alkene OMs)(H) isomTS | <b>33TS</b>                     | -774921.44  | 164.20 | 134.42 | 126.36 | -775045.31               | -102.0, 34.5, 47.8 |
| ( $\kappa^2$ -alkene, O-vinylpyrrolidine)Pd(H)OAc H-alkene cis                          | <b>34</b>                       | -774923.40  | 164.50 | 133.41 | 125.03 | -775049.44               | 23.2, 40.1, 44.1   |
| ( $\kappa^2$ -alkene, O-vinylpyrrolidine)Pd(H)OAc RE TS H-alkene cis                    | <b>35TS</b>                     | -774922.41  | 163.19 | 131.97 | 123.63 | -775047.65               | -244.2, 19.8, 22.1 |
| ( $\kappa^2$ -alkene.OMs)Pd <sup>0</sup> (HOAc)                                         | <b>36</b>                       | -774931.35  | 165.78 | 133.33 | 124.66 | -775056.07               | 14.4, 25.2, 36.8   |
| trans-(py) <sub>2</sub> Pd(OAc)(OAc--HNRMs)                                             | <b>49</b>                       | -1230324.99 | 318.50 | 269.83 | 255.75 | -1230547.639             | -99.9, 16.4, 19.3  |
| trans-(py) <sub>2</sub> Pd(OAc)(OAc--HNRMs) NH for OAc ligand substitution ts           | <b>50TS</b>                     | -1230292.78 | 319.72 | 343.51 | NC     | -1230564.92 <sup>a</sup> | -97.1, 16.5, 17.9  |
| trans-(py) <sub>2</sub> Pd(OAc)(NRMs)                                                   | <b>51</b>                       | -1086571.47 | 279.05 | 235.76 | 223.40 | -1086756.18              | 15.2, 19.5, 24.3   |
| (py)Pd( $\kappa^2$ -OAc)( $\kappa^1$ -OAc)--py trans--ts                                | <b>[52/py]TS</b>                | -678676.22  | 178.19 | 142.52 | 132.86 | -678812.18               | -78.4, 22.1, 25.0  |
| trans-(py)Pd( $\kappa^1$ -OAc) <sub>2</sub>                                             | <b><math>\kappa^1</math>-53</b> | -522856.89  | 121.68 | 91.28  | 83.31  | -522963.05               | 37.3, 37.6, 46.8   |
| (py)Pd( $\kappa^1$ -OAc)( $\kappa^2$ -OAc)                                              | <b><math>\kappa^2</math>-53</b> | -522873.34  | 121.94 | 91.41  | 83.45  | -522977.83               | 19.1, 34.8, 36.9   |
| (py)Pd( $\kappa^2$ -OAc)OAc--HNRMs                                                      | <b>54</b>                       | -1074526.51 | 261.78 | 214.94 | 201.87 | -1074712.99              | 4.9, 11.0, 15.9    |
| (py)Pd(OAc--HNRMs)( $\kappa^1$ -OAc) amine add TS                                       | <b>55TS</b>                     | -1074517.18 | 261.83 | 219.03 | 210.59 | -1074706.80              | -91.8, 16.1, 17.8  |

Ball-and-stick models of various [4,5]- and [6,5]-transition states for cis-aminopalladation.

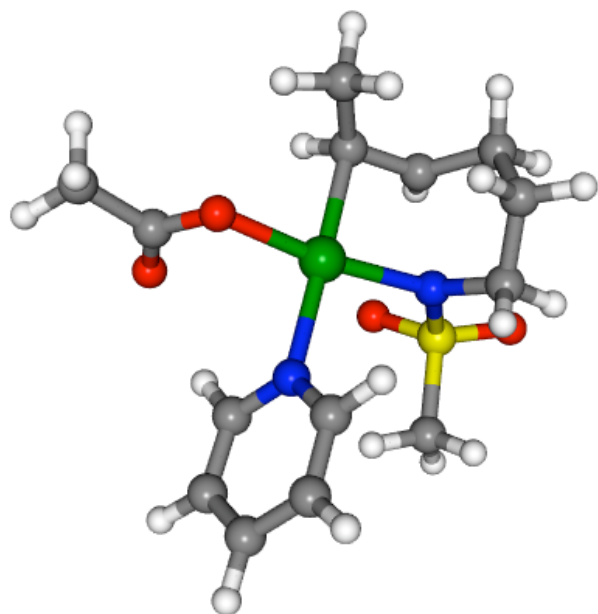

*cis*-13<sup>AP-TS</sup>  $\Delta G_{353K}^\ddagger = 24.3$  kcal/mol

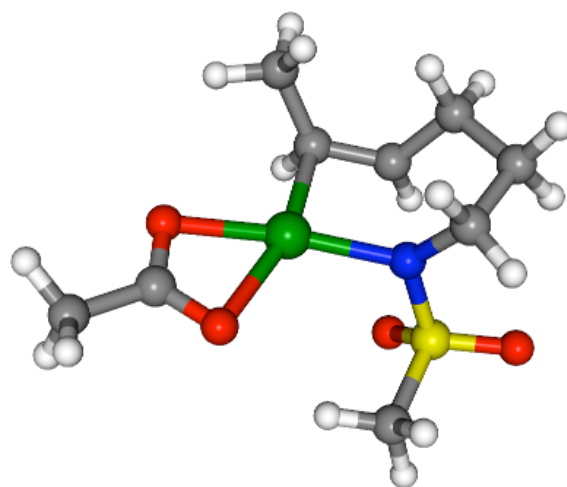

$\kappa^2$ -17<sup>AP-TS</sup>  $\Delta G_{353K}^\ddagger = 14.7$  kcal/mol

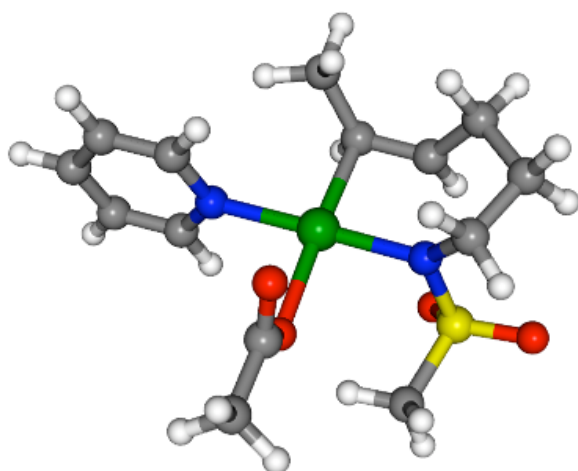

*trans*-13<sup>AP-TS</sup>  $\Delta G_{353K}^\ddagger = 22.0$  kcal/mol

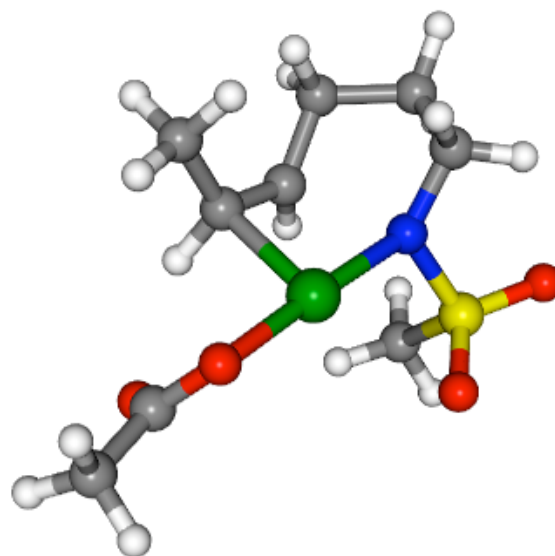

$\kappa^1$ -17<sup>AP-TS</sup>  $\Delta G_{353K}^\ddagger = 28.6$  kcal/mol



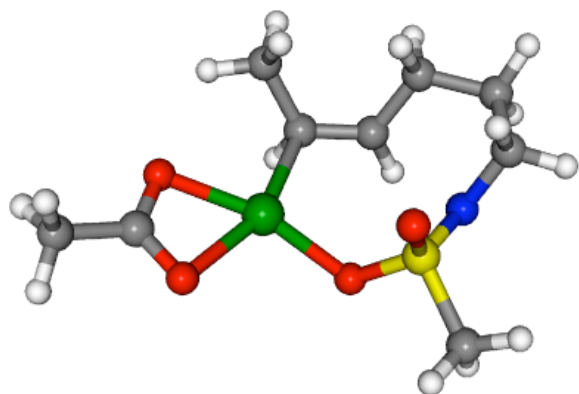

*cis*-[6,5]-A  $\Delta G^\ddagger_{353\text{K}} = 34.6$  kcal/mol

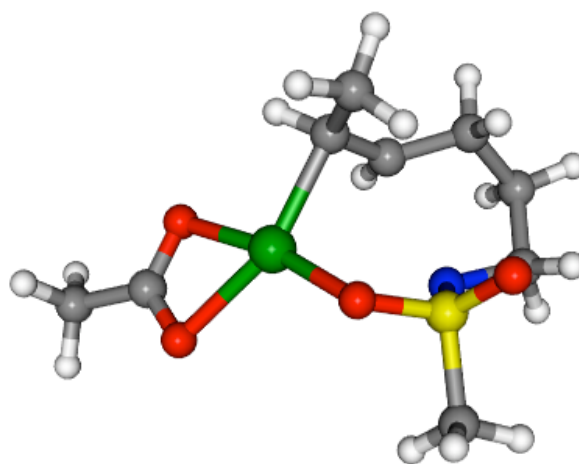

*cis*-[6,5]-D  $\Delta G^\ddagger_{353\text{K}} = 33.4$  kcal/mol

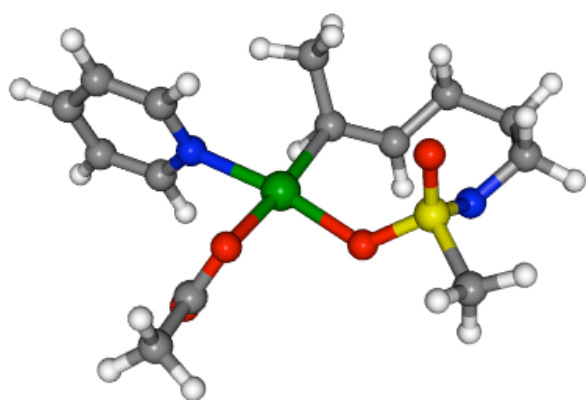

*cis*-[6,5]-B  $\Delta G^\ddagger_{353\text{K}} = 41.7$  kcal/mol

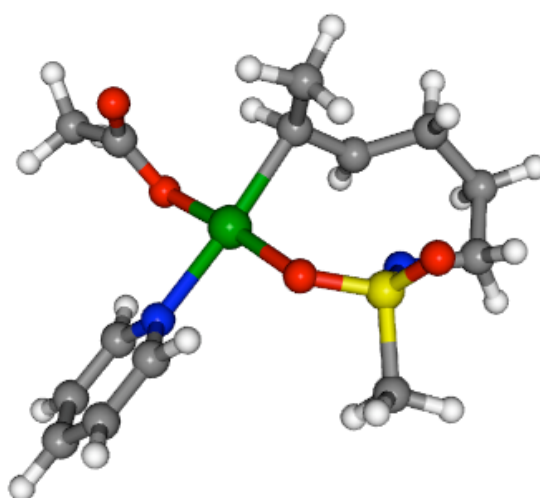

*cis*-[6,5]-F  $\Delta G^\ddagger_{353\text{K}} = 34.3$  kcal/mol

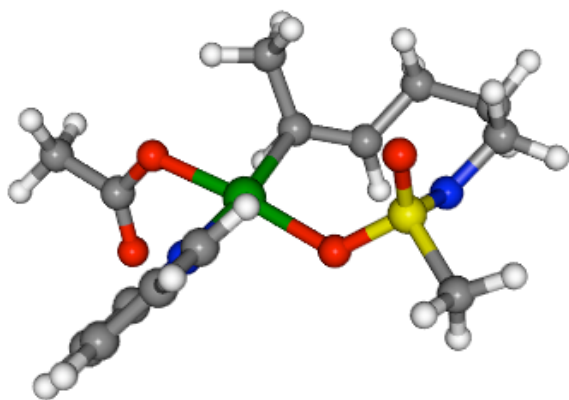

*cis*-[6,5]-C  $\Delta G^\ddagger_{353\text{K}} = 35.8$  kcal/mol

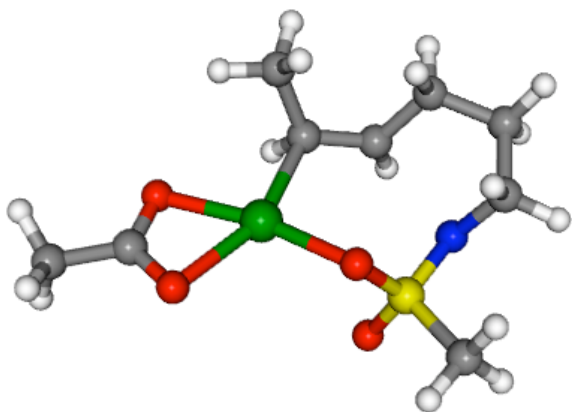

*cis*-[6,5]-G  $\Delta G_{353K}^\ddagger = 38.4$  kcal/mol

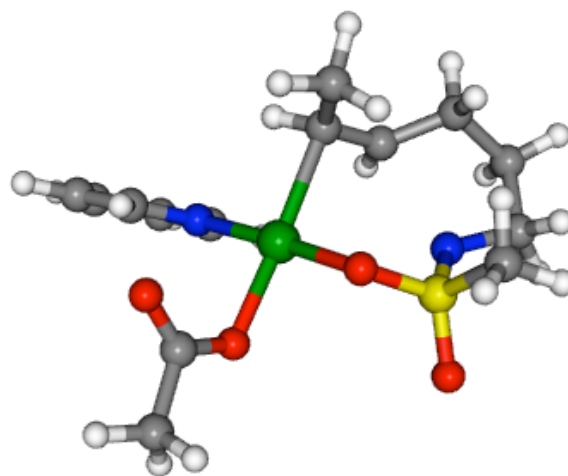

*cis*-[6,5]-I  $\Delta G_{353K}^\ddagger = 44.6$  kcal/mol

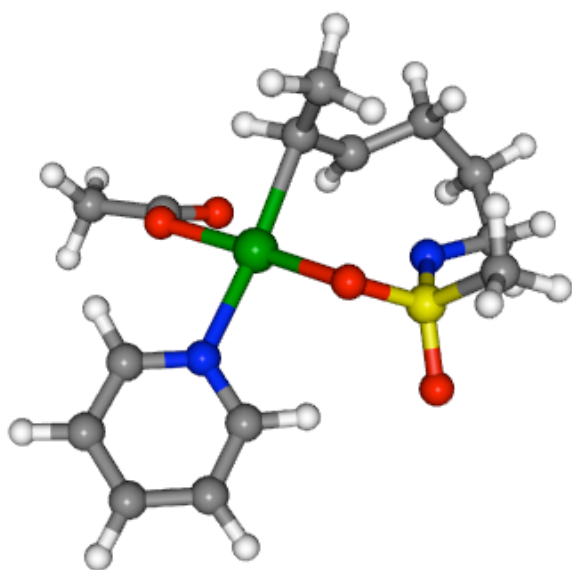

*cis*-[6,5]-H  $\Delta G_{353K}^\ddagger = 35.3$  kcal/mol

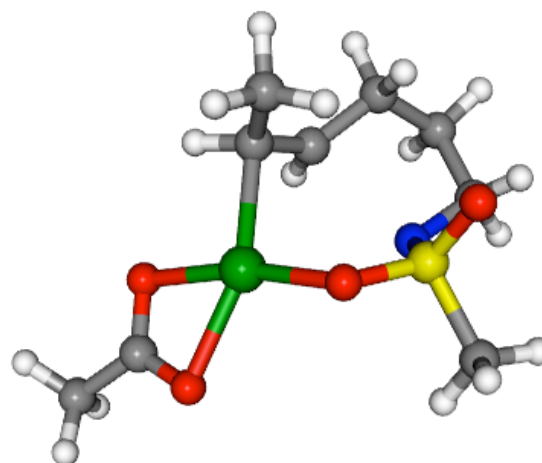

*cis*-[6,5]-J  $\Delta G_{353K}^\ddagger = 33.2$  kcal/mol

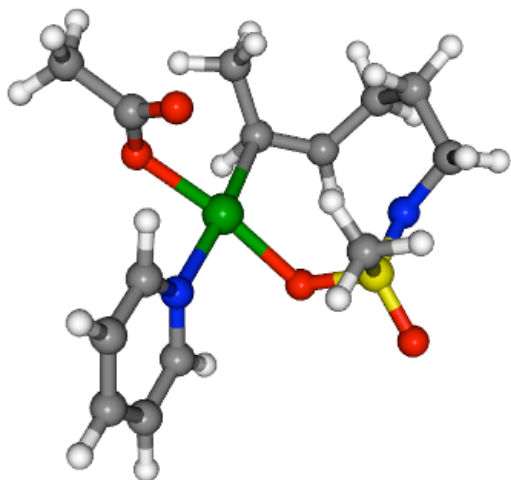

*cis*-[6,5]-K  $\Delta G^\ddagger_{298\text{K}} = 41.2$  kcal/mol

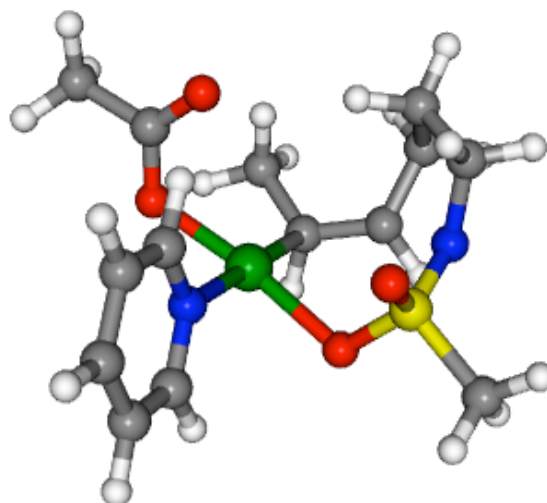

*cis*-[6,5]-N  $\Delta G^\ddagger_{298\text{K}} = 41.7$  kcal/mol

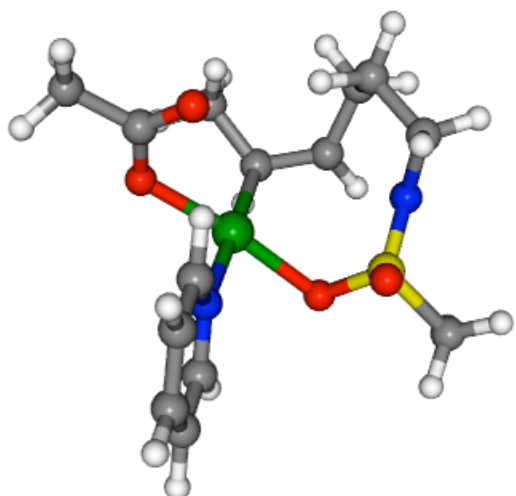

*cis*-[6,5]-L  $\Delta G^\ddagger_{298\text{K}} = 41.2$  kcal/mol

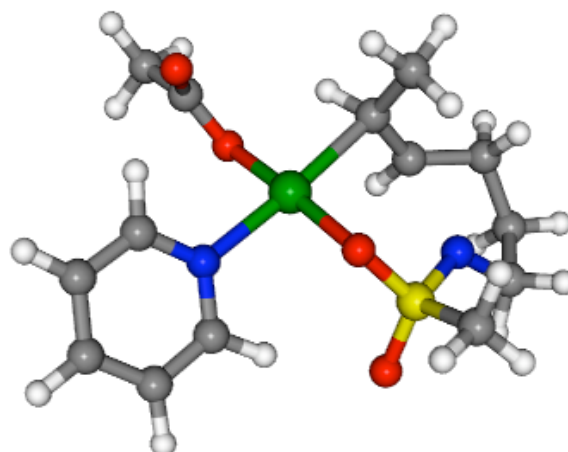

*cis*-[6,5]-O  $\Delta G^\ddagger_{298\text{K}} = 39.0$  kcal/mol

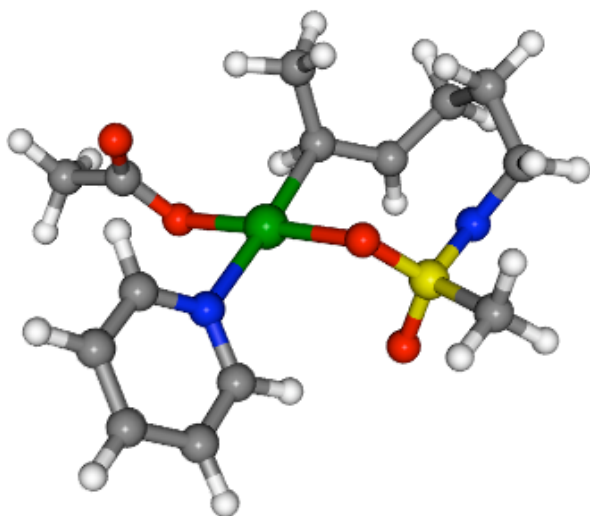

*cis*-[6,5]-M  $\Delta G^\ddagger_{298\text{K}} = 41.7$  kcal/mol

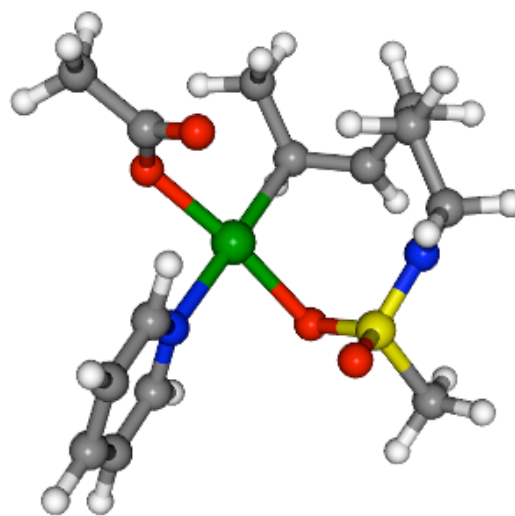

*cis*-[6,5]-P  $\Delta G^\ddagger_{298\text{K}} = 41.6$  kcal/mol

**Cartesian Coordinates for Optimized Complexes.****Py**

|   |           |          |           |
|---|-----------|----------|-----------|
| N | 0.013626  | 0.000000 | 0.007873  |
| C | 0.045790  | 0.000000 | 1.347809  |
| C | 1.227556  | 0.000000 | 2.094507  |
| C | 2.445542  | 0.000000 | 1.411944  |
| C | 2.427702  | 0.000000 | 0.015826  |
| C | 1.190137  | 0.000000 | -0.634246 |
| H | -0.921617 | 0.000000 | 1.847427  |
| H | 1.188716  | 0.000000 | 3.180378  |
| H | 3.387116  | 0.000000 | 1.955566  |
| H | 3.348682  | 0.000000 | -0.560733 |
| H | 1.139078  | 0.000000 | -1.721850 |

**HOAc**

|   |           |           |           |
|---|-----------|-----------|-----------|
| C | 1.267274  | 0.000000  | -0.601072 |
| C | -0.039216 | 0.000000  | 0.148978  |
| O | -1.103693 | 0.000000  | -0.698365 |
| O | -0.172045 | 0.000000  | 1.354154  |
| H | 2.095470  | 0.000000  | 0.108363  |
| H | 1.327608  | 0.882663  | -1.246945 |
| H | 1.327608  | -0.882663 | -1.246945 |
| H | -1.908802 | 0.000000  | -0.146471 |

[AcOH]<sub>2</sub>

|   |           |           |           |
|---|-----------|-----------|-----------|
| C | 1.568066  | 0.005396  | 2.931707  |
| C | 1.339487  | 0.009255  | 1.444316  |
| O | 0.099391  | -0.321251 | 1.104818  |
| O | 2.216910  | 0.291268  | 0.627407  |
| O | 1.953162  | 0.340298  | -2.066356 |
| C | 0.713077  | 0.009749  | -2.405856 |
| C | 0.484467  | 0.013724  | -3.893242 |
| O | -0.164358 | -0.272219 | -1.588946 |
| H | -0.004184 | -0.304760 | 0.107715  |
| H | 0.879392  | 0.707880  | 3.413563  |
| H | 1.353026  | -0.989570 | 3.336356  |
| H | 2.599496  | 0.283208  | 3.151251  |
| H | 2.056736  | 0.323810  | -1.069253 |
| H | 1.173104  | -0.688759 | -4.375150 |
| H | -0.546978 | -0.264034 | -4.112784 |
| H | 0.699538  | 1.008705  | -4.297838 |

**1M**

|   |           |           |           |
|---|-----------|-----------|-----------|
| C | -4.973637 | -7.853715 | -2.794513 |
| C | -3.775940 | -7.108109 | -2.271907 |
| C | -3.286726 | -5.929661 | -2.686352 |
| C | -3.815744 | -5.037848 | -3.779761 |
| C | -4.235249 | -3.651129 | -3.252055 |
| C | -4.704766 | -2.723333 | -4.375037 |
| N | -5.076794 | -1.410412 | -3.810742 |
| S | -5.600008 | -0.196424 | -4.873589 |
| O | -6.553934 | 0.617256  | -4.107177 |
| O | -5.966036 | -0.774322 | -6.174795 |
| C | -4.098236 | 0.769702  | -5.119286 |
| H | -5.538267 | -3.174156 | -4.929663 |
| H | -3.890527 | -2.562382 | -5.090394 |
| H | -3.396599 | -3.180679 | -2.722376 |
| H | -5.041409 | -3.778257 | -2.515386 |
| H | -4.663202 | -5.504668 | -4.294428 |
| H | -3.030203 | -4.900639 | -4.539376 |
| H | -5.768857 | -1.472063 | -3.064055 |
| H | -2.399391 | -5.548463 | -2.177144 |
| H | -3.248796 | -7.604887 | -1.455895 |
| H | -4.679426 | -8.839941 | -3.179253 |
| H | -5.698202 | -8.035794 | -1.989067 |
| H | -5.492800 | -7.323906 | -3.598316 |
| H | -4.351479 | 1.573082  | -5.815238 |
| H | -3.782289 | 1.171621  | -4.155689 |
| H | -3.329177 | 0.125293  | -5.550484 |

**VPyr**

|   |           |           |           |
|---|-----------|-----------|-----------|
| N | 0.500901  | 0.665188  | 0.784136  |
| C | 0.926869  | -0.741380 | 0.552340  |
| C | 2.197685  | -0.602883 | -0.296385 |
| C | 2.766647  | 0.750166  | 0.148021  |
| C | 1.519830  | 1.650246  | 0.318613  |
| C | 1.751570  | 2.781425  | 1.283362  |
| C | 1.921613  | 4.053347  | 0.917675  |
| S | -1.129919 | 1.025167  | 0.780797  |
| O | -1.282692 | 2.399398  | 1.264629  |
| O | -1.804763 | -0.102797 | 1.434226  |
| H | 0.140706  | -1.321867 | 0.060714  |
| H | 1.128705  | -1.219684 | 1.517621  |
| H | 1.942774  | -0.575759 | -1.363695 |
| H | 2.892818  | -1.434080 | -0.139807 |
| H | 3.277268  | 0.651576  | 1.114346  |
| H | 3.474707  | 1.190894  | -0.559963 |
| H | 1.238934  | 2.064869  | -0.662932 |
| C | -1.665696 | 1.020006  | -0.953697 |
| H | 1.817622  | 2.491066  | 2.331571  |
| H | 2.137137  | 4.830509  | 1.645495  |
| H | 1.833478  | 4.368825  | -0.120830 |
| H | -2.735526 | 1.242643  | -0.950689 |
| H | -1.124192 | 1.794847  | -1.500725 |
| H | -1.490183 | 0.031590  | -1.384421 |

|                                            |           |           |           |                                                     |           |           |           |
|--------------------------------------------|-----------|-----------|-----------|-----------------------------------------------------|-----------|-----------|-----------|
| <b>(py)<sub>2</sub>Pd(OAc)<sub>2</sub></b> |           |           | H         | 4.896462                                            | -0.713824 | -2.056488 |           |
|                                            |           |           | H         | 6.185918                                            | -0.025300 | -0.009170 |           |
| C                                          | -2.469541 | 0.340104  | 1.103933  | H                                                   | -0.462486 | 4.376084  | 1.008077  |
| N                                          | -1.794562 | -0.043733 | 0.002594  | H                                                   | 0.109475  | 4.238961  | 2.703610  |
| C                                          | -2.470985 | -0.430708 | -1.096763 | H                                                   | 1.266714  | 4.307460  | 1.348390  |
| C                                          | -3.863613 | -0.441771 | -1.130141 | H                                                   | 0.120376  | -4.317690 | -2.703983 |
| C                                          | -4.572732 | -0.050180 | 0.006671  | H                                                   | 1.283280  | -4.380677 | -1.353407 |
| C                                          | -3.862104 | 0.344705  | 1.141397  | H                                                   | -0.444222 | -4.457570 | -1.006181 |
| Pd                                         | 0.263075  | -0.039029 | -0.000470 |                                                     |           |           |           |
| O                                          | 0.264957  | -2.057660 | -0.334611 | <b>13<sup>AP-TS</sup> (<i>trans</i> py-amidate)</b> |           |           |           |
| C                                          | 0.274283  | -2.489580 | -1.563752 | C                                                   | -1.731725 | 1.262066  | 1.756535  |
| O                                          | 0.276339  | -1.767796 | -2.572296 | S                                                   | -1.409658 | 0.583443  | 0.112186  |
| N                                          | 2.320985  | -0.034321 | -0.003523 | O                                                   | -1.028308 | -0.831265 | 0.284720  |
| C                                          | 2.997444  | 0.342028  | 1.099589  | O                                                   | -2.559176 | 0.926710  | -0.743324 |
| C                                          | 4.390111  | 0.352708  | 1.132972  | N                                                   | -0.083771 | 1.440477  | -0.457362 |
| C                                          | 5.099245  | -0.027837 | -0.007581 | C                                                   | 1.244455  | 0.818748  | -0.341305 |
| C                                          | 4.388565  | -0.411698 | -1.146058 | C                                                   | 1.523524  | -0.001823 | -1.604899 |
| C                                          | 2.995965  | -0.407517 | -1.108608 | C                                                   | 1.198649  | 0.902735  | -2.808798 |
| O                                          | 0.256900  | 1.979591  | 0.333673  | C                                                   | -0.121706 | 1.597322  | -2.638591 |
| C                                          | 0.267510  | 2.411570  | 1.562786  | C                                                   | -0.339114 | 2.984644  | -2.880010 |
| O                                          | 0.275505  | 1.689817  | 2.571322  | C                                                   | 0.686549  | 3.889048  | -3.546841 |
| C                                          | 0.287717  | 3.932071  | 1.670467  | Pd                                                  | -0.392282 | 3.447011  | -0.816703 |
| C                                          | 0.301205  | -4.009974 | -1.671532 | O                                                   | -0.506234 | 3.822435  | 1.377468  |
| H                                          | -1.865443 | -0.733148 | -1.945429 | C                                                   | 0.547772  | 4.101322  | 2.029839  |
| H                                          | -1.862913 | 0.645357  | 1.950816  | C                                                   | 0.501383  | 4.404101  | 3.503126  |
| H                                          | -4.372746 | -0.755062 | -2.036086 | N                                                   | -0.703496 | 5.497422  | -1.146795 |
| H                                          | -4.370022 | 0.655632  | 2.048837  | H                                                   | 1.979633  | 1.622411  | -0.219793 |
| H                                          | -5.659401 | -0.052704 | 0.008267  | H                                                   | 1.291445  | 0.186666  | 0.551858  |
| H                                          | 2.391683  | 0.637092  | 1.950802  | H                                                   | -2.630095 | 0.763932  | 2.130352  |
| H                                          | 2.389095  | -0.705413 | -1.958044 | H                                                   | -1.880548 | 2.339936  | 1.672445  |
| H                                          | 4.899251  | 0.657209  | 2.041915  |                                                     |           |           |           |

|                                                       |           |           |           |   |           |           |           |
|-------------------------------------------------------|-----------|-----------|-----------|---|-----------|-----------|-----------|
| H                                                     | -0.875467 | 1.038489  | 2.396569  | C | -3.019829 | -3.397926 | -0.795771 |
| H                                                     | -1.372881 | 3.222016  | -3.147095 | H | -2.475964 | -4.344344 | -0.681850 |
| H                                                     | 0.397730  | 4.935992  | -3.414578 | H | -4.007484 | -3.514847 | -0.342600 |
| H                                                     | 1.695849  | 3.772398  | -3.140618 | H | -3.111334 | -3.193023 | -1.866566 |
| H                                                     | 0.733749  | 3.690171  | -4.628241 | N | 1.483064  | 0.911831  | 0.690369  |
| H                                                     | -1.004618 | 0.964745  | -2.632683 | S | 1.468809  | 1.463720  | 2.274071  |
| H                                                     | 2.001374  | 1.630538  | -2.961616 | C | 2.344844  | 1.638544  | -0.255962 |
| H                                                     | 1.128001  | 0.298020  | -3.725504 | C | 2.438734  | -1.009283 | 0.701105  |
| H                                                     | 0.878693  | -0.886845 | -1.602952 | H | 2.516026  | -0.994839 | 1.783859  |
| H                                                     | 2.565770  | -0.341301 | -1.647794 | C | 1.459400  | -1.889065 | 0.151631  |
| H                                                     | 1.502315  | 4.638205  | 3.874552  | H | 0.982522  | -2.520256 | 0.906554  |
| H                                                     | -0.186579 | 5.229755  | 3.703308  | C | 1.665397  | -2.591917 | -1.183358 |
| H                                                     | 0.135703  | 3.518268  | 4.037228  | H | 2.049491  | -1.931732 | -1.966995 |
| O                                                     | 1.622215  | 4.163630  | 1.455303  | H | 2.377096  | -3.424830 | -1.073092 |
| C                                                     | 0.387476  | 6.341271  | -1.386999 | H | 0.715280  | -3.002093 | -1.535024 |
| C                                                     | 0.180000  | 7.708211  | -1.607060 | N | -1.592468 | 1.131550  | -0.144614 |
| C                                                     | -1.118449 | 8.231303  | -1.586918 | C | -1.524354 | 2.127994  | -1.046945 |
| C                                                     | -2.209421 | 7.387454  | -1.346714 | C | -2.525738 | 3.086474  | -1.185895 |
| C                                                     | -2.001945 | 6.020514  | -1.126653 | C | -3.645422 | 3.012427  | -0.353935 |
| H                                                     | 1.397484  | 5.934380  | -1.402667 | C | -3.719729 | 1.976379  | 0.577309  |
| H                                                     | 1.028621  | 8.364605  | -1.793905 | C | -2.678163 | 1.050049  | 0.651342  |
| H                                                     | -1.279836 | 9.294588  | -1.758094 | H | -2.701362 | 0.199655  | 1.326282  |
| H                                                     | -3.219429 | 7.794345  | -1.331047 | H | -4.573319 | 1.870579  | 1.239645  |
| H                                                     | -2.850566 | 5.364120  | -0.939809 | H | -4.444349 | 3.744623  | -0.435291 |
|                                                       |           |           |           | H | -2.425100 | 3.867766  | -1.933088 |
|                                                       |           |           |           | H | -0.638865 | 2.146173  | -1.674203 |
|                                                       |           |           |           | H | 3.033884  | 2.281304  | 0.302752  |
|                                                       |           |           |           | C | 3.154144  | 0.613441  | -1.064066 |
|                                                       |           |           |           | H | 1.746446  | 2.272273  | -0.925309 |
|                                                       |           |           |           | C | 3.614093  | -0.474295 | -0.074721 |
|                                                       |           |           |           | H | 4.345156  | -0.048230 | 0.620551  |
| <b>Iso-13<sup>AP-TS</sup> (<i>cis</i> py-amidate)</b> |           |           |           |   |           |           |           |
| Pd                                                    | -0.035190 | -0.379120 | 0.011282  |   |           |           |           |
| O                                                     | -1.292246 | -1.775499 | -0.809223 |   |           |           |           |
| C                                                     | -2.244929 | -2.293416 | -0.083029 |   |           |           |           |
| O                                                     | -2.518193 | -1.970824 | 1.079646  |   |           |           |           |

|   |           |           |           |
|---|-----------|-----------|-----------|
| H | 4.097006  | -1.299410 | -0.615340 |
| H | 2.531731  | 0.173415  | -1.850460 |
| H | 4.010950  | 1.094442  | -1.550841 |
| O | 2.808294  | 1.980092  | 2.622352  |
| C | 0.354535  | 2.889986  | 2.310571  |
| O | 0.865228  | 0.404920  | 3.095667  |
| H | 0.381241  | 3.273331  | 3.333996  |
| H | 0.722535  | 3.647460  | 1.614658  |
| H | -0.651346 | 2.563012  | 2.047893  |

**17<sup>AP-TS</sup> (κ<sup>2</sup>-OAc)**

|    |           |           |           |
|----|-----------|-----------|-----------|
| C  | -1.731725 | 1.262066  | 1.756535  |
| S  | -1.409658 | 0.583443  | 0.112186  |
| O  | -2.559176 | 0.926710  | -0.743324 |
| N  | -0.083771 | 1.440477  | -0.457362 |
| Pd | -0.392282 | 3.447011  | -0.816703 |
| O  | -0.674594 | 5.516603  | -0.857903 |
| C  | -0.743229 | 5.598405  | 0.423421  |
| O  | -0.613128 | 4.539582  | 1.113538  |
| C  | 1.244455  | 0.818748  | -0.341305 |
| C  | 1.523524  | -0.001823 | -1.604899 |
| C  | 1.198649  | 0.902735  | -2.808798 |
| C  | -0.121706 | 1.597322  | -2.638591 |
| C  | -0.339114 | 2.984644  | -2.880010 |
| C  | 0.686549  | 3.889048  | -3.546841 |
| O  | -1.028308 | -0.831265 | 0.284720  |
| C  | -1.002042 | 6.931050  | 1.072632  |
| H  | 1.979633  | 1.622411  | -0.219793 |
| H  | 1.291445  | 0.186666  | 0.551858  |
| H  | -2.630095 | 0.763932  | 2.130352  |

|   |           |           |           |
|---|-----------|-----------|-----------|
| H | -1.880548 | 2.339936  | 1.672445  |
| H | -0.875467 | 1.038489  | 2.396569  |
| H | -1.372881 | 3.222016  | -3.147095 |
| H | 0.397730  | 4.935992  | -3.414578 |
| H | 1.695849  | 3.772398  | -3.140618 |
| H | 0.733749  | 3.690171  | -4.628241 |
| H | -1.004618 | 0.964745  | -2.632683 |
| H | 2.001374  | 1.630538  | -2.961616 |
| H | 1.128001  | 0.298020  | -3.725504 |
| H | 0.878693  | -0.886845 | -1.602952 |
| H | 2.565770  | -0.341301 | -1.647794 |
| H | -0.564800 | 6.957104  | 2.074015  |
| H | -0.602910 | 7.741376  | 0.456893  |
| H | -2.085358 | 7.076444  | 1.167366  |



|                                                           |           |           |           |           |           |           |           |
|-----------------------------------------------------------|-----------|-----------|-----------|-----------|-----------|-----------|-----------|
| <b>Iso-17<sup>AP-TS</sup> (<math>\kappa^1</math>-OAc)</b> |           |           |           | C         | -2.406433 | -3.061831 | 0.788373  |
|                                                           |           |           |           | H         | -2.358716 | -3.905185 | 0.095710  |
| N                                                         | 0.837731  | 2.340479  | 0.504328  | H         | -2.075443 | -3.398218 | 1.778567  |
| C                                                         | 0.461023  | 1.771427  | -1.549105 | H         | -3.436717 | -2.707439 | 0.890295  |
| C                                                         | -0.675553 | 0.901491  | -1.433014 |           |           |           |           |
| C                                                         | -2.076055 | 1.335414  | -1.828753 |           |           |           |           |
| H                                                         | -2.797397 | 0.579877  | -1.507289 | <b>9M</b> |           |           |           |
| H                                                         | -2.377687 | 2.290590  | -1.387129 |           |           |           |           |
| H                                                         | -2.156639 | 1.427682  | -2.922737 | Pd        | -0.000936 | -0.320019 | -1.041649 |
| H                                                         | -0.453000 | -0.149275 | -1.639342 | N         | -0.699005 | -1.212380 | -2.711553 |
| H                                                         | 1.425730  | 1.283843  | -1.651926 | S         | -2.169034 | -1.936078 | -2.601397 |
| C                                                         | 0.384688  | 3.190555  | -2.046617 | O         | -2.314405 | -2.373658 | -1.196698 |
| H                                                         | 0.880355  | 3.218627  | -3.027838 | O         | -2.290186 | -2.930498 | -3.688738 |
| H                                                         | -0.658615 | 3.480336  | -2.200527 | C         | -3.470750 | -0.710107 | -2.896208 |
| C                                                         | 1.055992  | 4.177951  | -1.073936 | H         | -3.380285 | 0.064786  | -2.133733 |
| C                                                         | 0.588355  | 3.780446  | 0.325057  | H         | -4.425052 | -1.238213 | -2.824357 |
| H                                                         | 2.148688  | 4.099829  | -1.128771 | H         | -3.346744 | -0.295784 | -3.900142 |
| H                                                         | 0.783884  | 5.210539  | -1.322567 | C         | -0.229530 | -0.750773 | -4.020810 |
| H                                                         | -0.486780 | 3.955992  | 0.444598  | H         | -0.776475 | 0.137954  | -4.377297 |
| H                                                         | 1.110059  | 4.345230  | 1.101938  | H         | -0.396170 | -1.560003 | -4.743558 |
| S                                                         | 2.201919  | 1.883884  | 1.397674  | C         | 1.272547  | -0.420317 | -3.961580 |
| O                                                         | 1.717560  | 0.936698  | 2.424026  | H         | 1.416882  | 0.582854  | -3.540798 |
| O                                                         | 2.952158  | 3.085067  | 1.799116  | H         | 1.660650  | -0.396017 | -4.987649 |
| C                                                         | 3.260088  | 0.922660  | 0.290682  | C         | 2.064368  | -1.453149 | -3.130763 |
| H                                                         | 2.707113  | 0.055985  | -0.077781 | H         | 1.742447  | -2.464548 | -3.397055 |
| H                                                         | 3.616461  | 1.560313  | -0.520998 | H         | 3.130505  | -1.376307 | -3.388216 |
| H                                                         | 4.100222  | 0.590466  | 0.905968  | C         | 1.964516  | -1.227007 | -1.636315 |
| Pd                                                        | -0.464350 | 0.752548  | 0.650220  | H         | 2.600807  | -0.423163 | -1.262371 |
| O                                                         | -0.603791 | -2.142303 | -0.526197 | C         | 1.421543  | -2.087616 | -0.691884 |
| C                                                         | -1.488616 | -1.943659 | 0.312592  | C         | 0.826640  | -3.446793 | -0.939090 |
| O                                                         | -1.734858 | -0.792681 | 0.891748  | H         | -0.067241 | -3.602270 | -0.327629 |



|   |           |           |          |   |           |           |           |
|---|-----------|-----------|----------|---|-----------|-----------|-----------|
| C | -0.549381 | -0.119771 | 3.800317 | H | 4.497901  | -0.232208 | -2.697006 |
| H | 0.565352  | 0.808346  | 2.185706 | H | -1.077874 | -0.442827 | -3.991491 |
| C | -0.185673 | 0.075033  | 2.466475 | H | -1.600434 | -0.610117 | -2.300429 |
| H | -0.065095 | 0.454339  | 4.585088 | H | -2.143491 | -1.801469 | -3.493304 |
| H | -1.852829 | -1.232927 | 5.120262 | H | 0.973495  | -4.868453 | -0.265982 |
| H | -2.915544 | -2.490771 | 3.217747 | H | -0.502274 | -5.652157 | -2.130761 |
| H | -2.137075 | -2.019661 | 0.882829 | H | 0.837592  | -6.549010 | -2.882830 |

**$\kappa^2$ -16M**

|    |           |           |           |   |          |           |           |
|----|-----------|-----------|-----------|---|----------|-----------|-----------|
| C  | 4.129037  | -0.547926 | -1.719795 | H | 3.007679 | -6.404536 | -3.131344 |
| S  | 4.654728  | -2.250847 | -1.438997 | H | 3.866821 | -7.042721 | -1.732544 |
| O  | 6.103971  | -2.327297 | -1.711520 | H | 5.518597 | -5.204457 | -1.815844 |
| O  | 4.163270  | -2.633563 | -0.095638 | H | 5.450695 | -6.048964 | -3.362363 |
| N  | 3.829470  | -3.076958 | -2.648674 |   |          |           |           |
| Pd | 1.871696  | -3.429092 | -2.276021 |   |          |           |           |
| O  | 1.079540  | -1.590203 | -3.153016 |   |          |           |           |
| C  | -0.096125 | -1.996925 | -2.889476 |   |          |           |           |
| O  | -0.228069 | -3.142601 | -2.323265 |   |          |           |           |
| C  | 4.603242  | -4.067579 | -3.409136 |   |          |           |           |
| C  | 4.881691  | -5.394147 | -2.688832 |   |          |           |           |
| C  | 3.593962  | -6.110522 | -2.252549 |   |          |           |           |
| C  | 2.768023  | -5.291803 | -1.294704 |   |          |           |           |
| C  | 1.390082  | -5.327021 | -1.163436 |   |          |           |           |
| C  | 0.429121  | -6.191417 | -1.934211 |   |          |           |           |
| C  | -1.305458 | -1.162312 | -3.201263 |   |          |           |           |
| H  | 4.038970  | -4.250314 | -4.333000 |   |          |           |           |
| H  | 5.555907  | -3.606994 | -3.694116 |   |          |           |           |
| H  | 4.570968  | 0.052496  | -0.920677 |   |          |           |           |
| H  | 3.039149  | -0.502775 | -1.688358 |   |          |           |           |

**10M**

|    |           |           |          |   |           |           |          |
|----|-----------|-----------|----------|---|-----------|-----------|----------|
|    |           |           |          | H | 4.348208  | -1.744401 | 2.511821 |
|    |           |           |          | H | 4.000980  | -0.489211 | 0.398948 |
| C  | 3.406738  | -1.203315 | 2.372223 | H | 2.747671  | -1.748172 | 0.339838 |
| C  | 3.109091  | -0.880508 | 0.901498 | O | -1.476368 | -0.086450 | 2.402216 |
| C  | 2.044755  | 0.213138  | 1.007352 | N | 0.006918  | 0.763565  | 5.609369 |
| N  | 2.444435  | 1.016323  | 2.228177 | C | -1.131461 | 0.038810  | 5.569759 |
| C  | 3.451239  | 0.167308  | 3.066042 | C | -1.919441 | -0.152552 | 6.703961 |
| Pd | 1.080638  | 1.019281  | 3.853975 | C | -1.532234 | 0.429950  | 7.911137 |
| O  | -0.607506 | 1.946193  | 2.834737 | C | -0.359363 | 1.187222  | 7.943469 |
| C  | -1.490837 | 1.157233  | 2.313668 | C | 0.384375  | 1.326042  | 6.774573 |
| C  | -2.623242 | 1.861251  | 1.567278 | H | -1.396105 | -0.366584 | 4.596171 |
| S  | 3.126420  | 2.597593  | 1.817626 | H | -2.824406 | -0.747099 | 6.626845 |
| O  | 3.646798  | 3.156424  | 3.068860 | H | -2.131773 | 0.299624  | 8.808009 |
| C  | 2.888157  | 0.295860  | 4.487924 | H | -0.017411 | 1.665088  | 8.856242 |
| C  | 2.924106  | -0.948731 | 5.367406 | H | 1.305723  | 1.897801  | 6.752708 |
| C  | 1.674229  | 3.527234  | 1.292421 |   |           |           |          |
| O  | 4.031283  | 2.424862  | 0.670212 |   |           |           |          |
| H  | 1.047269  | -0.191414 | 1.195585 |   |           |           |          |
| H  | 2.003418  | 0.856960  | 0.126466 |   |           |           |          |
| H  | 1.991430  | 4.573545  | 1.296204 |   |           |           |          |
| H  | 0.849269  | 3.344099  | 1.986808 |   |           |           |          |
| H  | 1.408668  | 3.215455  | 0.280875 |   |           |           |          |
| H  | -3.232627 | 1.137374  | 1.020819 |   |           |           |          |
| H  | -2.224525 | 2.612215  | 0.875945 |   |           |           |          |
| H  | -3.257932 | 2.392984  | 2.287132 |   |           |           |          |
| H  | 3.378914  | 1.135900  | 4.994110 |   |           |           |          |
| H  | 2.520187  | -0.727801 | 6.361632 |   |           |           |          |
| H  | 2.340484  | -1.781067 | 4.959407 |   |           |           |          |
| H  | 3.956000  | -1.309048 | 5.513194 |   |           |           |          |
| H  | 4.453565  | 0.599979  | 2.954896 |   |           |           |          |
| H  | 2.599181  | -1.817035 | 2.784915 |   |           |           |          |

14

|    |           |           |          |   |           |           |          |
|----|-----------|-----------|----------|---|-----------|-----------|----------|
|    |           |           |          | H | 4.126618  | -1.800473 | 1.950328 |
|    |           |           |          | H | 3.419056  | -0.233031 | 0.165475 |
|    |           |           |          | H | 2.113891  | -1.435698 | 0.183801 |
|    |           |           |          | O | -1.021718 | 1.842536  | 2.237708 |
| C  | 3.200885  | -1.233802 | 2.091899 |   |           |           |          |
| C  | 2.626651  | -0.674409 | 0.780699 |   |           |           |          |
| C  | 1.664976  | 0.414145  | 1.259294 |   |           |           |          |
| N  | 2.348604  | 0.999542  | 2.481258 |   |           |           |          |
| C  | 3.444765  | 0.012729  | 2.956708 |   |           |           |          |
| Pd | 1.307455  | 0.849332  | 4.309960 |   |           |           |          |
| O  | -0.649285 | 1.595377  | 4.441483 |   |           |           |          |
| C  | -1.412329 | 1.833482  | 3.419317 |   |           |           |          |
| C  | -2.868601 | 2.120480  | 3.763297 |   |           |           |          |
| S  | 3.022665  | 2.632707  | 2.182371 |   |           |           |          |
| O  | 3.947535  | 2.893786  | 3.289380 |   |           |           |          |
| C  | 3.135849  | -0.028425 | 4.455531 |   |           |           |          |
| C  | 3.064148  | -1.362259 | 5.177564 |   |           |           |          |
| C  | 1.569223  | 3.684886  | 2.309638 |   |           |           |          |
| O  | 3.519369  | 2.645445  | 0.799833 |   |           |           |          |
| H  | 0.692548  | 0.035114  | 1.573221 |   |           |           |          |
| H  | 1.489739  | 1.197881  | 0.521695 |   |           |           |          |
| H  | 1.828440  | 4.603350  | 1.776547 |   |           |           |          |
| H  | 1.383690  | 3.874734  | 3.367384 |   |           |           |          |
| H  | 0.706825  | 3.177673  | 1.864688 |   |           |           |          |
| H  | -3.438183 | 2.356723  | 2.861684 |   |           |           |          |
| H  | -2.929814 | 2.954803  | 4.471269 |   |           |           |          |
| H  | -3.310869 | 1.247486  | 4.257627 |   |           |           |          |
| H  | 3.758643  | 0.696294  | 4.992727 |   |           |           |          |
| H  | 2.799056  | -1.215925 | 6.231226 |   |           |           |          |
| H  | 2.332210  | -2.052046 | 4.741948 |   |           |           |          |
| H  | 4.041109  | -1.874158 | 5.163904 |   |           |           |          |
| H  | 4.431586  | 0.432306  | 2.731236 |   |           |           |          |
| H  | 2.468808  | -1.899009 | 2.562017 |   |           |           |          |

**18M**

|    |           |           |           |          |          |           |          |
|----|-----------|-----------|-----------|----------|----------|-----------|----------|
|    | H         | 2.431912  | -1.814166 | 2.414284 |          |           |          |
|    | H         | 4.159613  | -1.759476 | 2.032827 |          |           |          |
| C  | 2.866074  | -0.565514 | 0.698938  | H        | 3.741101 | -0.122916 | 0.209529 |
| C  | 1.872723  | 0.533207  | 1.080574  | H        | 2.424302 | -1.298852 | 0.016242 |
| N  | 2.409458  | 1.096113  | 2.378760  |          |          |           |          |
| C  | 3.401917  | 0.051135  | 2.985500  |          |          |           |          |
| C  | 3.240625  | -1.165462 | 2.061734  |          |          |           |          |
| Pd | 1.181787  | 0.966036  | 4.098693  |          |          |           |          |
| C  | 2.912825  | -0.030568 | 4.433660  |          |          |           |          |
| C  | 2.755340  | -1.386651 | 5.101197  |          |          |           |          |
| S  | 3.166119  | 2.692725  | 2.167996  |          |          |           |          |
| C  | 1.738852  | 3.792109  | 2.214118  |          |          |           |          |
| O  | -0.865150 | 2.006421  | 4.204650  |          |          |           |          |
| C  | -0.969784 | 1.467466  | 5.345334  |          |          |           |          |
| C  | -2.205775 | 1.646265  | 6.192623  |          |          |           |          |
| O  | -0.015592 | 0.730015  | 5.794713  |          |          |           |          |
| O  | 3.762911  | 2.748540  | 0.825597  |          |          |           |          |
| O  | 4.001500  | 2.917124  | 3.349153  |          |          |           |          |
| H  | 0.876289  | 0.132489  | 1.282236  |          |          |           |          |
| H  | 1.790932  | 1.322106  | 0.330677  |          |          |           |          |
| H  | 2.139820  | 4.794933  | 2.043473  |          |          |           |          |
| H  | 1.258110  | 3.713205  | 3.190138  |          |          |           |          |
| H  | 1.047875  | 3.517235  | 1.414994  |          |          |           |          |
| H  | -2.781385 | 2.509427  | 5.850410  |          |          |           |          |
| H  | -1.933239 | 1.761305  | 7.245890  |          |          |           |          |
| H  | -2.831906 | 0.749568  | 6.107458  |          |          |           |          |
| H  | 3.494632  | 0.650594  | 5.064551  |          |          |           |          |
| H  | 2.331054  | -1.258543 | 6.102290  |          |          |           |          |
| H  | 2.096130  | -2.066954 | 4.552338  |          |          |           |          |
| H  | 3.730906  | -1.887375 | 5.216806  |          |          |           |          |
| H  | 4.419675  | 0.448715  | 2.901706  |          |          |           |          |

**19<sup>BHE-TS</sup> (trans py-H)**

|    |           |           |   |          |           |           |
|----|-----------|-----------|---|----------|-----------|-----------|
|    |           |           | H | 3.313084 | -2.442258 | -1.662869 |
|    |           |           | C | 4.655286 | -0.771322 | -1.312326 |
| Pd | -0.018037 | -0.028422 | H | 5.238852 | -1.013246 | -2.206133 |
| H  | -0.253513 | -0.111018 | H | 4.587979 | 0.320995  | -1.245065 |
| C  | 1.488579  | 0.092585  | N | 4.133432 | -1.489302 | 0.877200  |
| C  | 2.109252  | -0.065749 | S | 4.297370 | -2.496045 | 2.197755  |
| N  | 0.054778  | 0.110978  | O | 3.089707 | -2.344886 | 3.020410  |
| O  | -2.101617 | -0.075578 | O | 5.635792 | -2.253470 | 2.747056  |
| C  | -2.629331 | 1.080285  | C | 5.291174 | -1.344331 | -0.040273 |
| O  | -1.995775 | 2.134408  | C | 4.283243 | -4.201754 | 1.578450  |
| C  | -4.152832 | 1.057134  | H | 4.399275 | -4.849558 | 2.450961  |
| H  | -4.574172 | 1.030890  | H | 5.120031 | -4.347455 | 0.891901  |
| H  | -4.515361 | 1.955051  | H | 3.326744 | -4.400245 | 1.089612  |
| H  | -4.499474 | 0.158985  | H | 5.760065 | -2.317446 | -0.248791 |
| C  | 0.136399  | 1.323271  | H | 6.047437 | -0.696003 | 0.407652  |
| C  | 0.001738  | 1.501425  |   |          |           |           |
| C  | -0.241056 | 0.388628  |   |          |           |           |
| C  | -0.345236 | -0.866419 |   |          |           |           |
| C  | -0.193031 | -0.959696 |   |          |           |           |
| H  | -0.280727 | -1.911984 |   |          |           |           |
| H  | -0.547947 | -1.760384 |   |          |           |           |
| H  | -0.357281 | 0.497125  |   |          |           |           |
| H  | 0.070532  | 2.500161  |   |          |           |           |
| H  | 0.278393  | 2.163002  |   |          |           |           |
| H  | 1.413283  | 1.084248  |   |          |           |           |
| H  | 1.506561  | -0.727605 |   |          |           |           |
| H  | 2.507044  | 0.830665  |   |          |           |           |
| C  | 2.816930  | -1.361774 |   |          |           |           |
| H  | 2.175631  | -2.209173 |   |          |           |           |
| C  | 3.252099  | -1.400964 |   |          |           |           |
| H  | 2.548766  | -0.874938 |   |          |           |           |

**19<sup>1°</sup>-BHE-TS (cis py-H)**

|    |           |           |           |           |           |           |           |
|----|-----------|-----------|-----------|-----------|-----------|-----------|-----------|
|    |           |           | H         | -4.201660 | 2.104458  | 1.026326  |           |
|    |           |           | H         | -1.240040 | 2.205504  | 0.229486  |           |
| Pd | -3.244590 | 0.242324  | -0.549640 | H         | -1.967307 | 1.303612  | 1.650677  |
| H  | -1.708255 | 0.312266  | -0.192527 | H         | -5.424622 | 2.402180  | -1.469775 |
| C  | -2.117367 | 1.735572  | 0.664433  | N         | -2.982075 | -1.733102 | -1.367495 |
| C  | -3.399889 | 2.195305  | 0.294139  | C         | -3.668866 | -2.761504 | -0.829750 |
| O  | -5.300690 | 0.214472  | -1.090354 | C         | -3.553034 | -4.062967 | -1.319028 |
| C  | -6.109244 | -0.403553 | -0.283471 | C         | -2.708958 | -4.311670 | -2.401133 |
| C  | -7.580888 | -0.315636 | -0.682813 | C         | -2.002940 | -3.243454 | -2.958735 |
| O  | -5.765858 | -1.020163 | 0.739016  | C         | -2.163688 | -1.973747 | -2.409741 |
| H  | -8.182954 | -0.994017 | -0.073756 | H         | -4.330434 | -2.505293 | -0.006818 |
| H  | -7.706103 | -0.550945 | -1.745236 | H         | -4.125265 | -4.858998 | -0.852822 |
| H  | -7.941572 | 0.709807  | -0.532910 | H         | -2.602742 | -5.315527 | -2.803612 |
| C  | -4.984685 | 3.394113  | -1.341803 | H         | -1.334608 | -3.384097 | -3.802639 |
| C  | -3.573291 | 3.315045  | -0.726594 | H         | -1.628515 | -1.117065 | -2.805624 |
| C  | -5.757642 | 4.298369  | -0.367674 |           |           |           |           |
| C  | -4.734564 | 5.378853  | 0.007683  |           |           |           |           |
| N  | -3.442612 | 4.647482  | -0.042458 |           |           |           |           |
| S  | -2.030956 | 5.523933  | -0.139852 |           |           |           |           |
| O  | -0.914384 | 4.572932  | -0.033698 |           |           |           |           |
| O  | -2.162583 | 6.654241  | 0.786186  |           |           |           |           |
| C  | -1.949662 | 6.222837  | -1.812977 |           |           |           |           |
| H  | -2.805981 | 6.881346  | -1.973493 |           |           |           |           |
| H  | -1.021392 | 6.797052  | -1.866763 |           |           |           |           |
| H  | -1.932250 | 5.409958  | -2.542661 |           |           |           |           |
| H  | -4.754493 | 6.200692  | -0.723418 |           |           |           |           |
| H  | -4.884216 | 5.807603  | 1.001094  |           |           |           |           |
| H  | -6.661215 | 4.729874  | -0.809887 |           |           |           |           |
| H  | -6.061537 | 3.736198  | 0.523383  |           |           |           |           |
| H  | -4.922989 | 3.877514  | -2.326155 |           |           |           |           |
| H  | -2.800071 | 3.216565  | -1.495454 |           |           |           |           |



**11M**

|    |           |           |           |   |           |           |           |
|----|-----------|-----------|-----------|---|-----------|-----------|-----------|
|    |           |           |           | H | -3.621615 | 0.309569  | 1.952085  |
|    |           |           |           | H | -1.029412 | -0.140920 | 1.324730  |
| Pd | 1.081183  | -0.800305 | -0.692457 | H | -1.879306 | -1.393492 | 2.259933  |
| N  | 2.869633  | -0.051189 | 0.187497  | C | -1.727246 | -1.862727 | 0.144897  |
| C  | 2.861752  | 1.177396  | 0.744845  | C | -1.040631 | -1.285068 | -1.079955 |
| C  | 4.017335  | -0.758036 | 0.181531  | H | -1.204931 | -2.773520 | 0.454082  |
| C  | 4.005928  | 1.734047  | 1.315678  | H | -1.426846 | -0.322553 | -1.408103 |
| H  | 1.910458  | 1.702323  | 0.716971  | C | -0.242507 | -2.007548 | -1.948856 |
| C  | 5.201156  | -0.261260 | 0.720170  | H | -0.024236 | -1.616991 | -2.939828 |
| H  | 3.970085  | -1.743300 | -0.268311 | H | -0.060443 | -3.065060 | -1.787250 |
| C  | 5.197051  | 1.008550  | 1.301385  | C | -3.651160 | -4.710233 | 0.838249  |
| H  | 3.951221  | 2.724441  | 1.756628  | H | -3.962872 | -5.711055 | 0.529167  |
| H  | 6.102042  | -0.865780 | 0.684125  | H | -2.649527 | -4.746129 | 1.272808  |
| H  | 6.104086  | 1.421824  | 1.734196  | H | -4.375143 | -4.293995 | 1.542134  |
| O  | 0.803975  | 0.946121  | -1.912664 | H | 1.286521  | -2.103731 | 0.125814  |
| C  | 0.243399  | 1.963586  | -1.346690 |   |           |           |           |
| O  | -0.087118 | 2.011289  | -0.143022 |   |           |           |           |
| C  | 0.003558  | 3.157436  | -2.266239 |   |           |           |           |
| H  | -0.627329 | 2.858913  | -3.111479 |   |           |           |           |
| H  | -0.474823 | 3.974314  | -1.720881 |   |           |           |           |
| H  | 0.956433  | 3.501618  | -2.685078 |   |           |           |           |
| N  | -3.152915 | -2.161342 | -0.195890 |   |           |           |           |
| S  | -3.617751 | -3.691505 | -0.663209 |   |           |           |           |
| C  | -4.106654 | -1.305499 | 0.551903  |   |           |           |           |
| O  | -5.002767 | -3.590183 | -1.136356 |   |           |           |           |
| O  | -2.550343 | -4.232121 | -1.514177 |   |           |           |           |
| C  | -3.213357 | -0.165553 | 1.054690  |   |           |           |           |
| H  | -4.914176 | -0.980798 | -0.107695 |   |           |           |           |
| H  | -4.553658 | -1.851656 | 1.396842  |   |           |           |           |
| C  | -1.860001 | -0.851022 | 1.305990  |   |           |           |           |
| H  | -3.108527 | 0.609456  | 0.287615  |   |           |           |           |

**20<sup>2°</sup>-BHE-TS (cis py-H)**

|    |           |           |           |   |           |           |           |
|----|-----------|-----------|-----------|---|-----------|-----------|-----------|
|    |           |           |           | H | 5.771245  | 2.629705  | -1.460897 |
|    |           |           |           | H | 5.875231  | 1.004883  | -2.219117 |
| O  | 4.134654  | -0.097309 | -0.667735 | H | 1.815634  | 2.224155  | 6.455378  |
| Pd | 2.411318  | -0.672818 | 0.409720  | N | 1.171800  | -0.263858 | -1.311897 |
| H  | 1.201565  | -1.188848 | 1.314262  | N | 1.807230  | -0.344186 | 4.896567  |
| C  | 3.525664  | -1.080263 | 2.128701  | C | 1.167892  | 0.987627  | -1.814714 |
| H  | 4.116414  | -0.198004 | 2.356686  | C | 0.430236  | 1.326420  | -2.949285 |
| H  | 4.092462  | -1.993361 | 1.956715  | C | -0.320644 | 0.342418  | -3.592575 |
| C  | 2.194468  | -1.167382 | 2.612095  | C | -0.309602 | -0.954070 | -3.073765 |
| H  | 1.812219  | -2.156458 | 2.864291  | C | 0.445230  | -1.212875 | -1.931803 |
| C  | 1.595540  | -0.030945 | 3.450746  | H | 1.788814  | 1.707171  | -1.287177 |
| C  | 0.060815  | 0.125877  | 3.368234  | H | 0.457740  | 2.347549  | -3.316974 |
| H  | -0.329915 | -0.110337 | 2.375787  | H | -0.900315 | 0.578172  | -4.481095 |
| C  | 2.754826  | 2.084949  | 5.915424  | H | -0.873098 | -1.756348 | -3.540195 |
| H  | 3.583464  | 2.504818  | 6.491180  | H | 0.480754  | -2.204694 | -1.492877 |
| H  | 2.718863  | 2.543487  | 4.924655  |   |           |           |           |
| H  | -0.204401 | 1.167685  | 3.588341  |   |           |           |           |
| C  | -0.470479 | -0.793020 | 4.479388  |   |           |           |           |
| C  | 0.528449  | -0.565203 | 5.618550  |   |           |           |           |
| H  | -0.450916 | -1.841806 | 4.158905  |   |           |           |           |
| H  | 0.625225  | -1.410986 | 6.302036  |   |           |           |           |
| H  | 0.245726  | 0.318792  | 6.209726  |   |           |           |           |
| H  | -1.495805 | -0.555382 | 4.779473  |   |           |           |           |
| S  | 3.093850  | 0.311622  | 5.745652  |   |           |           |           |
| O  | 3.030998  | -0.272044 | 7.090415  |   |           |           |           |
| O  | 4.289604  | 0.186988  | 4.907885  |   |           |           |           |
| H  | 2.104359  | 0.896785  | 3.169763  |   |           |           |           |
| C  | 4.399943  | 1.170133  | -0.634933 |   |           |           |           |
| O  | 3.670302  | 2.040181  | -0.121812 |   |           |           |           |
| C  | 5.728085  | 1.552431  | -1.282531 |   |           |           |           |
| H  | 6.548787  | 1.273945  | -0.609652 |   |           |           |           |

21

|    |          |           |           |          |           |           |           |
|----|----------|-----------|-----------|----------|-----------|-----------|-----------|
|    |          |           | H         | 5.901133 | -3.103788 | -3.011315 |           |
|    |          |           | H         | 4.543707 | -2.067499 | -2.572720 |           |
| C  | 4.645251 | -2.512360 | -4.718140 | H        | 6.821218  | 0.847384  | -2.618795 |
| C  | 5.301000 | -2.249243 | -3.340836 | H        | 6.159709  | -0.324227 | -1.478551 |
| C  | 6.222910 | -1.011792 | -3.511159 | O        | 2.016155  | -0.549489 | -6.490614 |
| N  | 5.850406 | -0.476324 | -4.905134 | C        | 1.353440  | 1.774506  | -4.484770 |
| C  | 5.490818 | -1.702519 | -5.700250 | C        | 0.266980  | 2.618581  | -4.259006 |
| C  | 6.031356 | 0.102129  | -2.486876 | C        | 0.489658  | 3.897941  | -3.749045 |
| C  | 4.656990 | 0.763597  | -2.651897 | C        | 1.801762  | 4.291454  | -3.479717 |
| Pd | 4.190425 | 0.866233  | -4.633728 | C        | 2.837263  | 3.392084  | -3.719854 |
| O  | 3.724348 | 0.894396  | -6.770739 | H        | 1.242873  | 0.783346  | -4.915576 |
| C  | 2.727581 | 0.186192  | -7.199722 | H        | -0.733723 | 2.267607  | -4.490874 |
| C  | 2.462589 | 0.298164  | -8.701061 | H        | -0.339994 | 4.576088  | -3.568343 |
| S  | 7.276572 | 0.360235  | -5.630698 | H        | 2.029823  | 5.278050  | -3.088532 |
| O  | 7.449343 | 1.620488  | -4.903535 | H        | 3.870648  | 3.653325  | -3.522381 |
| N  | 2.619616 | 2.156400  | -4.213341 |          |           |           |           |
| C  | 6.737638 | 0.704169  | -7.313594 |          |           |           |           |
| O  | 8.381741 | -0.611603 | -5.669914 |          |           |           |           |
| H  | 2.396586 | 1.350598  | -8.998755 |          |           |           |           |
| H  | 3.297434 | -0.142639 | -9.260867 |          |           |           |           |
| H  | 1.541331 | -0.224480 | -8.969150 |          |           |           |           |
| H  | 4.641831 | 1.756932  | -2.186619 |          |           |           |           |
| H  | 3.853279 | 0.169446  | -2.193799 |          |           |           |           |
| H  | 7.267965 | -1.340048 | -3.551864 |          |           |           |           |
| H  | 7.440633 | 1.458997  | -7.676406 |          |           |           |           |
| H  | 5.707369 | 1.075578  | -7.302043 |          |           |           |           |
| H  | 6.826193 | -0.212551 | -7.898672 |          |           |           |           |
| H  | 6.410955 | -2.236836 | -5.969607 |          |           |           |           |
| H  | 4.948173 | -1.407171 | -6.597836 |          |           |           |           |
| H  | 4.638310 | -3.573117 | -4.988901 |          |           |           |           |
| H  | 3.613697 | -2.149352 | -4.746882 |          |           |           |           |

**22**

|    |           |           |           |
|----|-----------|-----------|-----------|
| Pd | 1.062625  | -1.556275 | -1.301228 |
| H  | 2.251694  | -1.361684 | -0.334880 |
| O  | -0.849561 | -1.913793 | -1.993953 |
| C  | -1.561846 | -1.601744 | -3.036052 |
| O  | -1.097857 | -1.116413 | -4.078771 |
| C  | -3.048569 | -1.896437 | -2.898085 |
| H  | -3.199714 | -2.970365 | -2.738314 |
| H  | -3.585117 | -1.580332 | -3.795444 |
| H  | -3.454050 | -1.378666 | -2.021431 |
| N  | 2.449460  | -1.246152 | -2.764258 |
| C  | 1.961100  | -1.017311 | -4.003931 |
| C  | 2.810567  | -0.803606 | -5.089689 |
| C  | 4.190744  | -0.831494 | -4.900656 |
| C  | 4.684016  | -1.073092 | -3.616266 |
| C  | 3.788737  | -1.272696 | -2.571808 |
| H  | 4.126545  | -1.458498 | -1.561600 |
| H  | 5.749875  | -1.106655 | -3.413779 |
| H  | 4.870104  | -0.669681 | -5.733033 |
| H  | 2.372465  | -0.621648 | -6.065801 |
| H  | 0.872586  | -1.013126 | -4.106724 |

**23**

|    |          |          |          |
|----|----------|----------|----------|
| Pd | 0.223391 | 1.076890 | 2.583224 |
| N  | 2.218359 | 1.508125 | 2.715177 |
| C  | 2.614865 | 2.601146 | 2.025691 |
| C  | 3.938342 | 3.031810 | 2.010943 |
| C  | 4.893522 | 2.313154 | 2.732136 |
| C  | 4.482871 | 1.184982 | 3.443688 |

|   |           |           |           |
|---|-----------|-----------|-----------|
| C | 3.141310  | 0.812713  | 3.412774  |
| H | 2.777030  | -0.054277 | 3.948791  |
| H | 5.186451  | 0.592427  | 4.019959  |
| H | 5.934074  | 2.625260  | 2.739448  |
| H | 4.204592  | 3.916238  | 1.440943  |
| H | 1.833258  | 3.123816  | 1.482382  |
| H | 0.442735  | -0.142968 | 3.494774  |
| O | -0.730213 | 2.641005  | 1.266043  |
| C | -1.819241 | 2.017400  | 1.463067  |
| O | -1.826094 | 0.972127  | 2.209908  |
| C | -3.104573 | 2.462281  | 0.812679  |
| H | -3.081237 | 3.538667  | 0.624057  |
| H | -3.213753 | 1.946743  | -0.149662 |
| H | -3.962507 | 2.199361  | 1.437192  |

**25**

|    |           |           |           |    |           |           |           |
|----|-----------|-----------|-----------|----|-----------|-----------|-----------|
| C  | 2.318998  | -1.092639 | 0.353995  | C  | -4.601253 | 0.198760  | -0.403189 |
| N  | 1.602574  | -0.024317 | -0.057541 | Pd | -0.565010 | -0.687974 | 0.835978  |
| C  | 2.255230  | 1.137874  | -0.275309 | O  | 1.349761  | -1.234266 | 0.909688  |
| C  | 3.630748  | 1.268487  | -0.100271 | C  | 2.087497  | -1.195550 | -0.182645 |
| C  | 4.368873  | 0.160585  | 0.319339  | C  | 3.500038  | -1.719755 | 0.053078  |
| C  | 3.696855  | -1.040808 | 0.550246  | O  | 1.718724  | -0.782178 | -1.279450 |
| Pd | -0.451654 | -0.166892 | -0.351179 | H  | -0.230461 | 0.763828  | 0.546322  |
| O  | -2.454404 | -0.292218 | -0.597375 | H  | -2.640964 | -0.215002 | -1.235360 |
| C  | -3.198180 | 0.166724  | 0.366796  | H  | -5.083606 | 0.289739  | -1.371171 |
| C  | -4.692908 | 0.041274  | 0.102995  | H  | -6.377890 | 0.588618  | 0.766640  |
| O  | -2.777552 | 0.670175  | 1.421042  | H  | -5.143187 | 0.365584  | 2.948060  |
| H  | -0.860774 | 0.456117  | 0.985019  | H  | -2.699703 | -0.140169 | 2.897298  |
| H  | 1.755658  | -2.002060 | 0.531951  | H  | 4.040528  | -1.777206 | -0.894144 |
| H  | 4.223685  | -1.929675 | 0.882704  | H  | 4.031953  | -1.046933 | 0.736140  |
| H  | 5.442737  | 0.232895  | 0.467181  | H  | 3.469348  | -2.706321 | 0.528195  |
| H  | 4.105068  | 2.226479  | -0.288469 |    |           |           |           |
| H  | 1.641373  | 1.973683  | -0.591652 |    |           |           |           |
| H  | -5.262403 | 0.420876  | 0.953276  |    |           |           |           |
| H  | -4.957430 | 0.603708  | -0.799482 |    |           |           |           |
| H  | -4.951912 | -1.007427 | -0.079580 |    |           |           |           |

**24<sup>TS</sup>**

|   |           |           |           |
|---|-----------|-----------|-----------|
| C | -3.239473 | -0.085475 | -0.340266 |
| N | -2.581679 | -0.212141 | 0.832511  |
| C | -3.271459 | -0.044082 | 1.980697  |
| C | -4.634321 | 0.240813  | 1.997502  |
| C | -5.315095 | 0.364333  | 0.784960  |

**26<sup>TS</sup>**

|    |           |           |   |           |           |           |
|----|-----------|-----------|---|-----------|-----------|-----------|
|    |           |           | C | -0.149733 | 3.103145  | 2.738024  |
|    |           |           | H | -0.216748 | 3.815314  | 3.555897  |
| Pd | -0.494601 | -0.415491 | C | 0.059351  | 1.745117  | 2.985125  |
| H  | -0.097715 | 0.775590  | H | 0.159866  | 1.363303  | 3.996688  |
| O  | 1.651738  | 1.143061  | C | 0.141975  | 0.863336  | 1.909630  |
| C  | 2.172464  | 0.201160  | H | 0.306459  | -0.197128 | 2.061191  |
| O  | 1.524037  | -0.665022 | H | 2.030634  | -0.346925 | -1.899660 |
| N  | -2.549121 | -0.096634 | O | 2.363402  | -0.929081 | -2.661790 |
| C  | -3.271158 | -0.240112 | C | 1.307451  | -1.632036 | -3.053660 |
| C  | -4.649815 | -0.046931 | O | 0.201056  | -1.506752 | -2.517354 |
| C  | -5.318430 | 0.310488  | C | 1.568596  | -2.579952 | -4.187758 |
| C  | -4.575318 | 0.463124  | H | 1.937838  | -2.026057 | -5.057753 |
| C  | -3.198888 | 0.254449  | H | 2.347170  | -3.295459 | -3.901315 |
| H  | -2.582954 | 0.373903  | H | 0.651882  | -3.111408 | -4.446278 |
| H  | -5.045847 | 0.744962  |   |           |           |           |
| H  | -6.393028 | 0.470154  |   |           |           |           |
| H  | -5.180842 | -0.174151 |   |           |           |           |
| H  | -2.710348 | -0.511542 |   |           |           |           |
| C  | 3.679124  | -0.007550 |   |           |           |           |
| H  | 4.161554  | 0.768425  |   |           |           |           |
| H  | 3.906110  | -0.992973 |   |           |           |           |
| H  | 4.075341  | 0.008431  |   |           |           |           |

**27**

|    |           |           |           |
|----|-----------|-----------|-----------|
| Pd | 0.064331  | -0.101499 | -0.915824 |
| N  | 0.027570  | 1.261170  | 0.621326  |
| C  | -0.175294 | 2.578988  | 0.390030  |
| H  | -0.261104 | 2.866227  | -0.651423 |
| C  | -0.269055 | 3.521672  | 1.411495  |
| H  | -0.432195 | 4.565498  | 1.160456  |

**29M**

|    |            |           |   |           |          |           |
|----|------------|-----------|---|-----------|----------|-----------|
|    |            |           | H | -3.626885 | 3.988267 | -2.414080 |
|    |            |           | C | -4.574887 | 4.000248 | -1.868908 |
| Pd | -4.753518  | 0.814807  | H | -4.584207 | 4.894034 | -1.232698 |
| H  | -3.692121  | 0.067287  | H | -5.417859 | 4.059102 | -2.561786 |
| C  | -6.180275  | -0.069561 |   |           |          |           |
| C  | -6.042642  | -0.927912 |   |           |          |           |
| H  | -7.013924  | 0.627031  |   |           |          |           |
| H  | -5.675220  | -0.278359 |   |           |          |           |
| H  | -5.398619  | -1.800769 |   |           |          |           |
| C  | -7.026990  | -0.980083 |   |           |          |           |
| H  | -7.534840  | -0.013587 |   |           |          |           |
| C  | -6.378395  | -1.383345 |   |           |          |           |
| H  | -5.347109  | -1.028067 |   |           |          |           |
| H  | -6.946431  | -0.936439 |   |           |          |           |
| C  | -6.505163  | -2.915425 |   |           |          |           |
| H  | -5.734005  | -3.384840 |   |           |          |           |
| H  | -6.414529  | -3.327721 |   |           |          |           |
| C  | -7.893207  | -3.164179 |   |           |          |           |
| H  | -8.671003  | -3.071865 |   |           |          |           |
| H  | -8.003023  | -4.139518 |   |           |          |           |
| N  | -8.007015  | -2.084870 |   |           |          |           |
| S  | -9.488921  | -1.781764 |   |           |          |           |
| O  | -10.108485 | -3.087648 |   |           |          |           |
| O  | -9.261096  | -0.819595 |   |           |          |           |
| C  | -10.501934 | -0.938783 |   |           |          |           |
| H  | -11.472140 | -0.745568 |   |           |          |           |
| H  | -10.023040 | 0.003728  |   |           |          |           |
| H  | -10.625996 | -1.591351 |   |           |          |           |
| O  | -3.642996  | 2.313234  |   |           |          |           |
| C  | -4.694812  | 2.779495  |   |           |          |           |
| O  | -5.819609  | 2.221884  |   |           |          |           |

**28<sup>1°</sup>-BHE-TS**

|    |           |           |           |   |           |           |           |
|----|-----------|-----------|-----------|---|-----------|-----------|-----------|
| H  | 3.157830  | -0.179246 | 1.007288  | H | -2.718712 | -0.620771 | 1.285257  |
| Pd | 1.716343  | -0.127548 | 0.397226  | H | -2.020425 | -0.525509 | 2.937521  |
| C  | 3.704333  | 0.069311  | -0.562080 | H | -2.333685 | 0.951888  | 2.001937  |
| C  | 2.651088  | -0.003215 | -1.503578 | H | 1.995646  | -4.553346 | -2.166692 |
| H  | 4.387018  | -0.769192 | -0.443744 |   |           |           |           |
| H  | 4.135826  | 1.038131  | -0.321742 |   |           |           |           |
| C  | 2.448463  | -1.193867 | -2.428045 |   |           |           |           |
| H  | 2.281275  | 0.932883  | -1.919271 |   |           |           |           |
| H  | 2.995196  | -0.954231 | -3.352563 |   |           |           |           |
| C  | 2.918542  | -2.567692 | -1.905539 |   |           |           |           |
| C  | 2.030779  | -3.572976 | -2.652846 |   |           |           |           |
| C  | 0.667297  | -2.871757 | -2.667380 |   |           |           |           |
| N  | 1.010787  | -1.431083 | -2.753524 |   |           |           |           |
| S  | 0.287970  | -0.495720 | -3.953659 |   |           |           |           |
| O  | 1.134360  | 0.699921  | -4.105227 |   |           |           |           |
| O  | -0.037788 | -1.315855 | -5.132957 |   |           |           |           |
| C  | -1.268639 | -0.008247 | -3.192065 |   |           |           |           |
| H  | -1.060154 | 0.458911  | -2.228449 |   |           |           |           |
| H  | -1.881479 | -0.902239 | -3.056921 |   |           |           |           |
| H  | -1.753685 | 0.681662  | -3.887628 |   |           |           |           |
| H  | 0.045505  | -3.168668 | -3.515530 |   |           |           |           |
| H  | 0.112928  | -3.054473 | -1.737669 |   |           |           |           |
| H  | 2.389279  | -3.712612 | -3.679892 |   |           |           |           |
| H  | 3.987120  | -2.723771 | -2.085839 |   |           |           |           |
| H  | 2.739122  | -2.640563 | -0.825562 |   |           |           |           |
| O  | -0.452733 | -0.077602 | 0.083270  |   |           |           |           |
| C  | -0.624216 | -0.143322 | 1.347561  |   |           |           |           |
| O  | 0.394549  | -0.227988 | 2.108620  |   |           |           |           |
| C  | -2.012174 | -0.094731 | 1.933510  |   |           |           |           |



**30**<sup>2°-BHE-TS</sup>

|    |          |           |           |
|----|----------|-----------|-----------|
| H  | 3.982039 | -0.287176 | -0.689934 |
| Pd | 2.811290 | -0.642228 | 0.291232  |
| C  | 4.267711 | -1.674442 | 1.381160  |
| C  | 4.963743 | -1.314468 | 0.202970  |
| C  | 5.307392 | -2.347394 | -0.877104 |
| C  | 5.500794 | -1.777248 | -2.299231 |
| C  | 6.982781 | -1.370823 | -2.338144 |
| C  | 7.675621 | -2.507717 | -1.577215 |
| N  | 6.656463 | -2.907050 | -0.573067 |
| S  | 6.833475 | -4.373903 | 0.212381  |
| C  | 6.422681 | -5.666407 | -0.991951 |
| O  | 5.809189 | -4.433226 | 1.260548  |
| O  | 8.261217 | -4.508481 | 0.516990  |
| H  | 6.545875 | -6.621457 | -0.475073 |
| H  | 5.385341 | -5.545237 | -1.312212 |
| H  | 7.110961 | -5.608733 | -1.837933 |
| H  | 7.911021 | -3.340284 | -2.255990 |
| H  | 8.598972 | -2.208843 | -1.076830 |
| H  | 7.370242 | -1.263862 | -3.355851 |
| H  | 7.137296 | -0.415356 | -1.822819 |
| H  | 5.312667 | -2.572752 | -3.031162 |
| H  | 4.814550 | -0.956429 | -2.522456 |
| H  | 4.546166 | -3.133516 | -0.856644 |
| H  | 5.682093 | -0.498384 | 0.277482  |
| H  | 3.938431 | -2.701521 | 1.516943  |
| H  | 4.446320 | -1.116056 | 2.298472  |
| O  | 0.943706 | -0.815008 | 1.381967  |
| C  | 0.363222 | -0.105290 | 0.494146  |
| O  | 1.038822 | 0.321053  | -0.501687 |

|   |           |           |           |
|---|-----------|-----------|-----------|
| C | -1.094641 | 0.249520  | 0.634910  |
| H | -1.182442 | 1.155170  | 1.247861  |
| H | -1.635263 | -0.554634 | 1.141149  |
| H | -1.535651 | 0.453525  | -0.343999 |

**31**

|    |           |          |           |
|----|-----------|----------|-----------|
| Pd | -4.771864 | 0.837448 | 0.589059  |
| H  | -3.806581 | 0.018279 | 1.453486  |
| O  | -6.535648 | 0.307829 | 1.504155  |
| C  | -7.260896 | 1.022466 | 0.701573  |
| O  | -6.689379 | 1.705945 | -0.191712 |
| C  | -8.756496 | 0.969235 | 0.846008  |
| H  | -9.042413 | 0.918861 | 1.900320  |
| H  | -9.128534 | 0.063691 | 0.351674  |
| H  | -9.206147 | 1.841760 | 0.366490  |

32

|    |          |           |           |   |          |           |           |
|----|----------|-----------|-----------|---|----------|-----------|-----------|
|    |          |           |           | H | 6.269611 | -3.253479 | -3.268051 |
|    |          |           |           | H | 4.945034 | -2.467973 | -2.407425 |
| C  | 5.537213 | -2.441528 | -3.327226 | H | 6.639673 | 0.804524  | -2.517409 |
| C  | 6.278740 | -1.084576 | -3.471244 | H | 6.099404 | -0.466719 | -1.417733 |
| N  | 5.819311 | -0.551265 | -4.851166 |   |          |           |           |
| C  | 5.368743 | -1.758918 | -5.631970 |   |          |           |           |
| C  | 4.652472 | -2.601356 | -4.580455 |   |          |           |           |
| C  | 5.941409 | -0.031826 | -2.418323 |   |          |           |           |
| C  | 4.506095 | 0.461421  | -2.600682 |   |          |           |           |
| Pd | 4.194446 | 0.803279  | -4.559904 |   |          |           |           |
| O  | 2.555661 | 2.098188  | -4.489355 |   |          |           |           |
| C  | 2.488431 | 2.244300  | -5.763402 |   |          |           |           |
| C  | 1.438084 | 3.163467  | -6.336154 |   |          |           |           |
| S  | 7.206091 | 0.263040  | -5.662815 |   |          |           |           |
| C  | 6.466874 | 0.912506  | -7.172209 |   |          |           |           |
| O  | 3.312171 | 1.636838  | -6.514109 |   |          |           |           |
| O  | 8.180833 | -0.777275 | -6.024642 |   |          |           |           |
| O  | 7.609776 | 1.367390  | -4.791969 |   |          |           |           |
| H  | 0.528099 | 3.131296  | -5.730687 |   |          |           |           |
| H  | 1.816995 | 4.192965  | -6.318971 |   |          |           |           |
| H  | 1.219767 | 2.893050  | -7.372205 |   |          |           |           |
| H  | 4.307777 | 1.397528  | -2.068083 |   |          |           |           |
| H  | 3.752001 | -0.281323 | -2.304605 |   |          |           |           |
| H  | 7.358779 | -1.259705 | -3.517676 |   |          |           |           |
| H  | 7.257977 | 1.516889  | -7.624837 |   |          |           |           |
| H  | 5.591248 | 1.519175  | -6.932374 |   |          |           |           |
| H  | 6.206941 | 0.079924  | -7.827612 |   |          |           |           |
| H  | 6.246785 | -2.285606 | -6.025188 |   |          |           |           |
| H  | 4.727504 | -1.441175 | -6.457352 |   |          |           |           |
| H  | 4.556518 | -3.643273 | -4.902343 |   |          |           |           |
| H  | 3.647565 | -2.204089 | -4.405385 |   |          |           |           |

34

|    |           |           |           |   |           |           |           |
|----|-----------|-----------|-----------|---|-----------|-----------|-----------|
|    |           |           |           | H | -3.036510 | -1.204617 | -0.969483 |
|    |           |           |           | H | -4.271192 | -0.534387 | 0.112063  |
| N  | -1.120431 | -0.936766 | 1.021492  | H | -2.578810 | -2.477377 | 1.052957  |
| C  | -0.969549 | 0.313771  | 0.231161  | H | -2.972375 | -1.088179 | 2.090402  |
| C  | -2.445336 | 0.690675  | -0.074692 |   |           |           |           |
| C  | -3.193546 | -0.651296 | -0.036912 |   |           |           |           |
| C  | -2.528089 | -1.389572 | 1.129540  |   |           |           |           |
| C  | -0.144954 | 0.122643  | -1.034776 |   |           |           |           |
| C  | 0.175330  | -1.105777 | -1.599192 |   |           |           |           |
| Pd | 1.931633  | -0.348310 | -0.572442 |   |           |           |           |
| O  | 1.324835  | -1.053964 | 1.590868  |   |           |           |           |
| S  | 0.000205  | -1.405461 | 2.147436  |   |           |           |           |
| C  | -0.204260 | -0.370207 | 3.615965  |   |           |           |           |
| O  | 3.866843  | -0.134275 | 0.033204  |   |           |           |           |
| C  | 4.751836  | 0.356202  | -0.796589 |   |           |           |           |
| C  | 6.150512  | 0.438844  | -0.194017 |   |           |           |           |
| O  | 4.532654  | 0.726027  | -1.954882 |   |           |           |           |
| O  | -0.315888 | -2.782389 | 2.530944  |   |           |           |           |
| H  | 2.454557  | 0.210259  | -1.887074 |   |           |           |           |
| H  | 6.129100  | 1.050819  | 0.714589  |   |           |           |           |
| H  | 6.850551  | 0.867525  | -0.913802 |   |           |           |           |
| H  | 6.486050  | -0.562572 | 0.098092  |   |           |           |           |
| H  | -0.046884 | 0.675575  | 3.343055  |   |           |           |           |
| H  | 0.555747  | -0.689891 | 4.333219  |   |           |           |           |
| H  | -1.203677 | -0.532290 | 4.026001  |   |           |           |           |
| H  | -0.109869 | -2.032638 | -1.107213 |   |           |           |           |
| H  | 0.443173  | -1.179900 | -2.648918 |   |           |           |           |
| H  | -0.096532 | 1.019332  | -1.652243 |   |           |           |           |
| H  | -0.501909 | 1.101165  | 0.836089  |   |           |           |           |
| H  | -2.821878 | 1.356214  | 0.711870  |   |           |           |           |
| H  | -2.543346 | 1.214011  | -1.030305 |   |           |           |           |

36

|    |   |           |           |           |
|----|---|-----------|-----------|-----------|
|    | H | -2.031499 | -2.531556 | 0.950741  |
|    | H | 0.129217  | -1.059659 | 0.088656  |
| C  |   | -0.747594 | -0.775633 | 0.675408  |
| N  |   | -1.168542 | 0.604549  | 0.330203  |
| C  |   | -2.644397 | 0.723299  | 0.159021  |
| C  |   | -3.150241 | -0.644283 | 0.689660  |
| C  |   | -1.998949 | -1.607831 | 0.364191  |
| S  |   | -0.277701 | 1.882136  | 0.922303  |
| O  |   | 1.135216  | 1.504860  | 0.797250  |
| C  |   | -3.072241 | 0.976030  | -1.282184 |
| Pd |   | -2.207314 | 2.687610  | -2.178211 |
| O  |   | -1.562862 | 4.615911  | -3.093458 |
| C  |   | -2.066421 | 4.869151  | -4.191109 |
| O  |   | -2.934103 | 4.050438  | -4.777204 |
| C  |   | -2.355818 | 0.583951  | -2.423016 |
| O  |   | -0.806664 | 3.109591  | 0.312816  |
| C  |   | -0.631955 | 2.000183  | 2.699392  |
| C  |   | -1.751563 | 6.107865  | -4.980147 |
| H  |   | -1.083816 | 6.752258  | -4.407274 |
| H  |   | -2.675769 | 6.641679  | -5.224798 |
| H  |   | -1.274992 | 5.827622  | -5.926211 |
| H  |   | -1.697051 | 2.196336  | 2.841691  |
| H  |   | -0.042029 | 2.837748  | 3.079670  |
| H  |   | -0.328543 | 1.074536  | 3.193344  |
| H  |   | -2.879809 | 0.352464  | -3.348285 |
| H  |   | -1.354836 | 0.164462  | -2.334551 |
| H  |   | -4.157480 | 1.075895  | -1.368153 |
| H  |   | -3.029937 | 1.540824  | 0.779994  |
| H  |   | -3.301514 | -0.588742 | 1.776159  |
| H  |   | -4.100649 | -0.936122 | 0.232518  |
| H  |   | -2.019457 | -1.879181 | -0.696803 |

33<sup>TS</sup>

|    |   |           |           |           |
|----|---|-----------|-----------|-----------|
|    | H | 0.305863  | -3.727082 | 1.755866  |
|    | H | -3.225865 | 2.171508  | -0.327375 |
|    | H | -1.751065 | 2.491506  | 0.739424  |
|    | H | -3.186163 | -0.177531 | -0.423211 |
| N  |   | 0.772699  | 2.705101  | -0.191220 |
| C  |   | 0.173359  | 1.924641  | -1.309826 |
| C  |   | -1.331071 | 1.696787  | -1.221423 |
| C  |   | -2.158370 | 2.056765  | -0.167419 |
| H  |   | -1.783631 | 1.481129  | -2.189959 |
| H  |   | 0.667991  | 0.947217  | -1.399747 |
| C  |   | 0.523308  | 2.774646  | -2.560533 |
| H  |   | 0.601177  | 2.148827  | -3.454938 |
| H  |   | -0.267025 | 3.515667  | -2.735225 |
| C  |   | 1.830444  | 3.478892  | -2.180469 |
| C  |   | 1.603836  | 3.828680  | -0.706044 |
| H  |   | 2.680419  | 2.792421  | -2.285164 |
| H  |   | 2.032989  | 4.362646  | -2.794120 |
| H  |   | 1.041535  | 4.764168  | -0.597533 |
| H  |   | 2.522646  | 3.931693  | -0.124697 |
| S  |   | 1.245086  | 1.955064  | 1.238627  |
| O  |   | 0.096738  | 1.151713  | 1.687176  |
| O  |   | 1.792282  | 3.015865  | 2.092509  |
| C  |   | 2.586491  | 0.804270  | 0.857801  |
| H  |   | 2.182424  | -0.029526 | 0.279298  |
| H  |   | 3.379138  | 1.343383  | 0.332991  |
| H  |   | 2.954838  | 0.444583  | 1.822367  |
| Pd |   | -1.713550 | -0.093114 | -0.060805 |
| O  |   | 0.414541  | -1.375788 | -0.111344 |
| C  |   | -0.334686 | -2.301328 | 0.297522  |
| O  |   | -1.603262 | -2.119684 | 0.441705  |
| C  |   | 0.215803  | -3.661476 | 0.664555  |
| H  |   | -0.467315 | -4.452398 | 0.341332  |
| H  |   | 1.203734  | -3.806647 | 0.220858  |

35<sup>TS</sup>

|    |   |           |           |           |
|----|---|-----------|-----------|-----------|
|    | H | -2.821242 | -1.389103 | -1.061344 |
|    | H | -4.156922 | -1.205077 | 0.089196  |
|    | H | -2.004844 | -2.763259 | 0.772511  |
|    | H | -2.718622 | -1.678250 | 1.984791  |
| N  |   | -0.986387 | -0.913030 | 0.978826  |
| C  |   | -1.172496 | 0.423135  | 0.351250  |
| C  |   | -2.703161 | 0.455692  | 0.089112  |
| C  |   | -3.088516 | -1.023992 | -0.063489 |
| C  |   | -2.230621 | -1.719294 | 0.998960  |
| C  |   | -0.365128 | 0.602640  | -0.927828 |
| C  |   | 0.214261  | -0.429769 | -1.659555 |
| Pd |   | 1.770007  | 0.594506  | -0.569865 |
| O  |   | 1.392813  | -0.449068 | 1.656246  |
| S  |   | 0.198104  | -1.187151 | 2.109030  |
| C  |   | -0.321392 | -0.403627 | 3.656611  |
| O  |   | 3.734783  | 1.288693  | -0.170496 |
| C  |   | 4.174734  | 1.997011  | -1.142682 |
| C  |   | 5.583572  | 2.541231  | -1.010593 |
| O  |   | 3.513488  | 2.245267  | -2.191528 |
| O  |   | 0.239626  | -2.632740 | 2.345542  |
| H  |   | 2.224894  | 1.453894  | -1.828430 |
| H  |   | 5.726738  | 2.971289  | -0.014733 |
| H  |   | 5.788732  | 3.287117  | -1.780605 |
| H  |   | 6.293791  | 1.712527  | -1.115077 |
| H  |   | -0.437311 | 0.670308  | 3.495200  |
| H  |   | 0.472195  | -0.590477 | 4.384290  |
| H  |   | -1.255108 | -0.861244 | 3.991245  |
| H  |   | 0.434915  | -0.302679 | -2.715749 |
| H  |   | 0.176827  | -1.454371 | -1.296201 |
| H  |   | -0.568238 | 1.552097  | -1.424404 |
| H  |   | -0.896764 | 1.220965  | 1.052615  |
| H  |   | -3.215160 | 0.892139  | 0.956084  |
| H  |   | -2.954612 | 1.060874  | -0.786865 |

|    |           |           |           |           |
|----|-----------|-----------|-----------|-----------|
|    | O         | 1.702953  | -1.051864 | -2.862790 |
|    | O         | -0.520398 | -2.089401 | -2.197664 |
|    | H         | -0.163253 | 2.203680  | 1.922795  |
|    | H         | -0.270491 | 2.258967  | -2.206393 |
|    | H         | 0.888455  | 4.487432  | 2.012909  |
|    | H         | 0.796697  | 4.520193  | -2.308355 |
|    | H         | 1.388266  | 5.669324  | -0.149226 |
|    | H         | 0.064650  | -0.526497 | 4.755340  |
|    | H         | 0.540120  | -2.247165 | 4.543009  |
|    | H         | 1.738112  | -0.963373 | 4.352440  |
|    | H         | -5.014784 | 3.718553  | -0.173900 |
|    | H         | -4.586349 | 2.985327  | -1.756852 |
|    | H         | -5.568667 | 2.083051  | -0.594788 |
|    | H         | 0.723241  | -1.492697 | 0.410393  |
|    | C         | 1.665507  | -3.353454 | -1.475888 |
|    | H         | 2.217897  | 0.648828  | -1.024189 |
|    | H         | 1.834530  | 0.554925  | 0.702123  |
|    | H         | 3.225294  | -1.567343 | 0.845768  |
|    | H         | 3.758537  | -1.281719 | -0.822351 |
|    | H         | 4.676675  | 0.949452  | -0.164468 |
|    | H         | 4.145097  | 0.680231  | 1.491607  |
|    | H         | 5.702118  | -1.290817 | 1.714878  |
|    | H         | 7.805048  | -1.027445 | 0.721447  |
|    | H         | 8.173322  | 1.221447  | -0.440518 |
|    | H         | 7.794741  | -0.029573 | -1.621336 |
|    | H         | 6.547581  | 1.131620  | -1.139104 |
|    | H         | -2.956570 | -1.119280 | -1.955936 |
|    | H         | -2.069375 | -1.492397 | 2.055250  |
|    | H         | -4.601263 | -2.997575 | -1.870220 |
|    | H         | -3.672305 | -3.399840 | 2.331505  |
|    | H         | -4.972588 | -4.177489 | 0.321364  |
| C  | -4.265142 | -3.356238 | 0.243913  |           |
| C  | -4.063775 | -2.704881 | -0.974029 |           |
| C  | -3.148571 | -1.658657 | -1.038266 |           |
| N  | -2.449568 | -1.263550 | 0.042277  |           |
| C  | -2.646582 | -1.876586 | 1.224468  |           |
| C  | -3.545750 | -2.931138 | 1.361000  |           |
| Pd | -1.227497 | 0.381832  | -0.082378 |           |
| N  | 0.882878  | -0.863789 | -0.429373 |           |
| C  | 2.096513  | -0.034422 | -0.180006 |           |
| C  | 3.404036  | -0.790566 | 0.091299  |           |
| C  | 4.507697  | 0.168544  | 0.586459  |           |
| C  | 5.789069  | -0.552903 | 0.914987  |           |
| C  | 6.993875  | -0.403267 | 0.343051  |           |
| C  | 7.384240  | 0.531221  | -0.770316 |           |
| N  | -0.231100 | 2.164945  | -0.139977 |           |
| C  | 0.072371  | 2.767200  | 1.026359  |           |
| C  | 0.660991  | 4.029595  | 1.055666  |           |
| C  | 0.933229  | 4.682547  | -0.146910 |           |
| C  | 0.606402  | 4.050465  | -1.348649 |           |
| C  | 0.016963  | 2.790370  | -1.305768 |           |
| O  | -0.158428 | -0.066226 | 2.258184  |           |
| C  | 0.383450  | -1.131947 | 2.688904  |           |
| C  | 0.684681  | -1.223167 | 4.184618  |           |
| O  | -2.870376 | 1.353394  | -0.838878 |           |
| C  | -3.493224 | 2.195367  | -0.045263 |           |
| C  | -4.740163 | 2.795742  | -0.690451 |           |
| O  | 0.707252  | -2.121434 | 1.962203  |           |
| O  | -3.154103 | 2.481414  | 1.101573  |           |
| S  | 0.878970  | -1.773307 | -1.881044 |           |

H 1.542103 -3.987456 -2.357752  
H 2.721243 -3.194575 -1.257155  
H 1.147711 -3.782410 -0.614780

50<sup>TS</sup>

C -4.050183 -3.592188 0.140600  
C -4.292993 -2.573649 -0.779368  
C -3.460549 -1.460261 -0.793163  
N -2.422376 -1.336611 0.055704  
C -2.171433 -2.322334 0.938156  
C -2.969740 -3.460660 1.009927  
Pd -1.249989 0.363626 -0.056573  
N 0.876023 -0.876488 -0.369294  
C 2.077768 -0.012068 -0.208160  
C 3.393943 -0.733791 0.107104  
C 4.503479 0.264139 0.498282  
C 5.787899 -0.427840 0.871802  
C 6.979255 -0.338936 0.267237  
C 7.350552 0.486325 -0.933751  
N -0.277867 2.159110 -0.202261  
C 0.040480 2.831088 0.919829  
C 0.602955 4.103399 0.861850  
C 0.830372 4.692963 -0.380609  
C 0.487360 3.988846 -1.535626  
C -0.073048 2.722592 -1.406860  
O -0.122149 0.151548 2.223640  
C 0.409717 -0.865305 2.759169  
C 0.643064 -0.819882 4.268444  
O -2.904400 1.338947 -0.781432  
C -3.469284 2.219501 0.019101  
C -4.717642 2.843482 -0.602550  
O 0.735221 -1.926252 2.138246  
O -3.075026 2.527969 1.137311  
S 0.842755 -1.869300 -1.764441



|   |           |           |           |   |          |           |           |
|---|-----------|-----------|-----------|---|----------|-----------|-----------|
| O | 1.619886  | -1.189550 | -2.807394 | H | 1.555624 | -4.094107 | -2.124625 |
| O | -0.552805 | -2.243222 | -2.010703 | H | 2.738645 | -3.209532 | -1.104456 |
| H | -0.155457 | 2.307014  | 1.848109  | H | 1.197943 | -3.794737 | -0.391446 |
| H | -0.372056 | 2.134072  | -2.266839 |   |          |           |           |
| H | 0.846034  | 4.618634  | 1.785058  |   |          |           |           |
| H | 0.643991  | 4.407258  | -2.524216 |   |          |           |           |
| H | 1.264692  | 5.686284  | -0.449657 |   |          |           |           |
| H | -0.321186 | -0.910798 | 4.782995  |   |          |           |           |
| H | 1.295633  | -1.634564 | 4.590757  |   |          |           |           |
| H | 1.071469  | 0.144825  | 4.558146  |   |          |           |           |
| H | -5.107175 | 3.623534  | 0.054235  |   |          |           |           |
| H | -4.487091 | 3.264075  | -1.586803 |   |          |           |           |
| H | -5.484495 | 2.074378  | -0.748258 |   |          |           |           |
| H | 0.749172  | -1.439527 | 0.518906  |   |          |           |           |
| C | 1.682180  | -3.402410 | -1.288267 |   |          |           |           |
| H | 2.177635  | 0.600648  | -1.106972 |   |          |           |           |
| H | 1.820869  | 0.642493  | 0.627502  |   |          |           |           |
| H | 3.225765  | -1.439863 | 0.930336  |   |          |           |           |
| H | 3.735402  | -1.305139 | -0.763886 |   |          |           |           |
| H | 4.662573  | 0.973325  | -0.322498 |   |          |           |           |
| H | 4.152586  | 0.856558  | 1.357568  |   |          |           |           |
| H | 5.710522  | -1.088247 | 1.737128  |   |          |           |           |
| H | 7.796227  | -0.928474 | 0.685460  |   |          |           |           |
| H | 8.147762  | 1.200377  | -0.685335 |   |          |           |           |
| H | 7.742814  | -0.151142 | -1.737723 |   |          |           |           |
| H | 6.508329  | 1.053515  | -1.339449 |   |          |           |           |
| H | -3.614571 | -0.630297 | -1.470655 |   |          |           |           |
| H | -1.294014 | -2.204367 | 1.564497  |   |          |           |           |
| H | -5.115216 | -2.631049 | -1.484973 |   |          |           |           |
| H | -2.731419 | -4.227011 | 1.740126  |   |          |           |           |
| H | -4.686779 | -4.471826 | 0.175127  |   |          |           |           |

51

|    |           |           |           |           |           |           |           |
|----|-----------|-----------|-----------|-----------|-----------|-----------|-----------|
|    |           |           | H         | -2.195151 | -3.634598 | -2.830732 |           |
|    |           |           | H         | -5.000825 | -2.066617 | 0.058846  |           |
| C  | 2.349687  | 4.228304  | 0.788918  | H         | -4.455667 | -3.752006 | -1.726926 |
| C  | 1.848562  | 3.456740  | 1.836694  | H         | 0.660422  | 1.722886  | 2.342311  |
| C  | 1.045210  | 2.354547  | 1.549453  | H         | 0.880453  | 2.470417  | -1.726402 |
| N  | 0.727715  | 2.015389  | 0.282302  | H         | 2.069382  | 3.690608  | 2.873209  |
| C  | 1.202243  | 2.765636  | -0.734674 | H         | 2.382322  | 4.439230  | -1.371188 |
| C  | 2.020942  | 3.870654  | -0.519965 | H         | 2.980906  | 5.090551  | 0.986409  |
| Pd | -0.548490 | 0.433939  | -0.171431 | H         | -2.419858 | 2.360095  | -3.908541 |
| N  | 0.281496  | -0.843657 | 1.247228  | H         | -3.819964 | 3.068737  | -3.039685 |
| C  | 1.737176  | -1.065028 | 1.199929  | H         | -2.207522 | 3.817264  | -2.932069 |
| C  | 2.144445  | -1.789910 | -0.087927 | C         | -0.423359 | -2.528610 | 3.302586  |
| C  | 3.667793  | -2.008506 | -0.187962 | H         | 2.293223  | -0.118364 | 1.283384  |
| C  | 4.055758  | -2.813211 | -1.401548 | H         | 2.053834  | -1.670895 | 2.060543  |
| C  | 4.795935  | -2.425673 | -2.451927 | H         | 1.622730  | -2.755923 | -0.132788 |
| C  | 5.444940  | -1.087894 | -2.686000 | H         | 1.806253  | -1.209336 | -0.956918 |
| N  | -1.886214 | -1.055024 | -0.690712 | H         | 4.176549  | -1.037471 | -0.180208 |
| C  | -1.583850 | -1.948683 | -1.650518 | H         | 4.008120  | -2.541057 | 0.714239  |
| C  | -2.480128 | -2.934763 | -2.051497 | H         | 3.666630  | -3.833502 | -1.414057 |
| C  | -3.732722 | -2.994647 | -1.435662 | H         | 4.962019  | -3.159068 | -3.242817 |
| C  | -4.039254 | -2.063878 | -0.444179 | H         | 6.534811  | -1.194279 | -2.778638 |
| C  | -3.092620 | -1.101271 | -0.094552 | H         | 5.092823  | -0.645158 | -3.628072 |
| O  | -1.203498 | 1.555267  | -1.761513 | H         | 5.246363  | -0.370419 | -1.884418 |
| C  | -2.431103 | 2.018610  | -1.763017 | H         | -0.837757 | -2.525872 | 4.313828  |
| C  | -2.747903 | 2.864439  | -2.993443 | H         | -1.063109 | -3.092358 | 2.621325  |
| O  | -3.266212 | 1.824539  | -0.879125 | H         | 0.589455  | -2.937387 | 3.316194  |
| S  | -0.382894 | -0.802966 | 2.747804  |           |           |           |           |
| O  | -1.789706 | -0.373052 | 2.609483  |           |           |           |           |
| O  | 0.466707  | -0.083576 | 3.733495  |           |           |           |           |
| H  | -0.600992 | -1.857948 | -2.099235 |           |           |           |           |
| H  | -3.278436 | -0.354795 | 0.664672  |           |           |           |           |

|                       |           |           |           |   |           |           |           |
|-----------------------|-----------|-----------|-----------|---|-----------|-----------|-----------|
| [52/py] <sup>TS</sup> |           |           |           | H | 5.719371  | -1.943163 | -0.413094 |
|                       |           |           |           | H | 6.864231  | 0.197769  | 0.254354  |
| C                     | -0.252604 | -1.714006 | 2.680215  | H | -1.393741 | -3.321637 | -2.732803 |
| N                     | -0.690538 | -0.925235 | 1.688766  | H | 0.232652  | -4.019317 | -2.424700 |
| C                     | -2.001314 | -0.636618 | 1.639244  | H | -1.019634 | -4.080481 | -1.170900 |
| C                     | -2.915707 | -1.124873 | 2.577696  | H | 0.400201  | 4.438369  | -0.247281 |
| C                     | -2.452670 | -1.944788 | 3.607873  | H | -1.204197 | 4.360408  | 0.532254  |
| C                     | -1.090001 | -2.247286 | 3.662502  | H | 0.286459  | 4.057742  | 1.475653  |
| Pd                    | 0.941787  | -0.125831 | -0.299181 |   |           |           |           |
| O                     | -0.888890 | -1.134078 | -1.422010 |   |           |           |           |
| C                     | -0.158039 | -2.146992 | -1.434244 |   |           |           |           |
| C                     | -0.608922 | -3.473887 | -1.987654 |   |           |           |           |
| N                     | 3.013229  | 0.034174  | -0.110948 |   |           |           |           |
| C                     | 3.612833  | 1.185362  | 0.247702  |   |           |           |           |
| C                     | 4.995925  | 1.278890  | 0.387622  |   |           |           |           |
| C                     | 5.783457  | 0.151266  | 0.152520  |   |           |           |           |
| C                     | 5.152874  | -1.038058 | -0.217393 |   |           |           |           |
| C                     | 3.766089  | -1.060759 | -0.341146 |   |           |           |           |
| O                     | 0.860086  | 1.827061  | 0.199102  |   |           |           |           |
| C                     | -0.304460 | 2.438588  | 0.164092  |   |           |           |           |
| O                     | -1.370816 | 1.897978  | -0.116903 |   |           |           |           |
| O                     | 1.036783  | -2.069261 | -0.920969 |   |           |           |           |
| C                     | -0.204989 | 3.920059  | 0.505908  |   |           |           |           |
| H                     | -2.305109 | 0.012892  | 0.824114  |   |           |           |           |
| H                     | 0.814555  | -1.928915 | 2.683940  |   |           |           |           |
| H                     | -3.966573 | -0.862020 | 2.495453  |   |           |           |           |
| H                     | -0.681465 | -2.881130 | 4.444784  |   |           |           |           |
| H                     | -3.138020 | -2.340428 | 4.353589  |   |           |           |           |
| H                     | 2.943666  | 2.022211  | 0.415459  |   |           |           |           |
| H                     | 3.224766  | -1.954505 | -0.631767 |   |           |           |           |
| H                     | 5.437578  | 2.227446  | 0.676977  |   |           |           |           |

$\kappa^1$ -53

|    |           |           |           |
|----|-----------|-----------|-----------|
| Pd | 0.113626  | -0.040401 | 0.000040  |
| N  | -1.935205 | -0.040200 | 0.000088  |
| C  | -2.603682 | -0.391907 | -1.117466 |
| C  | -3.996312 | -0.406572 | -1.144220 |
| C  | -4.705857 | -0.039827 | 0.000113  |
| C  | -3.996191 | 0.326737  | 1.144429  |
| C  | -2.603563 | 0.311700  | 1.117649  |
| H  | -1.992394 | 0.559075  | 1.980703  |
| H  | -4.502751 | 0.620553  | 2.058165  |
| H  | -5.792434 | -0.039669 | 0.000119  |
| H  | -4.502968 | -0.700214 | -2.057960 |
| H  | -1.992610 | -0.639335 | -1.980564 |
| O  | 0.333212  | 1.290689  | -1.475273 |
| C  | 0.186709  | 0.928904  | -2.731382 |
| O  | -0.243353 | -0.169594 | -3.092275 |
| C  | 0.578571  | 2.015701  | -3.717574 |
| H  | 1.548038  | 2.448444  | -3.450948 |
| H  | -0.160878 | 2.824663  | -3.681712 |
| H  | 0.613625  | 1.603917  | -4.728462 |
| O  | 0.333308  | -1.371266 | 1.475562  |
| C  | 0.187447  | -1.009045 | 2.731607  |
| O  | -0.242262 | 0.089640  | 3.092359  |
| C  | 0.579736  | -2.095543 | 3.717960  |
| H  | -0.159800 | -2.904451 | 3.682744  |
| H  | 0.615345  | -1.683415 | 4.728689  |
| H  | 1.549033  | -2.528462 | 3.450992  |

 $\kappa^2$ -53

|    |           |           |           |
|----|-----------|-----------|-----------|
| Pd | 0.383540  | 0.268800  | -0.030976 |
| N  | -1.526054 | -0.441639 | 0.174205  |
| C  | -1.890940 | -1.677226 | -0.218743 |
| C  | -2.444400 | 0.382473  | 0.718617  |
| C  | -3.199194 | -2.132445 | -0.074356 |
| H  | -1.098738 | -2.282000 | -0.645228 |
| C  | -3.767663 | -0.009671 | 0.896971  |
| H  | -2.090208 | 1.367962  | 1.002920  |
| C  | -4.154676 | -1.289575 | 0.494710  |
| H  | -3.453489 | -3.134588 | -0.404581 |
| H  | -4.474168 | 0.682883  | 1.343073  |
| H  | -5.181092 | -1.622239 | 0.621573  |
| O  | 0.122153  | 2.320986  | 0.282547  |
| C  | 1.383161  | 2.509818  | 0.108909  |
| O  | 2.096467  | 1.491639  | -0.168540 |
| C  | 1.987614  | 3.873867  | 0.259451  |
| H  | 2.287492  | 4.015969  | 1.305084  |
| H  | 2.878899  | 3.963192  | -0.366853 |
| H  | 1.256859  | 4.645356  | 0.003021  |
| O  | 1.036980  | -1.584652 | -0.466720 |
| C  | 1.698858  | -2.186770 | 0.504953  |
| O  | 1.793932  | -1.766235 | 1.654349  |
| C  | 2.370378  | -3.475944 | 0.049080  |
| H  | 2.586907  | -4.105778 | 0.915207  |
| H  | 1.752931  | -4.018175 | -0.673616 |
| H  | 3.315827  | -3.224577 | -0.447004 |

54

C -3.351958 0.545221 -1.274109  
N -3.167423 -0.335244 -0.270924  
C -4.165222 -0.578392 0.601899  
C -5.400906 0.051386 0.489872  
C -5.605034 0.963814 -0.547926  
C -4.561968 1.214889 -1.439388  
Pd -1.378257 -1.311540 -0.158003  
O 0.441514 -2.272104 -0.569961  
C 0.265100 -2.049401 -1.816050  
C 1.296536 -2.420691 -2.836398  
O -1.613373 -1.453529 1.847348  
C -0.860001 -0.706120 2.605118  
C -0.994404 -1.010037 4.090025  
O -0.826415 -1.466861 -2.158453  
O -0.076368 0.165108 2.202231  
N 1.297834 1.424197 -0.036407  
C 2.686784 1.581659 0.430730  
C 3.432746 0.249065 0.309286  
C 4.875490 0.342656 0.843492  
C 5.594605 -0.980264 0.786380  
C 6.721604 -1.284029 0.124039  
C 7.570625 -0.379929 -0.729010  
S 0.439389 2.783354 -0.472983  
C 0.134648 3.734612 1.039055  
O -0.873878 2.314549 -0.946727  
O 1.295815 3.602360 -1.342627  
H 0.729025 0.839116 0.592099

H -0.310137 -1.829582 4.342294  
H -2.008083 -1.332346 4.343542  
H -0.712466 -0.133300 4.678172  
H -0.459922 4.607315 0.757315  
H 1.092666 4.050145 1.458813  
H -0.410035 3.099397 1.741262  
H 2.717388 1.928368 1.476496  
H 3.165546 2.341333 -0.194217  
H 2.883465 -0.527127 0.858091  
H 3.444290 -0.058280 -0.743598  
H 4.840443 0.682176 1.890972  
H 5.423525 1.113177 0.288249  
H 5.117321 -1.780602 1.355299  
H 7.085338 -2.309742 0.205351  
H 7.165704 0.632599 -0.815168  
H 7.673489 -0.787596 -1.744225  
H 8.587540 -0.299911 -0.319752  
H 0.814476 -2.718069 -3.771762  
H 1.934460 -3.223177 -2.458212  
H 1.921452 -1.542418 -3.039461  
H -2.504202 0.716752 -1.926459  
H -4.667165 1.924638 -2.253251  
H -6.559161 1.472242 -0.656220  
H -6.182231 -0.173806 1.208816  
H -3.936236 -1.279649 1.396136

|           |           |           |           |   |           |           |           |
|-----------|-----------|-----------|-----------|---|-----------|-----------|-----------|
| <b>8M</b> |           |           |           | H | 3.471492  | 4.104433  | -0.266351 |
|           |           |           |           | H | 5.687971  | 3.004899  | 0.190580  |
| N         | 2.440361  | 0.915089  | -0.003929 | H | 0.968025  | -2.748153 | 4.404844  |
| C         | 2.397463  | 2.249966  | -0.188865 | H | 2.292180  | -3.188507 | 3.307110  |
| C         | 3.548872  | 3.031889  | -0.119212 | H | 2.247331  | -1.555852 | 3.994198  |
| C         | 4.775140  | 2.417852  | 0.137431  | H | -2.340787 | -0.099700 | -1.207070 |
| C         | 4.808084  | 1.035178  | 0.327186  | H | -3.178821 | -1.320808 | -0.243096 |
| C         | 3.618118  | 0.316163  | 0.256690  | H | -2.502827 | -0.184393 | 1.866943  |
| Pd        | 0.728084  | -0.233911 | -0.108714 | H | -1.592597 | 1.021482  | 0.943262  |
| N         | -1.055333 | -1.386043 | -0.151867 | H | -3.633501 | 1.842255  | -0.145360 |
| S         | -0.942524 | -2.730286 | -1.293617 | H | -4.608913 | 0.588818  | 0.618632  |
| O         | 0.468604  | -3.114177 | -1.343962 | H | -4.334758 | 1.589998  | 2.855121  |
| O         | 1.395851  | -1.069119 | 1.654683  | H | -4.013882 | 3.905686  | 3.024228  |
| C         | 0.805447  | -1.928212 | 2.417930  | H | -4.050147 | 5.095665  | 0.711309  |
| O         | -0.333152 | -2.412566 | 2.233497  | H | -2.431230 | 4.969618  | 1.394075  |
| O         | 0.290272  | 0.503238  | -1.940676 | H | -2.917975 | 3.863401  | 0.107770  |
| C         | -0.332871 | 1.640036  | -2.095148 | H | 0.316106  | 2.065257  | -4.107120 |
| C         | -0.625274 | 1.957448  | -3.556031 | H | -1.175748 | 1.131580  | -4.019006 |
| C         | 1.626557  | -2.373284 | 3.617800  | H | -1.200992 | 2.882595  | -3.630919 |
| O         | -0.657491 | 2.407978  | -1.179580 | H | -1.772119 | -4.922644 | -1.059181 |
| C         | -2.334921 | -0.617695 | -0.247386 | H | -1.367124 | -4.202775 | 0.541940  |
| C         | -2.469583 | 0.365960  | 0.917139  | H | -2.889479 | -3.737327 | -0.311293 |
| C         | -3.732337 | 1.239361  | 0.763648  | H | -0.947238 | -1.821635 | 0.804853  |
| C         | -3.974170 | 2.114227  | 1.968011  |   |           |           |           |
| C         | -3.780503 | 3.438542  | 2.065703  |   |           |           |           |
| C         | -3.270911 | 4.377628  | 1.005529  |   |           |           |           |
| C         | -1.845243 | -4.034914 | -0.425736 |   |           |           |           |
| O         | -1.683003 | -2.359524 | -2.500937 |   |           |           |           |
| H         | 3.581725  | -0.754086 | 0.420971  |   |           |           |           |
| H         | 1.417564  | 2.671602  | -0.389598 |   |           |           |           |
| H         | 5.737217  | 0.512227  | 0.530152  |   |           |           |           |

|    |           |           |           |   |           |           |          |
|----|-----------|-----------|-----------|---|-----------|-----------|----------|
|    |           |           |           | H | -6.096846 | -3.053341 | 0.609269 |
|    |           |           |           | C | -5.799769 | -1.537582 | 2.174133 |
| Pd | 0.740267  | -0.367646 | 0.530086  | H | -5.344237 | -0.552379 | 2.307214 |
| N  | -0.819978 | 1.033470  | -1.042608 | H | -5.323379 | -2.223252 | 2.888269 |
| H  | -0.561881 | 0.302614  | -1.739010 | H | -6.856893 | -1.464091 | 2.465925 |
| O  | -0.129111 | -1.200271 | -2.550644 | O | 1.000348  | 1.147496  | 1.832700 |
| C  | 0.154821  | -2.154489 | -1.807718 | C | -0.183670 | 1.245089  | 2.367508 |
| O  | 0.479930  | -2.075605 | -0.550738 | O | -1.078856 | 0.436492  | 2.045901 |
| C  | 0.164945  | -3.576103 | -2.352211 | C | -0.406779 | 2.384946  | 3.326690 |
| H  | -0.167649 | -4.290937 | -1.594394 | H | 0.481463  | 2.554694  | 3.942549 |
| H  | 1.191223  | -3.839552 | -2.638294 | H | -1.275716 | 2.182176  | 3.957504 |
| H  | -0.465957 | -3.640434 | -3.241776 | H | -0.592322 | 3.295259  | 2.743514 |
| S  | 0.023189  | 2.463902  | -1.361937 | N | 2.768658  | -0.746714 | 0.530892 |
| O  | 1.451218  | 2.120141  | -1.408877 | C | 3.264876  | -1.995821 | 0.457453 |
| O  | -0.473661 | 3.485344  | -0.429893 | C | 4.636335  | -2.236463 | 0.460581 |
| C  | -0.447707 | 2.961587  | -3.038923 | C | 5.514562  | -1.153214 | 0.531646 |
| H  | 0.099399  | 3.882618  | -3.255330 | C | 4.987368  | 0.137126  | 0.599597 |
| H  | -1.523424 | 3.145590  | -3.075931 | C | 3.604880  | 0.306713  | 0.601660 |
| H  | -0.154619 | 2.168942  | -3.731046 | H | 3.138327  | 1.283527  | 0.654858 |
| C  | -2.282264 | 1.155393  | -0.821714 | H | 5.629555  | 1.010682  | 0.647924 |
| H  | -2.763695 | 1.675493  | -1.665045 | H | 6.589393  | -1.312193 | 0.532123 |
| H  | -2.431790 | 1.757667  | 0.076205  | H | 4.999206  | -3.258125 | 0.407587 |
| C  | -2.918862 | -0.225636 | -0.649157 | H | 2.531794  | -2.790890 | 0.382827 |
| H  | -2.770958 | -0.818103 | -1.561466 |   |           |           |          |
| H  | -2.419746 | -0.751669 | 0.170984  |   |           |           |          |
| C  | -4.426263 | -0.116188 | -0.340611 |   |           |           |          |
| H  | -4.909680 | 0.486535  | -1.126160 |   |           |           |          |
| H  | -4.562180 | 0.430634  | 0.599099  |   |           |           |          |
| C  | -5.095563 | -1.465408 | -0.286402 |   |           |           |          |
| H  | -5.090639 | -2.014431 | -1.230311 |   |           |           |          |
| C  | -5.668868 | -2.062250 | 0.769863  |   |           |           |          |

56<sup>TS</sup>

|    |           |           |           |           |           |           |           |
|----|-----------|-----------|-----------|-----------|-----------|-----------|-----------|
|    |           |           | H         | -5.006579 | -2.823315 | -0.571173 |           |
|    |           |           | H         | 0.627450  | 1.176716  | 4.217955  |           |
| Pd | 0.795703  | 0.004501  | 0.066893  | H         | -1.072835 | 0.744113  | 3.860147  |
| O  | -0.278605 | -1.747808 | -0.076190 | H         | 0.264893  | -0.247704 | 3.164222  |
| C  | -0.293524 | -2.514429 | 0.976706  | H         | -0.635086 | 2.370840  | -0.546202 |
| C  | -1.117610 | -3.786237 | 0.806584  | O         | -0.506174 | 3.046209  | -1.285826 |
| N  | -0.759343 | 1.144769  | 0.753608  | C         | 0.634607  | 2.816583  | -1.920471 |
| S  | 0.012015  | 1.864475  | 2.048027  | O         | 1.374746  | 1.865820  | -1.669313 |
| C  | -0.051273 | 0.752202  | 3.473521  | C         | 0.937925  | 3.846135  | -2.980402 |
| O  | 0.296401  | -2.283043 | 2.042481  | H         | 0.077533  | 3.967444  | -3.646574 |
| C  | -2.129608 | 0.641063  | 0.982622  | H         | 1.118790  | 4.814687  | -2.500143 |
| C  | -2.862618 | 0.433923  | -0.346096 | H         | 1.819957  | 3.551650  | -3.551061 |
| C  | -4.289265 | -0.111595 | -0.134859 | N         | 2.529887  | -0.983234 | -0.528182 |
| C  | -5.066999 | -0.198313 | -1.422703 | C         | 3.007608  | -1.993315 | 0.227748  |
| C  | -5.599300 | -1.287337 | -1.998279 | C         | 3.207306  | -0.602984 | -1.629242 |
| C  | -5.563530 | -2.708954 | -1.505554 | C         | 4.186775  | -2.659354 | -0.098155 |
| O  | -0.625700 | 3.127933  | 2.440968  | H         | 2.417832  | -2.252408 | 1.101197  |
| O  | 1.424512  | 1.890108  | 1.547383  | C         | 4.389295  | -1.229889 | -2.017502 |
| H  | -1.887751 | -3.819890 | 1.585143  | H         | 2.784241  | 0.228935  | -2.180714 |
| H  | -1.584318 | -3.844127 | -0.178929 | C         | 4.889934  | -2.275967 | -1.241053 |
| H  | -0.467573 | -4.655423 | 0.956738  | H         | 4.537887  | -3.463862 | 0.540308  |
| H  | -2.107893 | -0.301433 | 1.547532  | H         | 4.902173  | -0.893174 | -2.912927 |
| H  | -2.672971 | 1.381636  | 1.586619  | H         | 5.810841  | -2.780805 | -1.520056 |
| H  | -2.911206 | 1.390744  | -0.882740 |           |           |           |           |
| H  | -2.290858 | -0.262005 | -0.970001 |           |           |           |           |
| H  | -4.237557 | -1.088404 | 0.360053  |           |           |           |           |
| H  | -4.825315 | 0.558511  | 0.556406  |           |           |           |           |
| H  | -5.197565 | 0.754907  | -1.938842 |           |           |           |           |
| H  | -6.129697 | -1.143165 | -2.940989 |           |           |           |           |
| H  | -6.580952 | -3.089487 | -1.338443 |           |           |           |           |
| H  | -5.101605 | -3.367305 | -2.254233 |           |           |           |           |



|    |           |           |   |           |           |           |
|----|-----------|-----------|---|-----------|-----------|-----------|
|    |           |           | C | -4.421771 | 0.857783  | 0.295606  |
|    |           |           | H | -4.971626 | 1.652341  | 0.806676  |
| Pd | -0.245851 | -0.109769 | H | -4.445236 | 1.009412  | -0.786899 |
| O  | 1.628099  | -1.072618 | H | -4.918213 | -0.095457 | 0.516691  |
| S  | 1.029919  | -2.494371 | N | 0.403839  | 1.871032  | 0.510422  |
| N  | -0.540862 | -2.147987 | C | -0.240197 | 2.843853  | 1.187119  |
| C  | -1.327485 | -2.890884 | C | 0.242421  | 4.151656  | 1.221225  |
| C  | -1.896491 | -4.204757 | C | 1.417876  | 4.464397  | 0.538552  |
| C  | -2.793173 | -4.923142 | C | 2.082331  | 3.450115  | -0.154629 |
| C  | -3.288859 | -6.255174 | C | 1.546465  | 2.165798  | -0.142455 |
| C  | -4.557106 | -6.647996 | H | 2.031618  | 1.340276  | -0.652971 |
| C  | -5.819500 | -5.864146 | H | 3.002708  | 3.641637  | -0.697099 |
| H  | -6.453091 | -6.364938 | H | 1.811973  | 5.477015  | 0.547966  |
| H  | -6.414613 | -5.795257 | H | -0.304679 | 4.904115  | 1.780459  |
| H  | -5.631094 | -4.846089 | H | -1.145774 | 2.535801  | 1.701478  |
| H  | -4.712091 | -7.660836 |   |           |           |           |
| H  | -2.500899 | -6.974345 |   |           |           |           |
| H  | -2.210875 | -5.083596 |   |           |           |           |
| H  | -3.628824 | -4.268347 |   |           |           |           |
| H  | -2.469318 | -3.995141 |   |           |           |           |
| H  | -1.070348 | -4.871634 |   |           |           |           |
| H  | -0.738100 | -3.085031 |   |           |           |           |
| H  | -2.143234 | -2.215654 |   |           |           |           |
| O  | 1.659209  | -3.442351 |   |           |           |           |
| C  | 1.241928  | -3.141763 |   |           |           |           |
| H  | 0.787404  | -4.134273 |   |           |           |           |
| H  | 0.751211  | -2.460541 |   |           |           |           |
| H  | 2.315972  | -3.200952 |   |           |           |           |
| O  | -2.140111 | 0.342290  |   |           |           |           |
| C  | -2.992658 | 0.796738  |   |           |           |           |
| O  | -2.717921 | 1.139656  |   |           |           |           |

|    |           |           |           |   |           |           |           |
|----|-----------|-----------|-----------|---|-----------|-----------|-----------|
|    |           |           |           | H | 1.572055  | 3.280354  | -0.589332 |
|    |           |           |           | H | -0.559452 | 2.515874  | -1.179369 |
| Pd | 0.893457  | 0.293105  | 0.330870  | H | -2.187959 | 1.066353  | -2.410738 |
| N  | 2.649191  | 0.934514  | 1.243766  | H | -2.269655 | -1.247616 | -1.583393 |
| C  | 2.570440  | 1.942750  | 2.134719  | H | -1.642629 | -0.093430 | -3.618970 |
| C  | 3.679109  | 2.382044  | 2.853006  | H | -0.553194 | -1.482881 | -1.906660 |
| C  | 4.910460  | 1.757115  | 2.643250  | H | 0.758250  | 0.499276  | -3.104321 |
| C  | 4.984210  | 0.708697  | 1.724881  | H | -0.204574 | 1.807451  | -3.771282 |
| C  | 3.830659  | 0.320810  | 1.046257  | O | 1.639159  | -1.640360 | 0.309456  |
| N  | -0.934487 | -0.355291 | -0.241987 | C | 1.310655  | -2.358719 | 1.353475  |
| S  | -1.933156 | 0.535030  | 0.698272  | O | 0.695259  | -1.950980 | 2.341481  |
| O  | -1.061479 | 1.636459  | 1.244599  | C | 1.748091  | -3.817724 | 1.244506  |
| O  | -3.195710 | 0.910525  | 0.033854  | H | 2.634362  | -3.931271 | 0.614187  |
| C  | -2.340258 | -0.516064 | 2.104333  | H | 1.932368  | -4.224230 | 2.242386  |
| H  | -2.873552 | 0.103923  | 2.829734  | H | 0.932556  | -4.391840 | 0.787383  |
| H  | -1.406683 | -0.911523 | 2.512001  |   |           |           |           |
| H  | -2.981228 | -1.323810 | 1.743535  |   |           |           |           |
| C  | -1.298574 | -0.734242 | -1.610126 |   |           |           |           |
| C  | -1.370074 | 0.381886  | -2.665733 |   |           |           |           |
| C  | -0.070939 | 1.181237  | -2.874541 |   |           |           |           |
| C  | 0.282890  | 2.095313  | -1.726195 |   |           |           |           |
| C  | 1.514182  | 2.539849  | -1.387600 |   |           |           |           |
| C  | 2.813568  | 2.218868  | -2.075055 |   |           |           |           |
| H  | 3.621273  | 2.060851  | -1.350832 |   |           |           |           |
| H  | 3.121988  | 3.061064  | -2.711960 |   |           |           |           |
| H  | 2.745920  | 1.331526  | -2.711319 |   |           |           |           |
| H  | 3.818012  | -0.506368 | 0.344974  |   |           |           |           |
| H  | 5.917266  | 0.187352  | 1.535411  |   |           |           |           |
| H  | 5.793207  | 2.077550  | 3.189585  |   |           |           |           |
| H  | 3.569027  | 3.194422  | 3.564242  |   |           |           |           |
| H  | 1.587500  | 2.386347  | 2.265440  |   |           |           |           |

**cis-[6,5]-A**

|    |   |           |           |           |
|----|---|-----------|-----------|-----------|
|    | H | 4.582582  | 1.178250  | -0.119816 |
|    | C | 4.625714  | -0.717004 | 0.922894  |
|    | H | 5.124336  | -1.238434 | 0.095179  |
|    | H | 5.405077  | -0.397121 | 1.625808  |
| N  |   | 2.631276  | -2.010885 | 0.618929  |
| C  |   | 2.806298  | 0.210807  | -0.620515 |
| C  |   | 3.870106  | 0.502322  | 0.388795  |
| H  |   | 2.967207  | -0.632826 | -1.282649 |
| H  |   | 3.453691  | 1.090792  | 1.215539  |
| C  |   | 3.647288  | -1.680331 | 1.608305  |
| H  |   | 3.224166  | -1.211693 | 2.508476  |
| S  |   | 1.125019  | -2.158019 | 1.040671  |
| O  |   | 0.725270  | -1.594866 | 2.349722  |
| C  |   | 0.674632  | -3.911509 | 1.020307  |
| H  |   | 0.937010  | -4.324195 | 0.045104  |
| H  |   | -0.399165 | -3.985862 | 1.204307  |
| H  |   | 1.239834  | -4.401716 | 1.816639  |
| O  |   | 0.269600  | -1.683408 | -0.160312 |
| Pd |   | -0.181430 | 0.286250  | -0.421403 |
| C  |   | 1.785851  | 1.119717  | -0.945717 |
| H  |   | 1.479373  | 1.044630  | -1.997240 |
| C  |   | 1.805400  | 2.533800  | -0.378789 |
| H  |   | 1.765599  | 2.546982  | 0.715742  |
| H  |   | 2.723613  | 3.058472  | -0.683779 |
| H  |   | 0.951119  | 3.106806  | -0.743643 |
| O  |   | -1.200605 | 2.071388  | -0.696907 |
| C  |   | -2.331966 | 1.520425  | -0.416336 |
| O  |   | -2.332544 | 0.280752  | -0.144951 |
| C  |   | -3.587716 | 2.341131  | -0.386641 |
| H  |   | -4.456332 | 1.709457  | -0.588942 |
| H  |   | -3.527530 | 3.157452  | -1.111567 |
| H  |   | -3.703816 | 2.778243  | 0.612792  |
| H  |   | 4.192494  | -2.582877 | 1.926671  |

**cis-[6,5]-B**

|    |           |           |           |           |           |           |           |
|----|-----------|-----------|-----------|-----------|-----------|-----------|-----------|
|    | H         | 4.751177  | 1.101349  | -0.008400 |           |           |           |
|    | C         | 4.795313  | -0.998155 | 0.521328  |           |           |           |
| N  | 2.633929  | -2.006397 | 0.333978  | H         | 5.089180  | -1.333282 | -0.482311 |
| C  | 2.845809  | 0.359358  | -0.425945 | H         | 5.710625  | -0.901827 | 1.118853  |
| C  | 4.073745  | 0.347489  | 0.433358  | N         | -1.037670 | 2.351048  | -0.448849 |
| H  | 2.875329  | -0.236894 | -1.332467 | C         | -1.506865 | 3.047541  | 0.605426  |
| H  | 3.835190  | 0.713613  | 1.438710  | C         | -1.228158 | 2.832501  | -1.692646 |
| C  | 3.843713  | -2.026817 | 1.144724  | C         | -2.159710 | 4.267464  | 0.454469  |
| H  | 3.656909  | -1.765465 | 2.196965  | H         | -1.353042 | 2.599169  | 1.580747  |
| S  | 1.224907  | -2.092971 | 1.033213  | C         | -1.864857 | 4.050854  | -1.919685 |
| O  | 1.128798  | -1.576173 | 2.419569  | H         | -0.888945 | 2.203968  | -2.506237 |
| C  | 0.665459  | -3.815642 | 1.061004  | C         | -2.337873 | 4.783313  | -0.830998 |
| H  | 0.688037  | -4.201380 | 0.040665  | H         | -2.521706 | 4.792585  | 1.332566  |
| H  | -0.348899 | -3.831796 | 1.465521  | H         | -1.997807 | 4.399332  | -2.938740 |
| H  | 1.348064  | -4.374318 | 1.706447  | H         | -2.844748 | 5.732605  | -0.980632 |
| O  | 0.210308  | -1.514629 | 0.037249  |           |           |           |           |
| Pd | -0.256496 | 0.466968  | -0.162769 |           |           |           |           |
| C  | 1.847246  | 1.335468  | -0.317896 |           |           |           |           |
| H  | 1.479788  | 1.638701  | -1.305869 |           |           |           |           |
| C  | 1.995251  | 2.449838  | 0.712148  |           |           |           |           |
| H  | 1.909605  | 2.073852  | 1.738501  |           |           |           |           |
| H  | 2.970931  | 2.951690  | 0.627368  |           |           |           |           |
| H  | 1.229257  | 3.216256  | 0.577022  |           |           |           |           |
| O  | -2.200262 | -0.159890 | 0.060726  |           |           |           |           |
| C  | -2.904900 | -0.231456 | -1.036886 |           |           |           |           |
| O  | -2.535701 | 0.144674  | -2.155344 |           |           |           |           |
| C  | -4.276263 | -0.867500 | -0.827530 |           |           |           |           |
| H  | -4.176803 | -1.954119 | -0.940871 |           |           |           |           |
| H  | -4.974338 | -0.505779 | -1.587159 |           |           |           |           |
| H  | -4.662194 | -0.668700 | 0.176185  |           |           |           |           |
| H  | 4.312694  | -3.023351 | 1.123032  |           |           |           |           |

**cis-[6,5]-C**

|    |           |           |           |           |   |           |           |           |
|----|-----------|-----------|-----------|-----------|---|-----------|-----------|-----------|
|    | H         | 4.698009  | 1.251470  | -0.037365 |   |           |           |           |
|    | C         | 4.742051  | -0.774854 | 0.729179  |   |           |           |           |
| N  | 2.619033  | -1.815894 | 0.480085  |           | H | 5.108143  | -1.202994 | -0.213254 |
| C  | 2.818226  | 0.444524  | -0.442292 |           | H | 5.611790  | -0.603685 | 1.375569  |
| C  | 4.011452  | 0.543279  | 0.460703  |           | N | -2.257878 | -0.212238 | -0.093763 |
| H  | 2.919734  | -0.189281 | -1.317897 |           | C | -2.618941 | -0.792358 | 1.066461  |
| H  | 3.731029  | 1.016527  | 1.408239  |           | C | -3.165860 | -0.068722 | -1.077372 |
| C  | 3.760196  | -1.753869 | 1.382485  |           | C | -3.918694 | -1.240224 | 1.290733  |
| H  | 3.486193  | -1.398171 | 2.386960  |           | H | -1.840239 | -0.899008 | 1.814483  |
| S  | 1.176152  | -2.090231 | 1.030033  |           | C | -4.482168 | -0.503568 | -0.925820 |
| O  | 0.874934  | -1.689565 | 2.427905  |           | H | -2.808090 | 0.404466  | -1.986561 |
| C  | 0.817794  | -3.862912 | 0.898428  |           | C | -4.868450 | -1.094542 | 0.277515  |
| H  | 0.976434  | -4.169610 | -0.136549 |           | H | -4.170723 | -1.694657 | 2.243815  |
| H  | -0.217679 | -4.029153 | 1.203762  |           | H | -5.182893 | -0.374718 | -1.744805 |
| H  | 1.502883  | -4.387063 | 1.569685  |           | H | -5.889402 | -1.437102 | 0.423442  |
| O  | 0.190595  | -1.547728 | -0.015516 |           |   |           |           |           |
| Pd | -0.272276 | 0.449854  | -0.322322 |           |   |           |           |           |
| C  | 1.768012  | 1.372723  | -0.425354 |           |   |           |           |           |
| H  | 1.427558  | 1.613113  | -1.441512 |           |   |           |           |           |
| C  | 1.785285  | 2.526820  | 0.569532  |           |   |           |           |           |
| H  | 1.783416  | 2.171251  | 1.606791  |           |   |           |           |           |
| H  | 2.680014  | 3.154398  | 0.436869  |           |   |           |           |           |
| H  | 0.905362  | 3.157132  | 0.433995  |           |   |           |           |           |
| O  | -0.936345 | 2.344344  | -0.659297 |           |   |           |           |           |
| C  | -1.308831 | 2.664341  | -1.871988 |           |   |           |           |           |
| O  | -1.335935 | 1.891165  | -2.835600 |           |   |           |           |           |
| C  | -1.701970 | 4.130420  | -2.013210 |           |   |           |           |           |
| H  | -2.370995 | 4.254969  | -2.868322 |           |   |           |           |           |
| H  | -0.797632 | 4.724706  | -2.195455 |           |   |           |           |           |
| H  | -2.171426 | 4.507814  | -1.100266 |           |   |           |           |           |
| H  | 4.238599  | -2.740284 | 1.493948  |           |   |           |           |           |

**cis-[6,5]-D**

|    |   |           |           |           |
|----|---|-----------|-----------|-----------|
|    | H | 4.351542  | 1.183107  | -0.052368 |
|    | C | 4.299567  | -0.949700 | 0.304342  |
|    | H | 4.680448  | -1.215868 | -0.691100 |
|    | H | 5.158372  | -0.926745 | 0.985382  |
| N  |   | 1.996761  | -1.701437 | 0.098035  |
| C  |   | 2.571232  | 0.477975  | -0.836508 |
| C  |   | 3.610932  | 0.413735  | 0.235960  |
| H  |   | 2.873083  | 0.024139  | -1.779889 |
| H  |   | 3.207453  | 0.710358  | 1.209302  |
| C  |   | 3.265128  | -1.994493 | 0.772727  |
| H  |   | 3.182051  | -1.937963 | 1.866408  |
| S  |   | 0.723897  | -1.568147 | 1.053035  |
| O  |   | 0.960698  | -1.038007 | 2.415394  |
| C  |   | -0.045637 | -3.195221 | 1.263315  |
| H  |   | -0.269792 | -3.597897 | 0.274222  |
| H  |   | -0.957567 | -3.058569 | 1.848848  |
| H  |   | 0.659303  | -3.836172 | 1.798623  |
| O  |   | -0.345214 | -0.805085 | 0.261427  |
| Pd |   | 0.021684  | -0.032612 | -1.612474 |
| C  |   | 1.483064  | 1.379018  | -0.911524 |
| H  |   | 1.422158  | 1.880721  | -1.883180 |
| C  |   | 1.068605  | 2.226713  | 0.275188  |
| H  |   | 0.948054  | 1.630000  | 1.184012  |
| H  |   | 1.814968  | 3.010295  | 0.476886  |
| H  |   | 0.115687  | 2.726171  | 0.075474  |
| O  |   | 0.047854  | 0.524097  | -3.597319 |
| C  |   | -0.914389 | -0.281759 | -3.904622 |
| O  |   | -1.409257 | -1.001953 | -2.988400 |
| C  |   | -1.430329 | -0.319138 | -5.315043 |
| H  |   | -2.189451 | 0.463182  | -5.438352 |
| H  |   | -1.895333 | -1.286505 | -5.520464 |
| H  |   | -0.621800 | -0.122078 | -6.024374 |
| H  |   | 3.612461  | -3.003252 | 0.507293  |

**cis-[6,5]-F**

|    |           |           |           |          |           |           |           |
|----|-----------|-----------|-----------|----------|-----------|-----------|-----------|
|    |           |           | H         | 3.493732 | -2.965347 | 0.687842  |           |
|    |           |           | H         | 4.489294 | 1.149629  | 0.010458  |           |
| C  | -0.108170 | -3.079043 | 1.193313  | H        | 4.714620  | -1.281270 | -0.524986 |
| S  | 0.668270  | -1.443540 | 1.068123  | H        | 5.154758  | -0.976161 | 1.159534  |
| O  | -0.360106 | -0.652791 | 0.256584  | O        | -0.530412 | 3.042590  | -2.880548 |
| Pd | -0.020888 | 0.260281  | -1.593753 | C        | -2.768954 | -1.064654 | -1.488193 |
| O  | 0.255064  | 1.004546  | -3.468007 | C        | -3.927014 | -1.700049 | -1.932422 |
| C  | -0.112045 | 2.243791  | -3.716796 | C        | -4.035728 | -2.042316 | -3.281376 |
| C  | 0.010996  | 2.616539  | -5.191576 | C        | -2.980408 | -1.729315 | -4.139588 |
| N  | 1.983495  | -1.567705 | 0.178223  | C        | -1.858759 | -1.082702 | -3.623456 |
| C  | 3.206359  | -1.926915 | 0.908912  | H        | -2.624449 | -0.792423 | -0.448673 |
| C  | 4.319018  | -0.965483 | 0.450034  | H        | -4.723323 | -1.917258 | -1.227241 |
| C  | 3.710368  | 0.430827  | 0.322955  | H        | -4.925715 | -2.540408 | -3.656413 |
| C  | 2.670059  | 0.492823  | -0.752046 | H        | -3.018802 | -1.974358 | -5.196516 |
| C  | 1.643100  | 1.452262  | -0.872888 | H        | -1.019612 | -0.788374 | -4.244775 |
| C  | 1.271569  | 2.373662  | 0.273896  |          |           |           |           |
| O  | 0.834794  | -0.967568 | 2.460025  |          |           |           |           |
| N  | -1.755167 | -0.761376 | -2.320597 |          |           |           |           |
| H  | 2.944971  | -0.019035 | -1.673626 |          |           |           |           |
| H  | 3.316293  | 0.786216  | 1.280901  |          |           |           |           |
| H  | 3.085184  | -1.830506 | 1.996260  |          |           |           |           |
| H  | -0.287699 | -3.454819 | 0.184475  |          |           |           |           |
| H  | -1.042873 | -2.968062 | 1.748119  |          |           |           |           |
| H  | 0.575982  | -3.736225 | 1.736091  |          |           |           |           |
| H  | 1.658336  | 1.928769  | -1.856346 |          |           |           |           |
| H  | 1.020332  | 1.817556  | 1.183325  |          |           |           |           |
| H  | 2.097431  | 3.060616  | 0.516154  |          |           |           |           |
| H  | 0.408395  | 2.984121  | -0.005212 |          |           |           |           |
| H  | 0.095140  | 3.701353  | -5.292403 |          |           |           |           |
| H  | -0.895725 | 2.292858  | -5.718603 |          |           |           |           |
| H  | 0.866305  | 2.121693  | -5.661016 |          |           |           |           |

|                           |           |           |           |   |          |           |          |
|---------------------------|-----------|-----------|-----------|---|----------|-----------|----------|
| <b><i>cis</i>-[6,5]-G</b> |           |           |           | H | 4.299513 | 1.340213  | 0.204540 |
|                           |           |           |           | C | 3.991412 | -0.227850 | 1.673348 |
| N                         | 2.550013  | -1.891879 | 0.779915  | H | 4.856674 | -0.799484 | 1.315544 |
| C                         | 2.918613  | 0.011313  | -0.628618 | H | 4.308971 | 0.348394  | 2.550729 |
| C                         | 3.474486  | 0.705656  | 0.575337  |   |          |           |          |
| H                         | 3.502979  | -0.803162 | -1.040938 |   |          |           |          |
| H                         | 2.729545  | 1.394656  | 0.988403  |   |          |           |          |
| C                         | 2.864679  | -1.204931 | 2.027072  |   |          |           |          |
| H                         | 2.016791  | -0.643047 | 2.452531  |   |          |           |          |
| S                         | 1.063695  | -2.372018 | 0.500738  |   |          |           |          |
| O                         | 1.017174  | -3.223769 | -0.694737 |   |          |           |          |
| C                         | 0.425464  | -3.292255 | 1.924441  |   |          |           |          |
| H                         | 1.063382  | -4.167656 | 2.062885  |   |          |           |          |
| H                         | -0.595490 | -3.590790 | 1.677651  |   |          |           |          |
| H                         | 0.431914  | -2.653862 | 2.810106  |   |          |           |          |
| O                         | 0.067906  | -1.186218 | 0.460256  |   |          |           |          |
| Pd                        | -0.054977 | -0.200465 | -1.349206 |   |          |           |          |
| C                         | 1.944847  | 0.620569  | -1.470940 |   |          |           |          |
| H                         | 2.064510  | 0.300210  | -2.511210 |   |          |           |          |
| C                         | 1.670607  | 2.122108  | -1.321528 |   |          |           |          |
| H                         | 1.245646  | 2.387652  | -0.347764 |   |          |           |          |
| H                         | 2.596619  | 2.704377  | -1.448495 |   |          |           |          |
| H                         | 0.966561  | 2.449054  | -2.090890 |   |          |           |          |
| O                         | -0.667955 | 0.677238  | -3.119846 |   |          |           |          |
| C                         | -1.862295 | 0.202105  | -3.006916 |   |          |           |          |
| O                         | -2.138268 | -0.482144 | -1.976229 |   |          |           |          |
| C                         | -2.869456 | 0.440521  | -4.095319 |   |          |           |          |
| H                         | -2.788061 | -0.363434 | -4.837253 |   |          |           |          |
| H                         | -2.672510 | 1.391074  | -4.598465 |   |          |           |          |
| H                         | -3.881551 | 0.425442  | -3.682882 |   |          |           |          |
| H                         | 3.215933  | -1.918647 | 2.788136  |   |          |           |          |



**cis-[6,5]-H**

|    |           |           |           |           |   |           |           |           |
|----|-----------|-----------|-----------|-----------|---|-----------|-----------|-----------|
|    | H         | 4.307565  | 1.069543  | -0.297147 |   |           |           |           |
|    | C         | 4.202845  | -1.056666 | 0.085624  |   |           |           |           |
| N  | 1.899925  | -1.634118 | 0.207040  |           | H | 4.428019  | -1.345351 | -0.948978 |
| C  | 2.404356  | 0.459836  | -0.843847 |           | H | 5.147599  | -1.064452 | 0.641937  |
| C  | 3.570394  | 0.342590  | 0.089585  |           | N | -2.007032 | -1.167878 | -2.011747 |
| H  | 2.561953  | 0.041750  | -1.837508 |           | C | -2.255915 | -2.400198 | -1.525985 |
| H  | 3.314632  | 0.662449  | 1.106146  |           | C | -2.870800 | -0.621161 | -2.889417 |
| C  | 3.200483  | -2.055030 | 0.696926  |           | C | -3.381742 | -3.127690 | -1.910467 |
| H  | 3.274627  | -2.003557 | 1.797192  |           | H | -1.541442 | -2.802807 | -0.816775 |
| S  | 0.562595  | -2.007201 | 0.921937  |           | C | -4.021174 | -1.284935 | -3.308509 |
| O  | 0.046793  | -3.390559 | 0.758450  |           | H | -2.600982 | 0.360997  | -3.261287 |
| C  | 0.630481  | -1.738860 | 2.719572  |           | C | -4.283252 | -2.563439 | -2.812695 |
| H  | 1.285570  | -2.491360 | 3.164221  |           | H | -3.535577 | -4.120087 | -1.498512 |
| H  | -0.386781 | -1.864152 | 3.095737  |           | H | -4.690865 | -0.801347 | -4.013006 |
| H  | 0.994615  | -0.729779 | 2.922601  |           | H | -5.170703 | -3.107861 | -3.124370 |
| O  | -0.456301 | -0.939379 | 0.482074  |           |   |           |           |           |
| Pd | -0.313334 | -0.033574 | -1.387537 |           |   |           |           |           |
| C  | 1.309047  | 1.330532  | -0.744335 |           |   |           |           |           |
| H  | 1.113738  | 1.855096  | -1.682205 |           |   |           |           |           |
| C  | 1.011180  | 2.121097  | 0.514834  |           |   |           |           |           |
| H  | 0.943586  | 1.473542  | 1.395431  |           |   |           |           |           |
| H  | 1.787676  | 2.876350  | 0.710865  |           |   |           |           |           |
| H  | 0.057207  | 2.649912  | 0.422695  |           |   |           |           |           |
| O  | -0.429885 | 0.946321  | -3.167310 |           |   |           |           |           |
| C  | 0.521489  | 0.833552  | -4.066231 |           |   |           |           |           |
| O  | 1.600566  | 0.263998  | -3.898918 |           |   |           |           |           |
| C  | 0.158805  | 1.477494  | -5.400293 |           |   |           |           |           |
| H  | -0.440552 | 2.381746  | -5.259034 |           |   |           |           |           |
| H  | -0.437265 | 0.766997  | -5.987039 |           |   |           |           |           |
| H  | 1.068538  | 1.706431  | -5.960588 |           |   |           |           |           |
| H  | 3.453764  | -3.083477 | 0.399600  |           |   |           |           |           |

**cis-[6,5]-I**

|    |           |           |           |           |           |           |           |
|----|-----------|-----------|-----------|-----------|-----------|-----------|-----------|
|    |           |           | C         | -3.876053 | -1.996130 | -2.540237 |           |
|    |           |           | H         | -3.539273 | -2.670254 | -3.333302 |           |
| Pd | -0.141595 | -0.153052 | -1.579147 | H         | -4.038557 | -2.601145 | -1.640012 |
| O  | -0.311088 | -1.091934 | 0.246504  | H         | -4.818051 | -1.516103 | -2.817014 |
| S  | 0.709655  | -2.170137 | 0.653798  | N         | -0.105342 | 0.771227  | -3.420020 |
| N  | 2.078565  | -1.707101 | 0.021364  | C         | -1.104967 | 1.606224  | -3.774855 |
| C  | 3.346697  | -2.063988 | 0.632512  | C         | -1.145838 | 2.202250  | -5.034403 |
| C  | 4.313287  | -0.915636 | 0.277088  | C         | -0.137340 | 1.922519  | -5.956527 |
| C  | 3.547223  | 0.412869  | 0.334031  | C         | 0.885204  | 1.045766  | -5.587550 |
| H  | 2.849353  | 0.194931  | -1.714222 | C         | 0.866575  | 0.490492  | -4.311482 |
| C  | 1.354493  | 1.325571  | -0.736966 | H         | 1.631044  | -0.206017 | -3.983885 |
| C  | 2.501429  | 0.528970  | -0.736567 | H         | 1.684972  | 0.784985  | -6.273400 |
| C  | 0.842344  | 2.012033  | 0.513505  | H         | -0.150682 | 2.370873  | -6.946126 |
| H  | 0.733411  | 1.303544  | 1.340461  | H         | -1.969124 | 2.865712  | -5.279225 |
| H  | 1.517060  | 2.817947  | 0.840593  | H         | -1.887517 | 1.742415  | -3.035759 |
| H  | -0.142344 | 2.455763  | 0.336617  |           |           |           |           |
| H  | 1.214937  | 1.881055  | -1.666037 |           |           |           |           |
| H  | 4.249854  | 1.244718  | 0.144590  |           |           |           |           |
| H  | 3.121008  | 0.585028  | 1.328580  |           |           |           |           |
| H  | 5.173778  | -0.904723 | 0.956583  |           |           |           |           |
| H  | 3.741074  | -3.023041 | 0.263512  |           |           |           |           |
| H  | 3.287471  | -2.141094 | 1.731382  |           |           |           |           |
| H  | 4.705859  | -1.059923 | -0.738908 |           |           |           |           |
| C  | 0.686874  | -1.988675 | 2.466054  |           |           |           |           |
| H  | -0.353098 | -2.123164 | 2.770401  |           |           |           |           |
| H  | 1.041463  | -0.994701 | 2.746165  |           |           |           |           |
| H  | 1.305953  | -2.770638 | 2.910555  |           |           |           |           |
| O  | 0.284515  | -3.560777 | 0.402621  |           |           |           |           |
| O  | -1.603012 | -1.398624 | -2.292763 |           |           |           |           |
| C  | -2.822048 | -0.939797 | -2.230533 |           |           |           |           |
| O  | -3.137285 | 0.222800  | -1.940112 |           |           |           |           |

**cis-[6,5]-J**

|    |           |           |   |           |           |           |
|----|-----------|-----------|---|-----------|-----------|-----------|
|    |           |           | C | -3.370254 | -3.031323 | -0.900180 |
|    |           |           | H | -4.353917 | -2.862237 | -1.347434 |
|    |           |           | H | -2.748701 | -3.553827 | -1.637749 |
|    |           |           | H | -3.456238 | -3.658859 | -0.009893 |
| N  | 1.162349  | 1.653030  |   |           |           |           |
| C  | -0.761998 | 2.313732  |   |           |           |           |
| C  | -1.985724 | 2.331154  |   |           |           |           |
| C  | -2.411813 | 3.531488  |   |           |           |           |
| H  | -3.293409 | 3.290501  |   |           |           |           |
| H  | -1.623370 | 3.863119  |   |           |           |           |
| H  | -2.679146 | 4.377743  |   |           |           |           |
| H  | -2.793647 | 1.834729  |   |           |           |           |
| H  | -0.617649 | 1.466360  |   |           |           |           |
| C  | 0.124626  | 3.482330  |   |           |           |           |
| H  | -0.317953 | 3.947518  |   |           |           |           |
| H  | 0.081216  | 4.230543  |   |           |           |           |
| C  | 1.564231  | 3.065306  |   |           |           |           |
| C  | 2.182524  | 2.481427  |   |           |           |           |
| H  | 1.564660  | 2.307936  |   |           |           |           |
| H  | 2.156256  | 3.914953  |   |           |           |           |
| H  | 2.516333  | 3.312777  |   |           |           |           |
| H  | 3.060822  | 1.871462  |   |           |           |           |
| S  | 0.888753  | 1.980712  |   |           |           |           |
| O  | -0.482868 | 1.386284  |   |           |           |           |
| O  | 1.061022  | 3.388473  |   |           |           |           |
| C  | 2.001337  | 0.992769  |   |           |           |           |
| H  | 1.869720  | -0.058064 |   |           |           |           |
| H  | 3.025184  | 1.321814  |   |           |           |           |
| H  | 1.733832  | 1.174188  |   |           |           |           |
| Pd | -1.682680 | 0.505725  |   |           |           |           |
| O  | -2.887002 | -0.700618 |   |           |           |           |
| C  | -2.721167 | -1.722403 |   |           |           |           |
| O  | -1.990466 | -1.586295 |   |           |           |           |

**cis-[6,5]-K**

|    |           |           |           |          |           |           |           |
|----|-----------|-----------|-----------|----------|-----------|-----------|-----------|
|    | H         | 2.336983  | -4.983475 | 5.269757 |           |           |           |
|    | H         | 1.379067  | -3.623835 | 5.897366 |           |           |           |
| N  | 0.185423  | -0.140892 | -0.470631 | H        | 0.565817  | -5.144636 | 5.516008  |
| C  | -0.601200 | 0.137424  | 1.831866  | C        | 1.372795  | -4.474772 | 5.205600  |
| C  | 0.375617  | 1.281499  | 1.768399  | N        | -0.573208 | -4.808703 | 0.884336  |
| C  | 1.703212  | 0.938701  | 1.047309  | C        | -1.641828 | -5.116596 | 0.123301  |
| C  | 1.410857  | 0.626649  | -0.430117 | C        | -1.817421 | -6.386147 | -0.418290 |
| H  | 2.279006  | 0.117945  | -0.876699 | C        | -0.852358 | -7.363824 | -0.178385 |
| H  | 1.279767  | 1.568622  | -0.984025 | C        | 0.259490  | -7.032754 | 0.594463  |
| H  | 2.161856  | 0.066984  | 1.530066  | C        | 0.367203  | -5.745314 | 1.113957  |
| H  | 2.404277  | 1.777706  | 1.143047  | H        | 1.214942  | -5.428039 | 1.710812  |
| H  | 0.606778  | 1.607645  | 2.790715  | H        | 1.043634  | -7.754725 | 0.797631  |
| H  | -0.096865 | 2.121740  | 1.246177  | H        | -0.962039 | -8.362259 | -0.591918 |
| H  | -1.475397 | 0.200073  | 1.196536  | H        | -2.695403 | -6.591231 | -1.021643 |
| S  | -0.030881 | -1.530520 | -1.114273 | H        | -2.341687 | -4.311624 | -0.062906 |
| C  | 1.490397  | -2.533478 | -1.080521 |          |           |           |           |
| H  | 1.879879  | -2.604787 | -0.061966 |          |           |           |           |
| H  | 1.232273  | -3.522725 | -1.462556 |          |           |           |           |
| H  | 2.223113  | -2.069742 | -1.745513 |          |           |           |           |
| O  | -0.528662 | -1.611621 | -2.499033 |          |           |           |           |
| O  | -1.035716 | -2.263680 | -0.173979 |          |           |           |           |
| Pd | -0.476489 | -2.873550 | 1.712266  |          |           |           |           |
| C  | -0.581008 | -0.856460 | 2.806475  |          |           |           |           |
| H  | -1.576777 | -1.257912 | 3.034988  |          |           |           |           |
| C  | 0.384095  | -0.784821 | 3.978450  |          |           |           |           |
| H  | 1.427802  | -0.907968 | 3.671519  |          |           |           |           |
| H  | 0.301154  | 0.183430  | 4.492539  |          |           |           |           |
| H  | 0.154469  | -1.565598 | 4.703127  |          |           |           |           |
| O  | -0.101056 | -3.668535 | 3.537495  |          |           |           |           |
| C  | 1.147527  | -3.966359 | 3.787638  |          |           |           |           |
| O  | 2.077929  | -3.849084 | 2.983822  |          |           |           |           |

**cis-[6,5]-L**

|    |           |           |           |   |           |           |           |
|----|-----------|-----------|-----------|---|-----------|-----------|-----------|
|    |           |           |           | C | 1.468940  | -4.346912 | 5.020210  |
|    |           |           |           | H | 0.825070  | -5.214759 | 5.191354  |
| N  | 0.421620  | -0.235031 | -0.355548 | H | 1.264233  | -3.624816 | 5.819729  |
| C  | -0.366812 | 0.220305  | 1.756553  | H | 2.520066  | -4.638950 | 5.068152  |
| C  | 0.947805  | 0.930010  | 1.922294  | C | 0.666299  | -5.286659 | 0.733125  |
| H  | -1.096080 | 0.677430  | 1.101483  | N | -0.505433 | -4.626290 | 0.755712  |
| H  | 1.129258  | 1.125065  | 2.985971  | C | 0.799615  | -6.518905 | 0.097838  |
| H  | 0.911469  | 1.893619  | 1.400677  | C | -1.576430 | -5.161247 | 0.144257  |
| C  | 2.113769  | 0.087920  | 1.346771  | C | -0.310079 | -7.083899 | -0.527841 |
| H  | 2.145715  | -0.888564 | 1.842838  | C | -1.520744 | -6.391406 | -0.503052 |
| H  | 3.071055  | 0.591946  | 1.529329  | H | -2.486731 | -4.573332 | 0.175834  |
| C  | 1.862328  | -0.089337 | -0.160215 | H | -2.411480 | -6.789143 | -0.978394 |
| H  | 2.424025  | -0.947730 | -0.546576 | H | -0.233658 | -8.044555 | -1.029283 |
| H  | 2.203879  | 0.808519  | -0.696745 | H | 1.763920  | -7.016269 | 0.096988  |
| S  | -0.204644 | -1.500585 | -1.050341 | H | 1.493633  | -4.798512 | 1.237102  |
| O  | 0.723090  | -2.545786 | -1.528683 |   |           |           |           |
| C  | -1.156204 | -0.915985 | -2.471508 |   |           |           |           |
| H  | -1.838014 | -0.132765 | -2.137272 |   |           |           |           |
| H  | -1.709809 | -1.761493 | -2.885103 |   |           |           |           |
| H  | -0.448906 | -0.524898 | -3.205503 |   |           |           |           |
| O  | -1.357798 | -2.005002 | -0.154319 |   |           |           |           |
| Pd | -0.638802 | -2.724722 | 1.673366  |   |           |           |           |
| C  | -0.836863 | -0.768257 | 2.663787  |   |           |           |           |
| H  | -1.931474 | -0.819861 | 2.672631  |   |           |           |           |
| C  | -0.222454 | -0.807708 | 4.063154  |   |           |           |           |
| H  | 0.852019  | -1.008684 | 4.044178  |   |           |           |           |
| H  | -0.376495 | 0.154851  | 4.573584  |   |           |           |           |
| H  | -0.693415 | -1.587989 | 4.662068  |   |           |           |           |
| O  | -0.111896 | -3.591157 | 3.432334  |   |           |           |           |
| C  | 1.166239  | -3.702771 | 3.671854  |   |           |           |           |
| O  | 2.069892  | -3.320977 | 2.920432  |   |           |           |           |

|                           |           |           |           |   |           |           |           |
|---------------------------|-----------|-----------|-----------|---|-----------|-----------|-----------|
| <b><i>cis</i>-[6,5]-M</b> |           |           |           | H | 1.121962  | -1.480838 | 2.742653  |
|                           |           |           |           | H | 1.181640  | 0.219688  | 3.216885  |
| C                         | 0.268297  | -0.046681 | -0.437662 | H | 3.039332  | -0.687733 | 1.558726  |
| N                         | -0.305386 | -0.343309 | 1.748058  | H | 2.293384  | 0.878851  | 1.219264  |
| C                         | 1.019960  | -0.454240 | 2.364874  | H | -2.058125 | 1.739500  | 4.219012  |
| C                         | 2.095127  | -0.194487 | 1.297873  | H | -1.595401 | 0.015785  | 4.414016  |
| C                         | 1.549950  | -0.727973 | -0.035965 | H | -0.332853 | 1.296781  | 4.353050  |
| S                         | -1.297137 | 0.812370  | 2.181908  | H | -1.715925 | 5.617863  | -0.535561 |
| O                         | -2.669853 | 0.505383  | 1.740440  | H | -3.329776 | 7.355536  | 0.296388  |
| C                         | 0.228851  | 1.242910  | -1.041662 | H | -5.256235 | 6.619108  | 1.733151  |
| C                         | 1.505178  | 2.060092  | -1.221063 | H | -5.466134 | 4.176618  | 2.289338  |
| C                         | -1.310084 | 0.979135  | 3.987547  | H | -3.735196 | 2.591186  | 1.410681  |
| O                         | -0.836523 | 2.221847  | 1.757582  | H | -2.752542 | 4.330477  | -4.273793 |
| Pd                        | -1.254300 | 2.628474  | -0.262388 | H | -1.190341 | 5.118850  | -4.645228 |
| O                         | -1.752411 | 3.001009  | -2.202610 | H | -1.388084 | 3.347641  | -4.801263 |
| C                         | -1.230252 | 4.059012  | -2.764538 |   |           |           |           |
| O                         | -0.470312 | 4.862066  | -2.215116 |   |           |           |           |
| N                         | -2.672253 | 4.059796  | 0.419279  |   |           |           |           |
| C                         | -3.698397 | 3.653638  | 1.190111  |   |           |           |           |
| C                         | -4.649525 | 4.546170  | 1.677400  |   |           |           |           |
| C                         | -4.529993 | 5.900066  | 1.364258  |   |           |           |           |
| C                         | -3.463488 | 6.313222  | 0.567242  |   |           |           |           |
| C                         | -2.553220 | 5.364148  | 0.106918  |   |           |           |           |
| C                         | -1.662889 | 4.232541  | -4.217376 |   |           |           |           |
| H                         | -0.396682 | 1.187218  | -1.939263 |   |           |           |           |
| H                         | -0.581915 | -0.690008 | -0.637482 |   |           |           |           |
| H                         | 2.293973  | 1.487483  | -1.734331 |   |           |           |           |
| H                         | 1.297764  | 2.953622  | -1.814006 |   |           |           |           |
| H                         | 1.917308  | 2.403392  | -0.266196 |   |           |           |           |
| H                         | 1.381963  | -1.807582 | 0.046269  |   |           |           |           |
| H                         | 2.291373  | -0.560184 | -0.829595 |   |           |           |           |

|                     |           |           |           |   |           |           |           |
|---------------------|-----------|-----------|-----------|---|-----------|-----------|-----------|
| <i>cis</i> -[6,5]-N |           |           |           | H | 3.533559  | -1.609017 | 2.182306  |
|                     |           |           |           | H | 1.835579  | -1.233120 | 2.544210  |
| C                   | 2.812556  | 0.246545  | -0.819419 | H | 3.597036  | 0.765629  | 2.515836  |
| N                   | 2.302101  | -1.574268 | 0.489932  | H | 2.039500  | 1.012370  | 1.703648  |
| C                   | 2.642885  | -1.074198 | 1.819902  | H | -1.955910 | 0.680587  | 1.628617  |
| C                   | 2.963826  | 0.424168  | 1.687453  | H | -4.201567 | -0.134438 | 2.392897  |
| C                   | 3.693027  | 0.631341  | 0.336470  | H | -5.556058 | -1.571328 | 0.838265  |
| S                   | 0.918667  | -2.258563 | 0.182657  | H | -4.585494 | -2.143737 | -1.409380 |
| C                   | 1.269183  | -3.910536 | -0.461596 | H | -2.316065 | -1.270738 | -1.988416 |
| C                   | 1.844019  | 1.120734  | -1.384152 | H | -1.378494 | 4.607364  | 1.696468  |
| C                   | 1.988412  | 2.619235  | -1.117837 | H | -0.477730 | 4.946778  | 0.198494  |
| O                   | -0.034176 | -2.404479 | 1.301919  | H | -2.153339 | 4.402371  | 0.091055  |
| O                   | 0.341890  | -1.599490 | -1.090148 | H | 0.331690  | -4.349245 | -0.809540 |
| Pd                  | -0.141020 | 0.407509  | -0.752521 | H | 1.983120  | -3.821624 | -1.281596 |
| O                   | -0.798516 | 2.319632  | -0.568736 | H | 1.689711  | -4.501869 | 0.354155  |
| C                   | -0.729404 | 2.852184  | 0.620832  |   |           |           |           |
| O                   | -0.294473 | 2.289398  | 1.631325  |   |           |           |           |
| N                   | -2.074406 | -0.255521 | -0.206410 |   |           |           |           |
| C                   | -2.785007 | -1.034962 | -1.039843 |   |           |           |           |
| C                   | -4.043670 | -1.522791 | -0.703403 |   |           |           |           |
| C                   | -4.577607 | -1.201749 | 0.544681  |   |           |           |           |
| C                   | -3.831331 | -0.402874 | 1.408965  |   |           |           |           |
| C                   | -2.581316 | 0.055541  | 1.000169  |   |           |           |           |
| C                   | -1.226367 | 4.292999  | 0.661828  |   |           |           |           |
| H                   | 1.655370  | 0.886996  | -2.438046 |   |           |           |           |
| H                   | 3.123073  | -0.599997 | -1.416798 |   |           |           |           |
| H                   | 2.959583  | 2.979746  | -1.488842 |   |           |           |           |
| H                   | 1.202373  | 3.173147  | -1.632292 |   |           |           |           |
| H                   | 1.924005  | 2.864561  | -0.054392 |   |           |           |           |
| H                   | 4.602139  | 0.018731  | 0.323441  |   |           |           |           |
| H                   | 3.989252  | 1.682639  | 0.239498  |   |           |           |           |

**cis-[6,5]-O**

|    |           |           |           |          |           |           |           |
|----|-----------|-----------|-----------|----------|-----------|-----------|-----------|
|    |           |           | H         | 3.011602 | -3.425471 | 6.584377  |           |
|    |           |           | H         | 1.321497 | -3.923445 | 6.274341  |           |
| N  | -0.072850 | -0.272851 | -0.130918 | H        | 1.698897  | -2.214571 | 6.484118  |
| C  | 0.381209  | 0.178175  | 2.111331  | N        | 1.228989  | -4.557135 | 1.582402  |
| C  | 2.885601  | 0.329643  | 1.670952  | C        | 0.268802  | -5.055085 | 0.779960  |
| H  | 3.781527  | -0.272029 | 1.849617  | H        | -0.394162 | -4.334710 | 0.311630  |
| H  | 3.080041  | 1.337720  | 2.066181  | C        | 2.106383  | -5.397788 | 2.165136  |
| H  | 2.738869  | 0.412692  | 0.589273  | H        | 2.855518  | -4.933681 | 2.798606  |
| H  | -0.402990 | -0.341018 | 2.666268  | C        | 2.047834  | -6.774366 | 1.963354  |
| H  | 1.815283  | -0.667801 | 3.347741  | H        | 2.778484  | -7.414671 | 2.446874  |
| C  | -0.052587 | 1.523496  | 1.606821  | C        | 1.049860  | -7.298531 | 1.142963  |
| H  | -0.176817 | 2.142022  | 2.512745  | H        | 0.979481  | -8.369127 | 0.971520  |
| H  | 0.723385  | 1.990708  | 0.994309  | C        | 0.146525  | -6.422068 | 0.543623  |
| C  | -1.394288 | 1.449806  | 0.863491  | H        | -0.645715 | -6.780171 | -0.105746 |
| H  | -2.140854 | 0.992525  | 1.525918  | C        | 1.679815  | -0.309101 | 2.325062  |
| H  | -1.757749 | 2.451584  | 0.610620  |          |           |           |           |
| C  | -1.215538 | 0.581503  | -0.405126 |          |           |           |           |
| H  | -2.136998 | 0.022676  | -0.619700 |          |           |           |           |
| H  | -1.014620 | 1.235669  | -1.269728 |          |           |           |           |
| S  | 0.158358  | -1.645818 | -0.839044 |          |           |           |           |
| O  | 1.400343  | -2.254499 | -0.175485 |          |           |           |           |
| O  | -0.999501 | -2.564817 | -0.962936 |          |           |           |           |
| C  | 0.778732  | -1.381546 | -2.521702 |          |           |           |           |
| H  | 1.665693  | -0.748913 | -2.469247 |          |           |           |           |
| H  | -0.010429 | -0.899372 | -3.103792 |          |           |           |           |
| H  | 1.021390  | -2.355289 | -2.951731 |          |           |           |           |
| Pd | 1.387913  | -2.462568 | 1.903310  |          |           |           |           |
| O  | 1.238376  | -2.698482 | 3.918280  |          |           |           |           |
| C  | 2.319970  | -3.029749 | 4.579395  |          |           |           |           |
| O  | 3.427075  | -3.231891 | 4.077116  |          |           |           |           |
| C  | 2.080967  | -3.158179 | 6.080218  |          |           |           |           |



**cis-[6,5]-P**

|    |           |           |           |
|----|-----------|-----------|-----------|
| N  | 0.854756  | -4.510960 | 1.707706  |
| C  | -0.020733 | -5.529530 | 1.651789  |
| H  | -1.029191 | -5.310390 | 1.983868  |
| C  | 2.117673  | -4.701631 | 1.285528  |
| H  | 2.772387  | -3.839009 | 1.348765  |
| C  | 2.547924  | -5.933004 | 0.797270  |
| H  | 3.573422  | -6.043749 | 0.460600  |
| C  | 1.647930  | -6.995862 | 0.747695  |
| H  | 1.958120  | -7.967092 | 0.372673  |
| C  | 0.339185  | -6.789321 | 1.184041  |
| H  | -0.398218 | -7.585130 | 1.162188  |
| C  | -0.446115 | -0.647591 | 3.128110  |
| H  | -2.568094 | -3.344740 | -1.428383 |
| H  | -3.126330 | -1.725267 | -0.886045 |
| H  | -2.134850 | -1.882528 | -2.374917 |
| N  | -0.595045 | -0.547631 | -0.181376 |
| C  | -0.766034 | 0.157926  | 2.001179  |
| C  | 0.545313  | -0.090377 | 4.149812  |
| H  | 0.675250  | -0.792686 | 4.973958  |
| H  | 0.171730  | 0.857935  | 4.564456  |
| H  | 1.531643  | 0.098394  | 3.717652  |
| H  | -1.789707 | 0.136863  | 1.652523  |
| H  | -1.345138 | -1.072964 | 3.588252  |
| C  | 0.095402  | 1.297579  | 1.533752  |
| H  | -0.515619 | 2.008650  | 0.965439  |
| H  | 0.512268  | 1.823609  | 2.400870  |
| C  | 1.250515  | 0.792199  | 0.633692  |
| H  | 1.903463  | 1.627348  | 0.350936  |
| H  | 1.854914  | 0.061078  | 1.182136  |
| C  | 0.622541  | 0.137942  | -0.608566 |
| H  | 0.353517  | 0.917637  | -1.336831 |
| H  | 1.336274  | -0.541218 | -1.089136 |
| S  | -0.810954 | -2.089582 | -0.410032 |
| O  | -1.277499 | -2.701504 | 0.929735  |
| C  | -2.326157 | -2.281153 | -1.376683 |
| O  | 0.261435  | -2.833822 | -1.101434 |
| Pd | 0.231494  | -2.602529 | 2.374895  |
| O  | 1.618400  | -2.720714 | 3.853007  |
| C  | 2.822854  | -2.310895 | 3.561801  |
| O  | 3.178231  | -1.856765 | 2.468888  |
| C  | 3.791999  | -2.418915 | 4.733848  |
| H  | 4.819174  | -2.300872 | 4.382526  |
| H  | 3.674521  | -3.376296 | 5.250228  |
| H  | 3.571539  | -1.626642 | 5.459281  |

## References:

---

- (1) Steinhoff, B. A.; Guzei, I. A.; Stahl, S. S. *J. Am. Chem. Soc.* **2004**, *126*, 11268-11278.
- (2) A mechanism involving dissociation of acetate to form a cationic intermediate is unlikely given the non-polar nature of the solvent medium. Evaluation of the free energy to form a charge-separated species suggests it is disfavored by more than 30 kcal/mol.

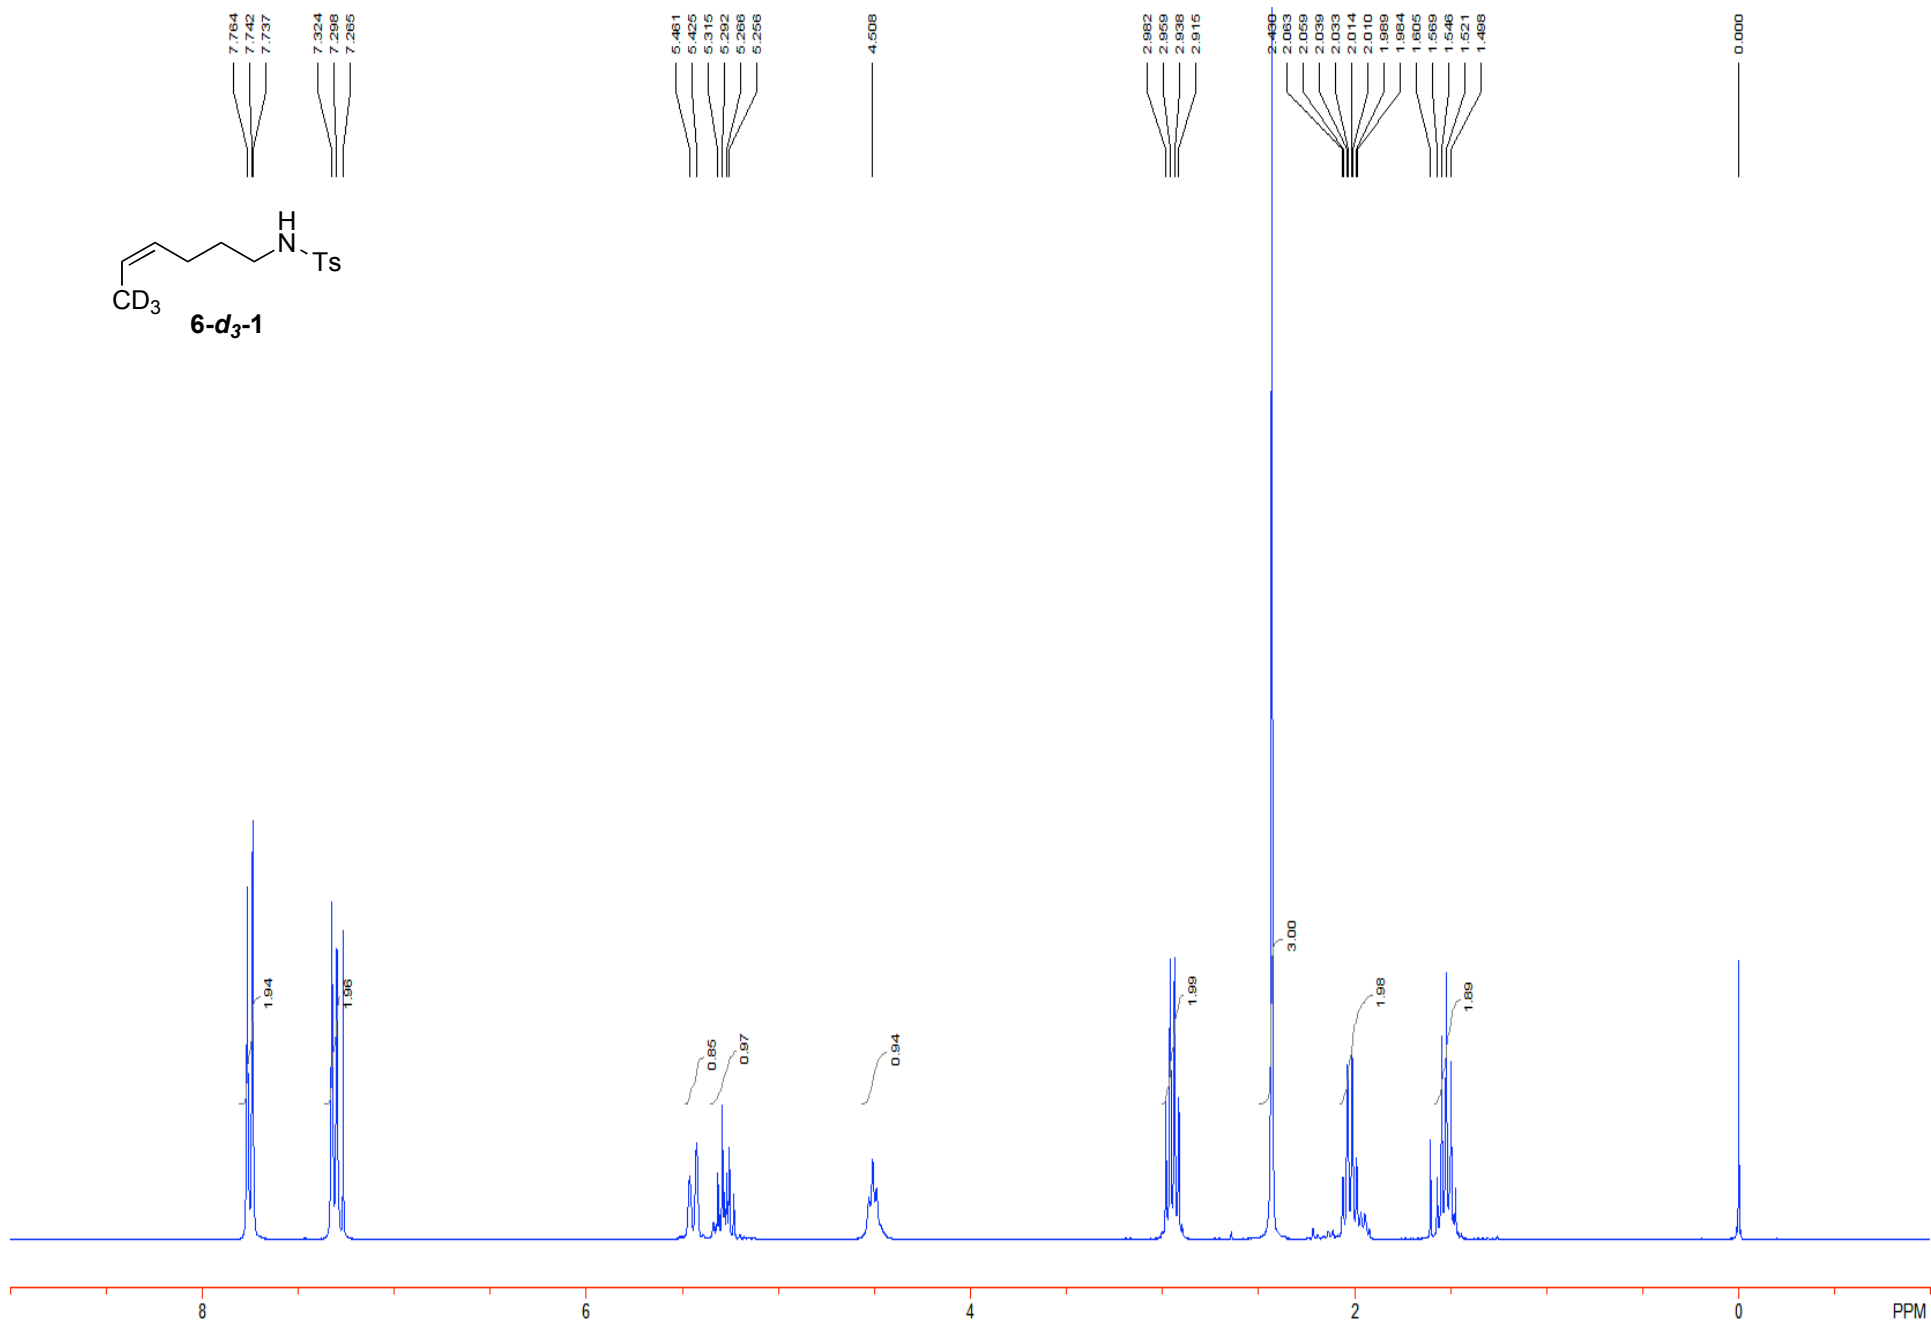

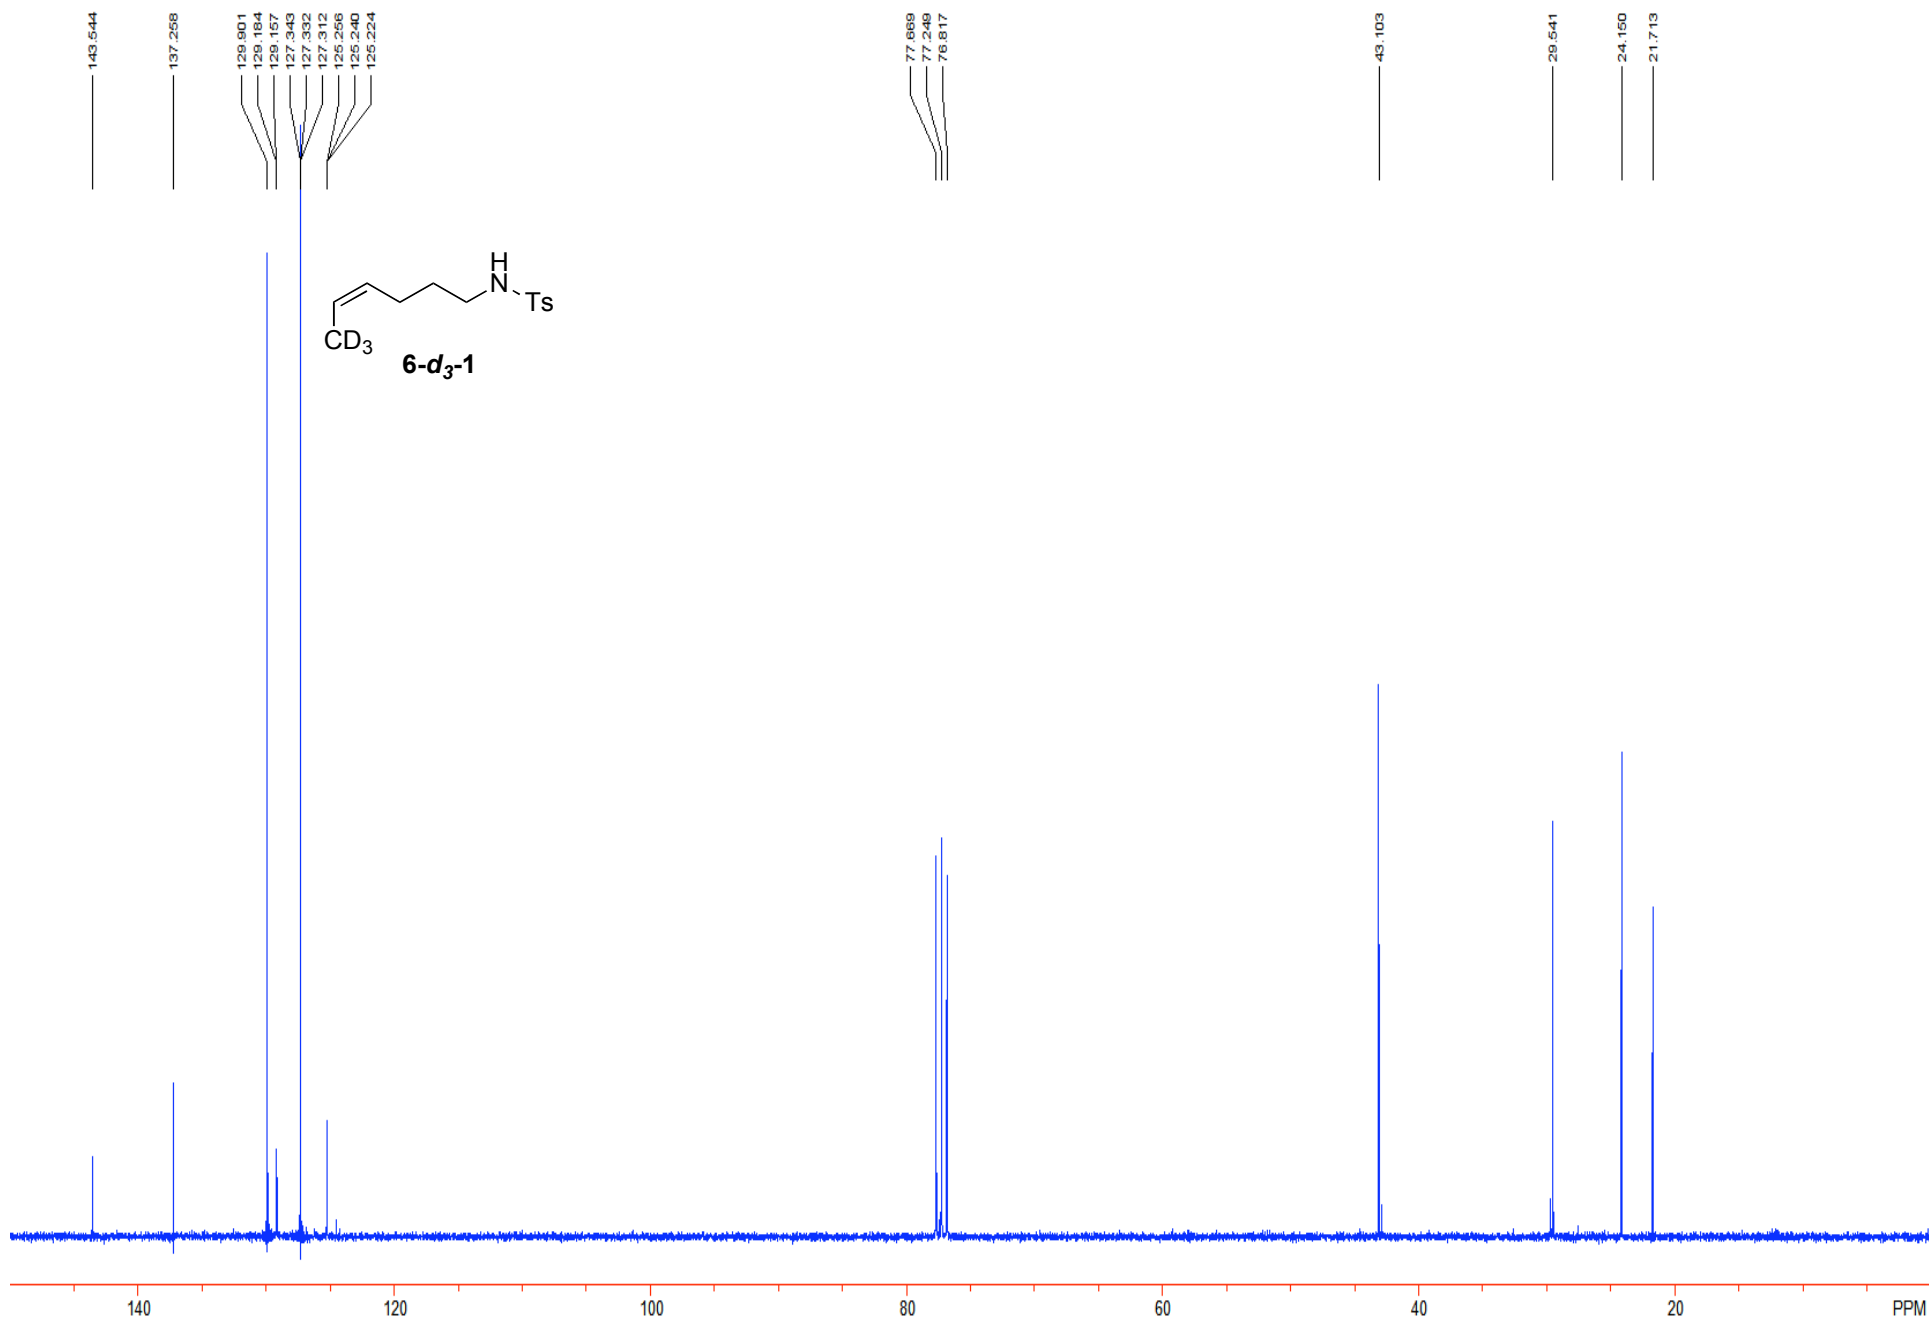

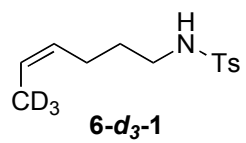

7.270

1.520

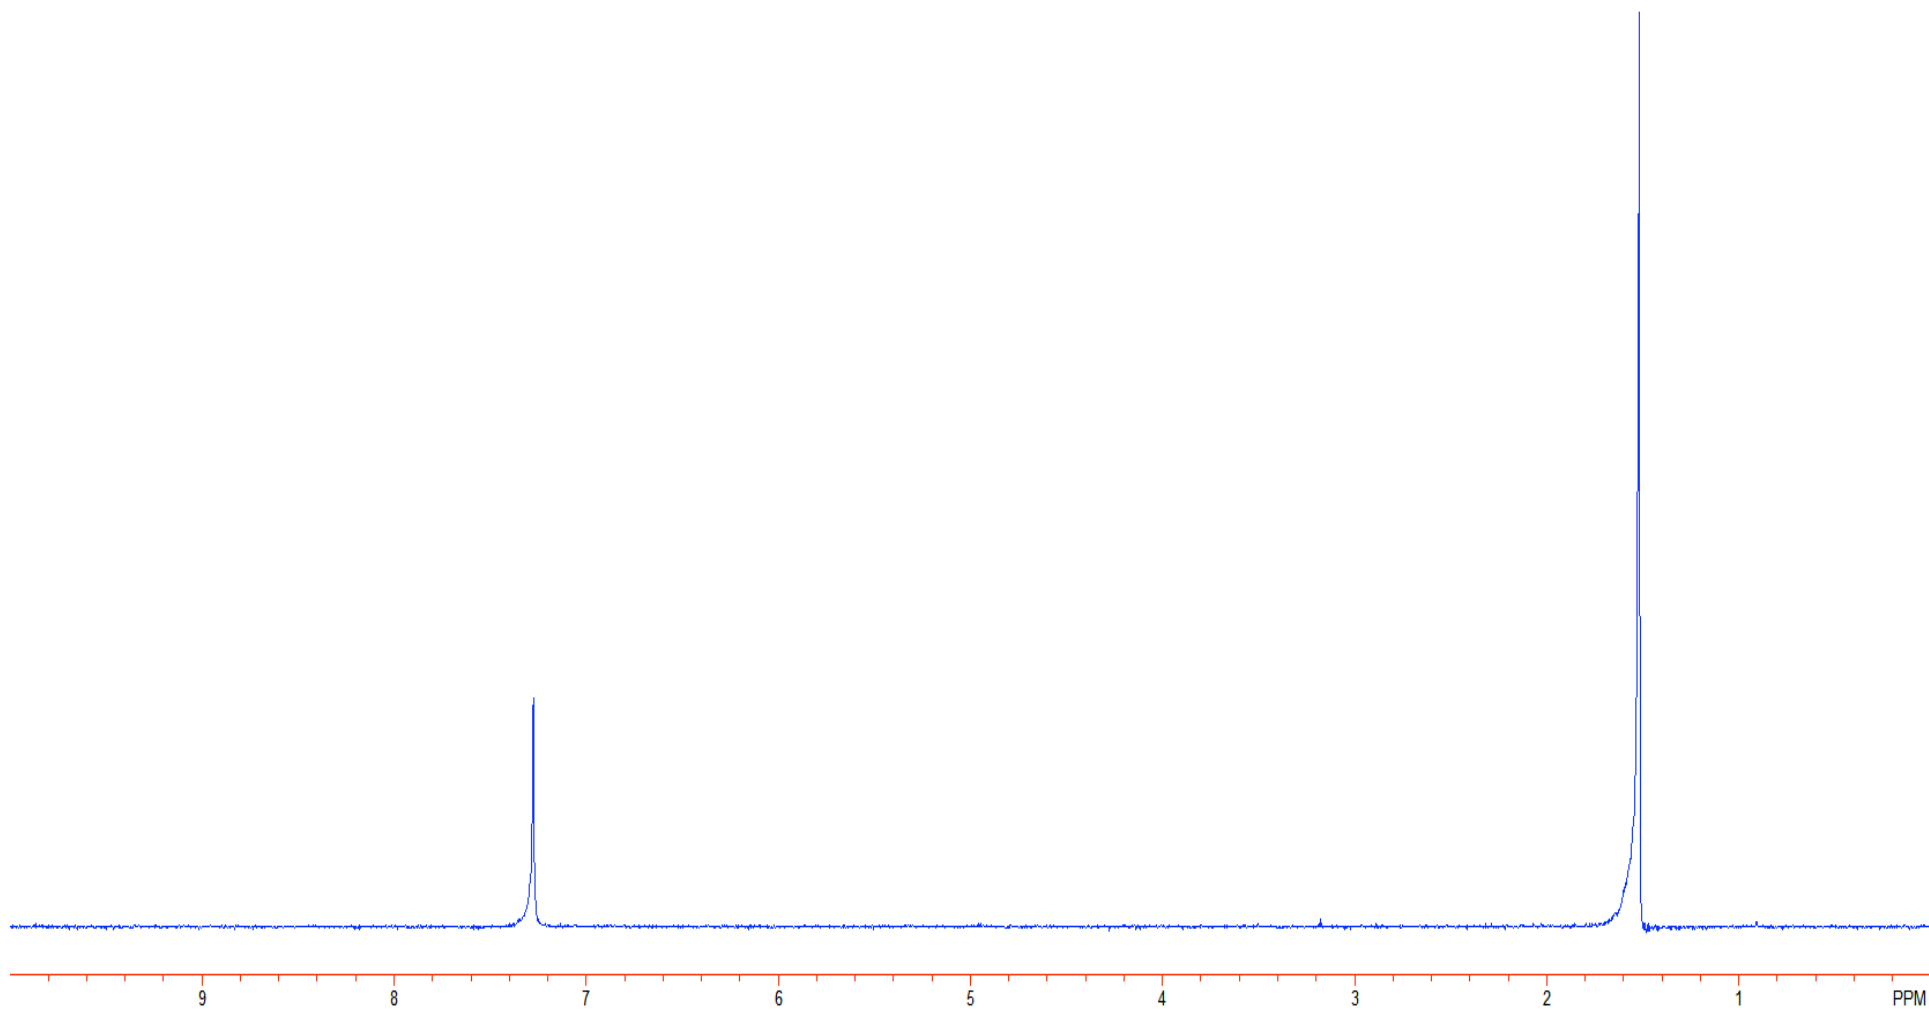

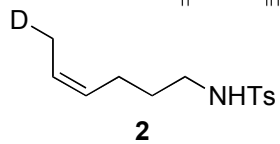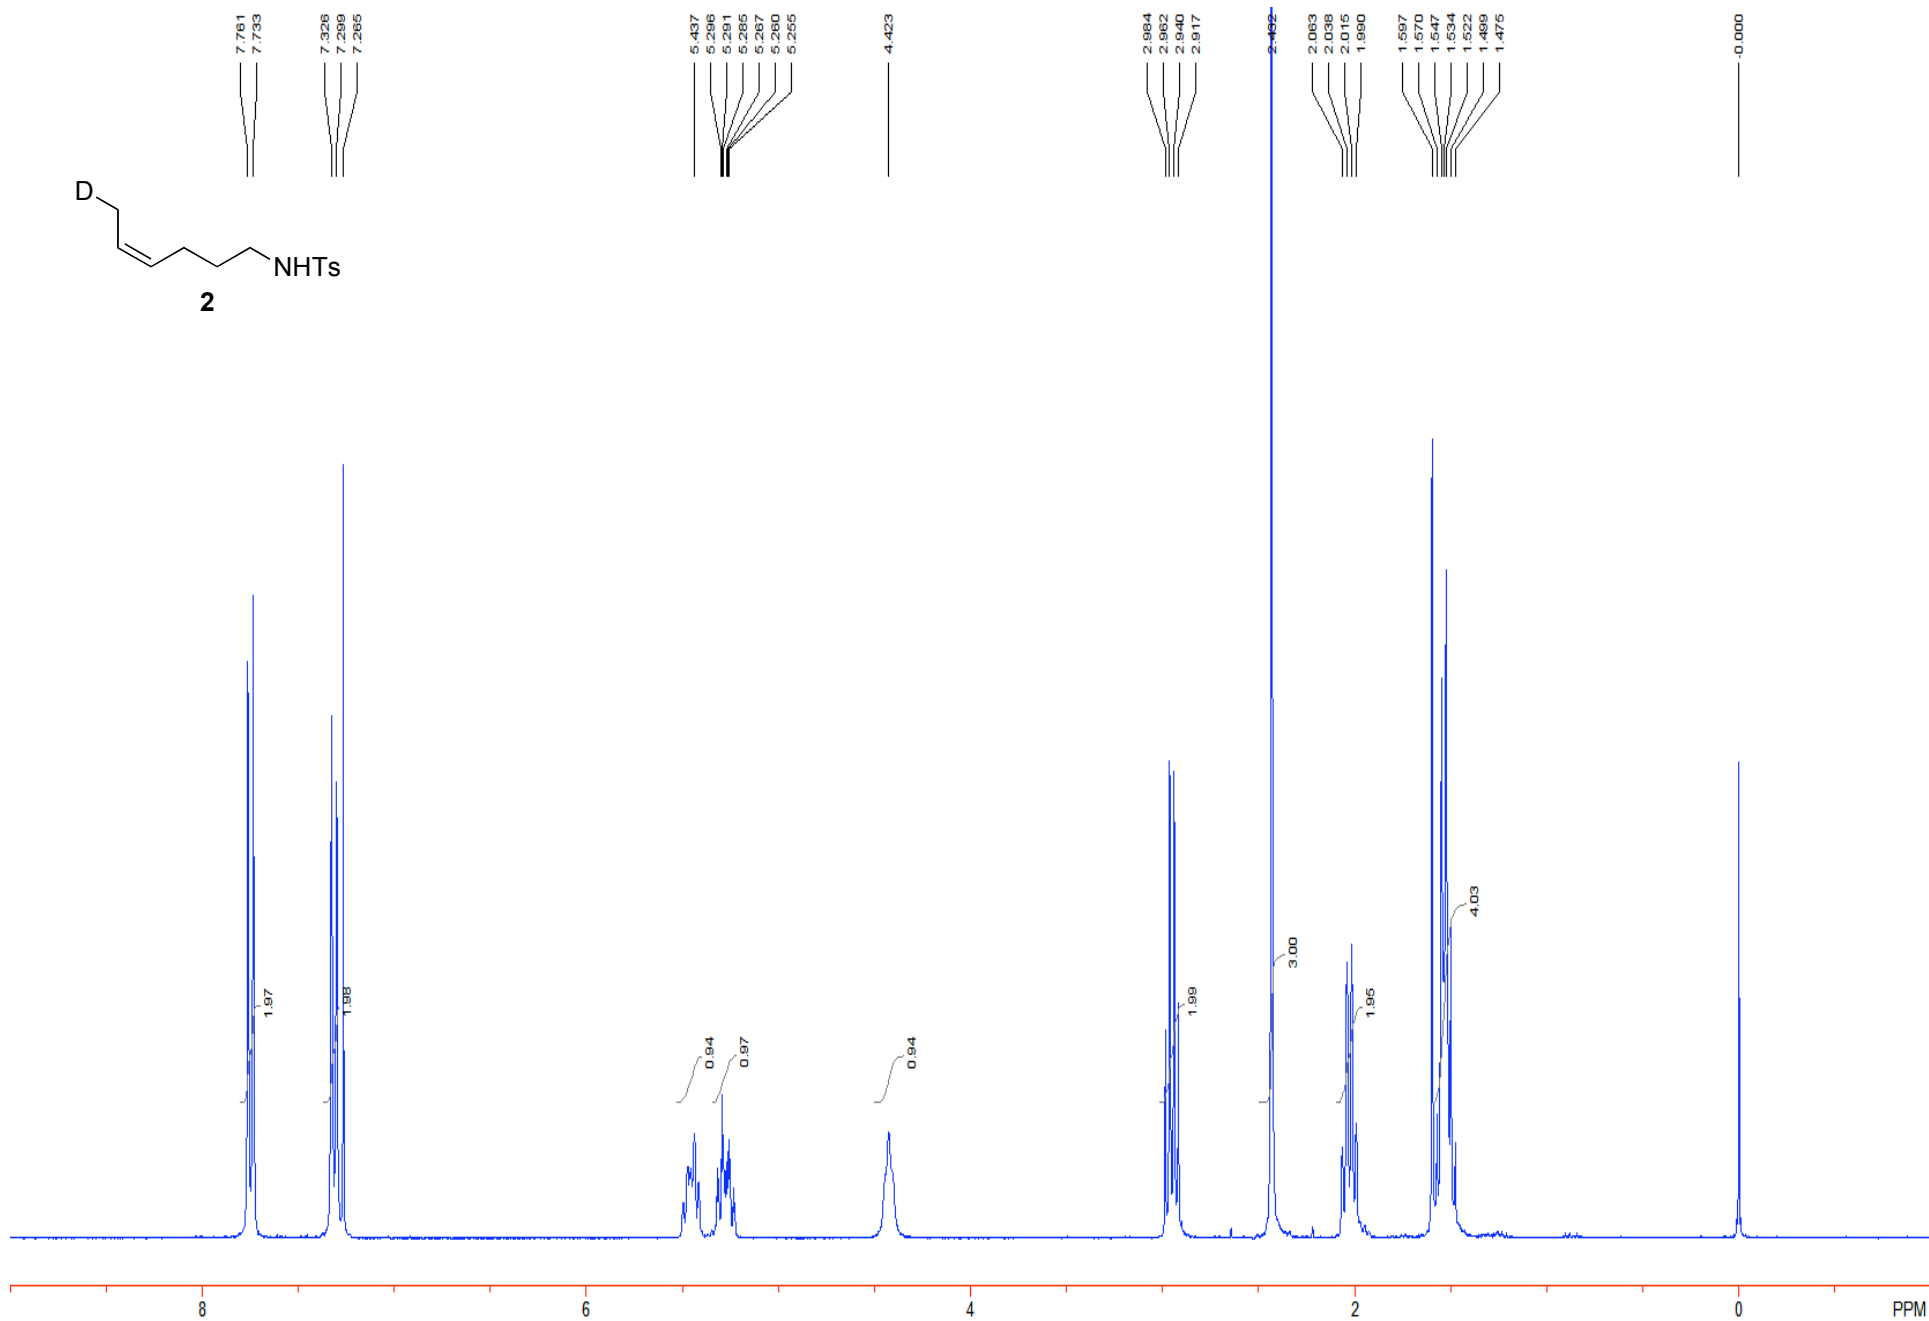

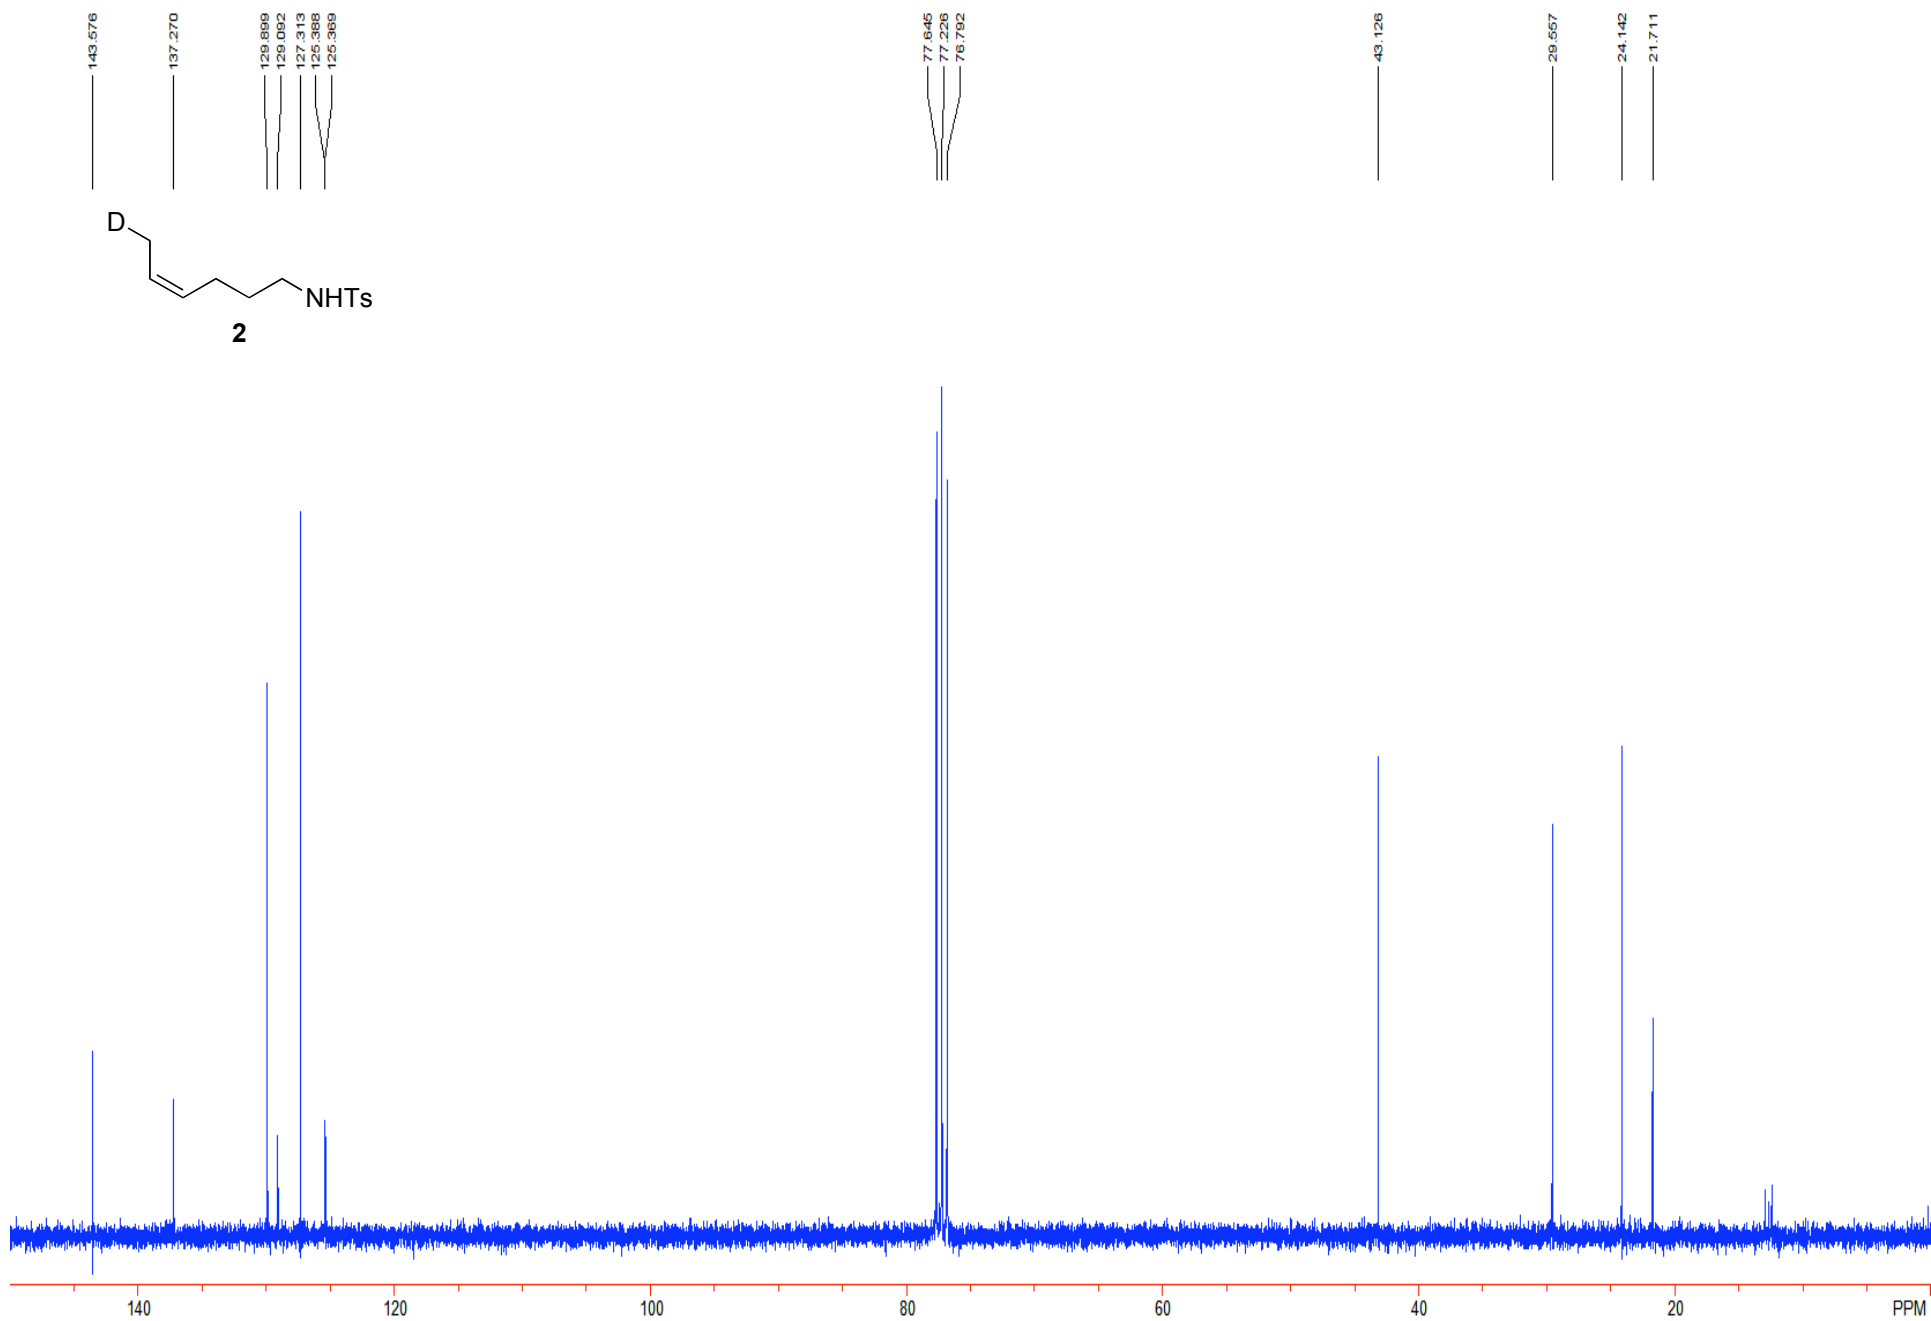

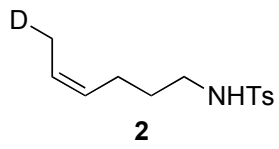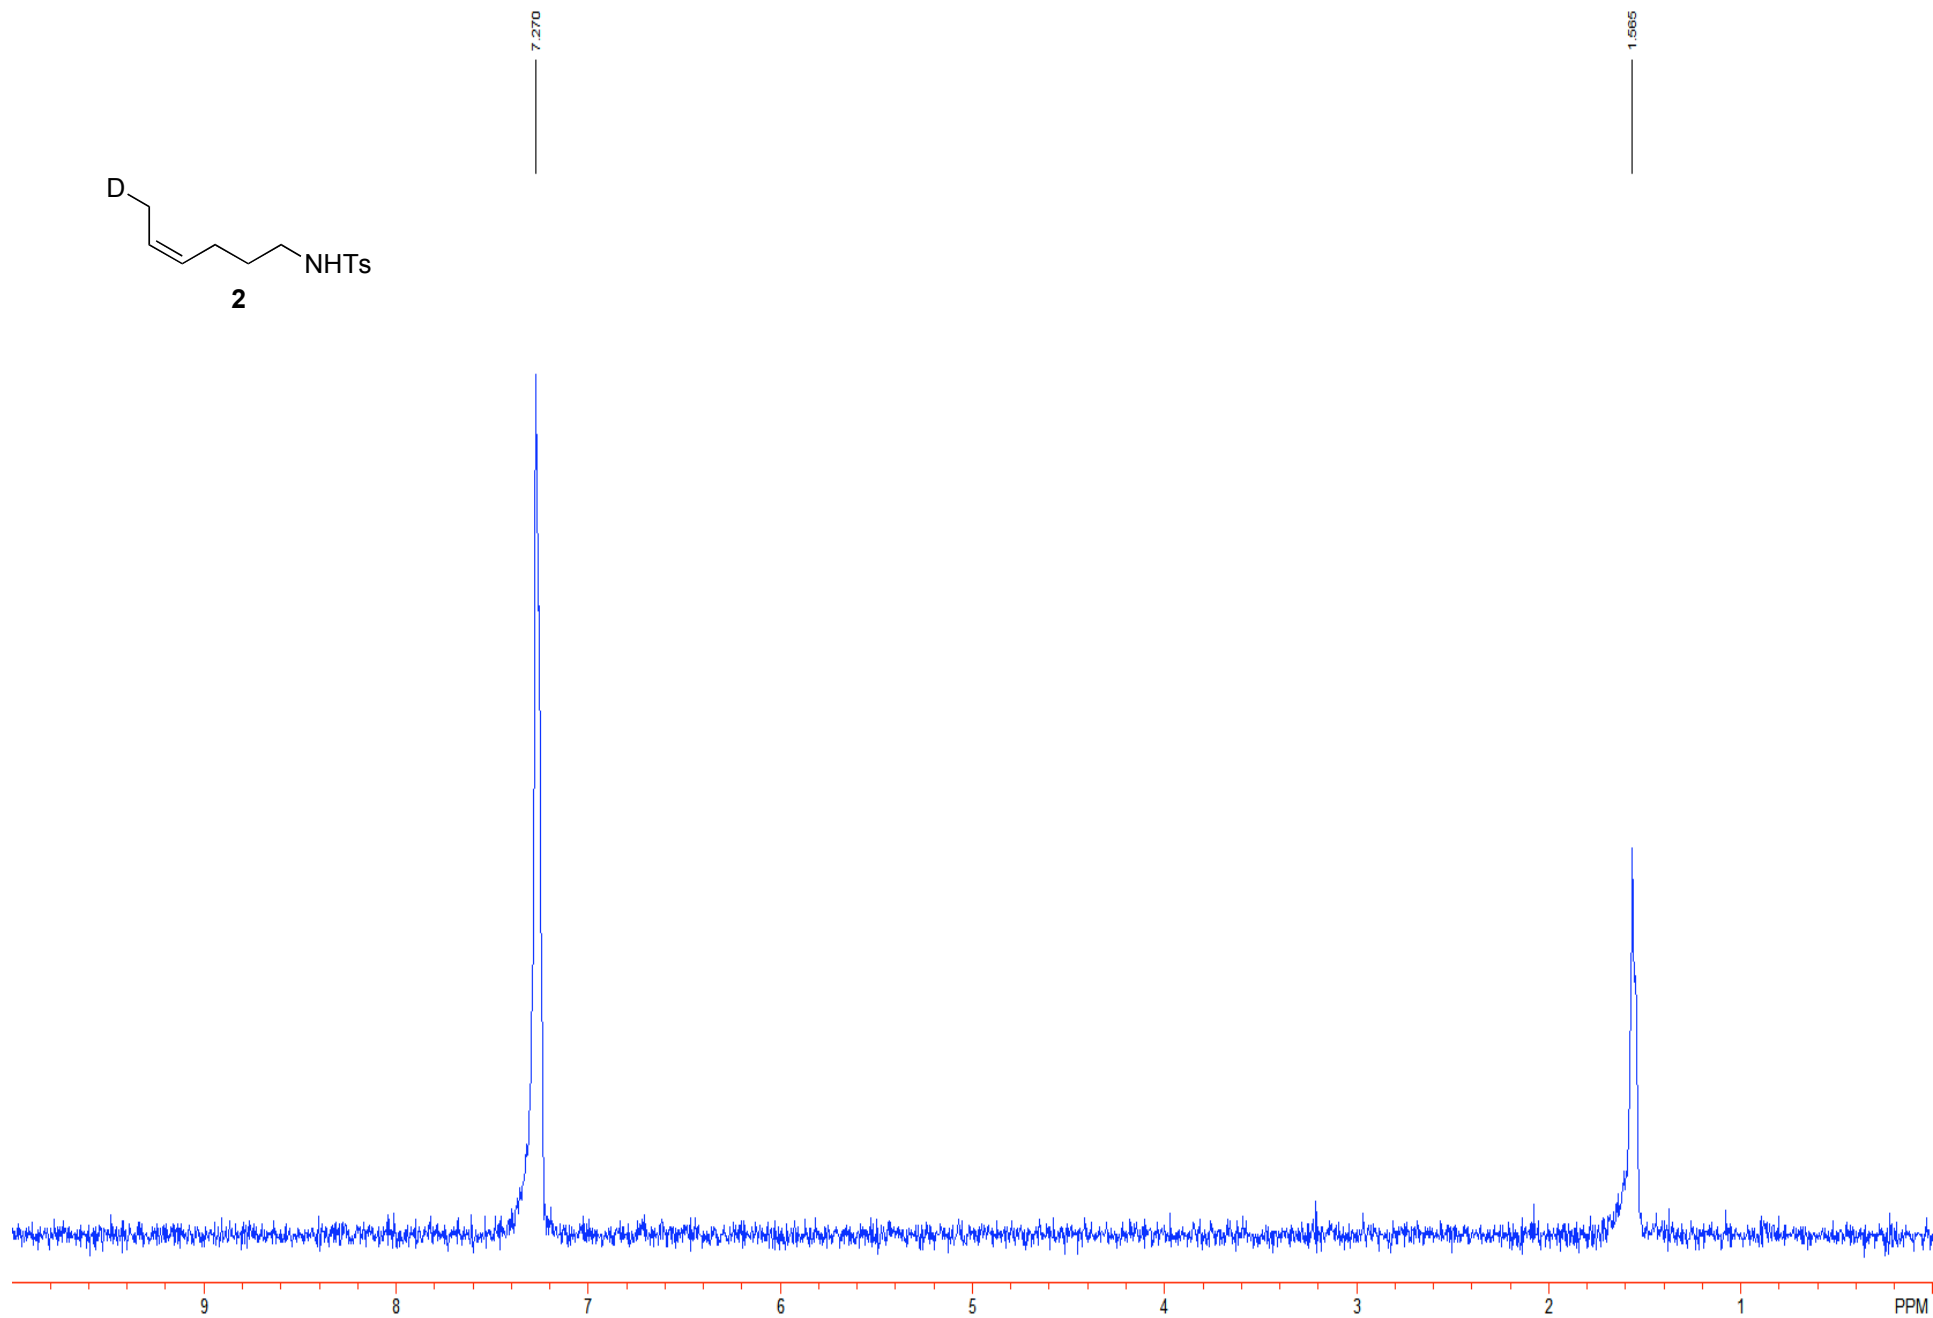

S80



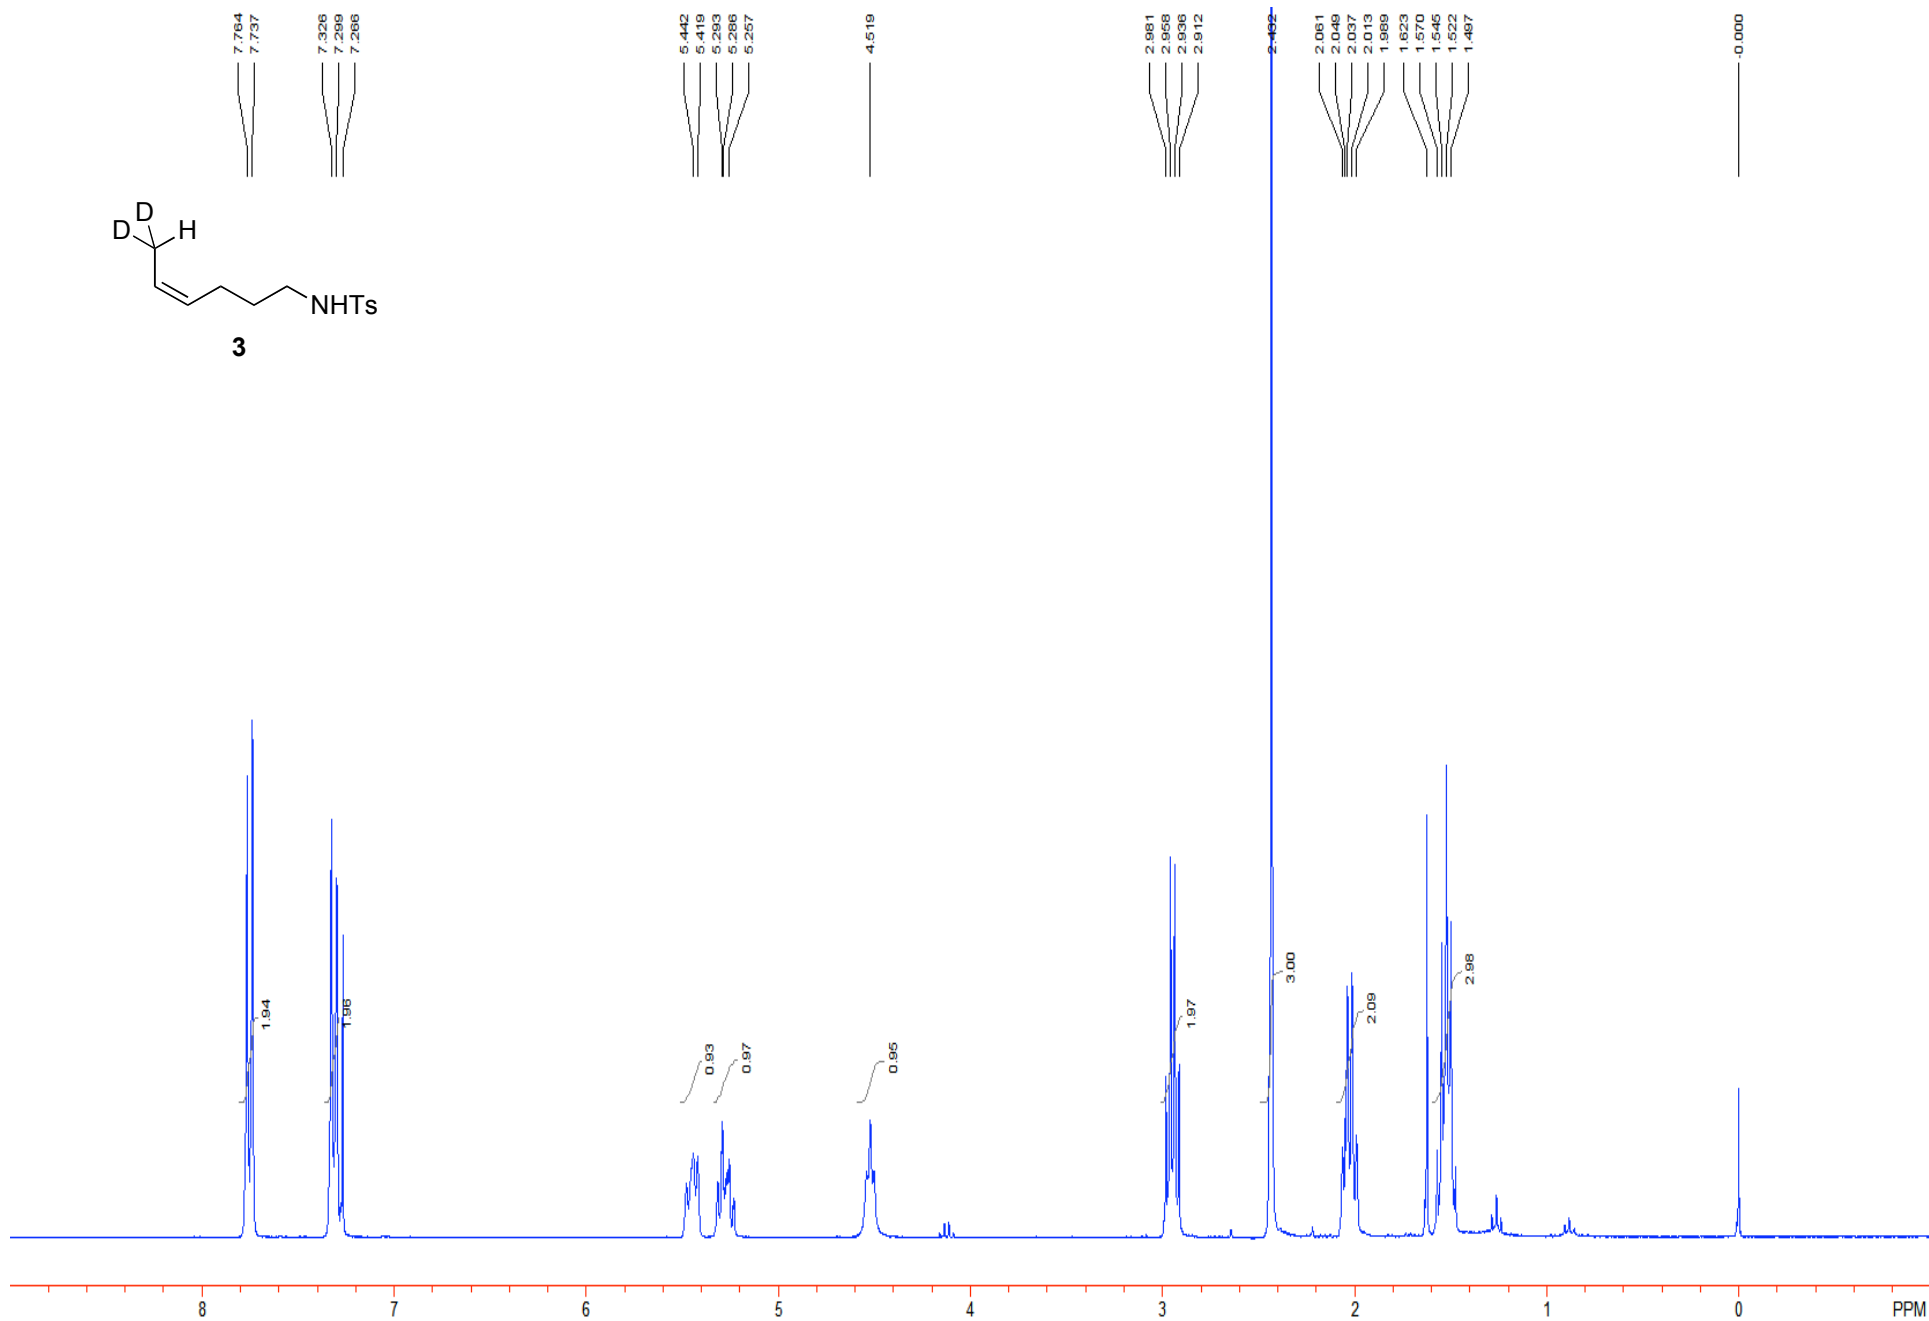

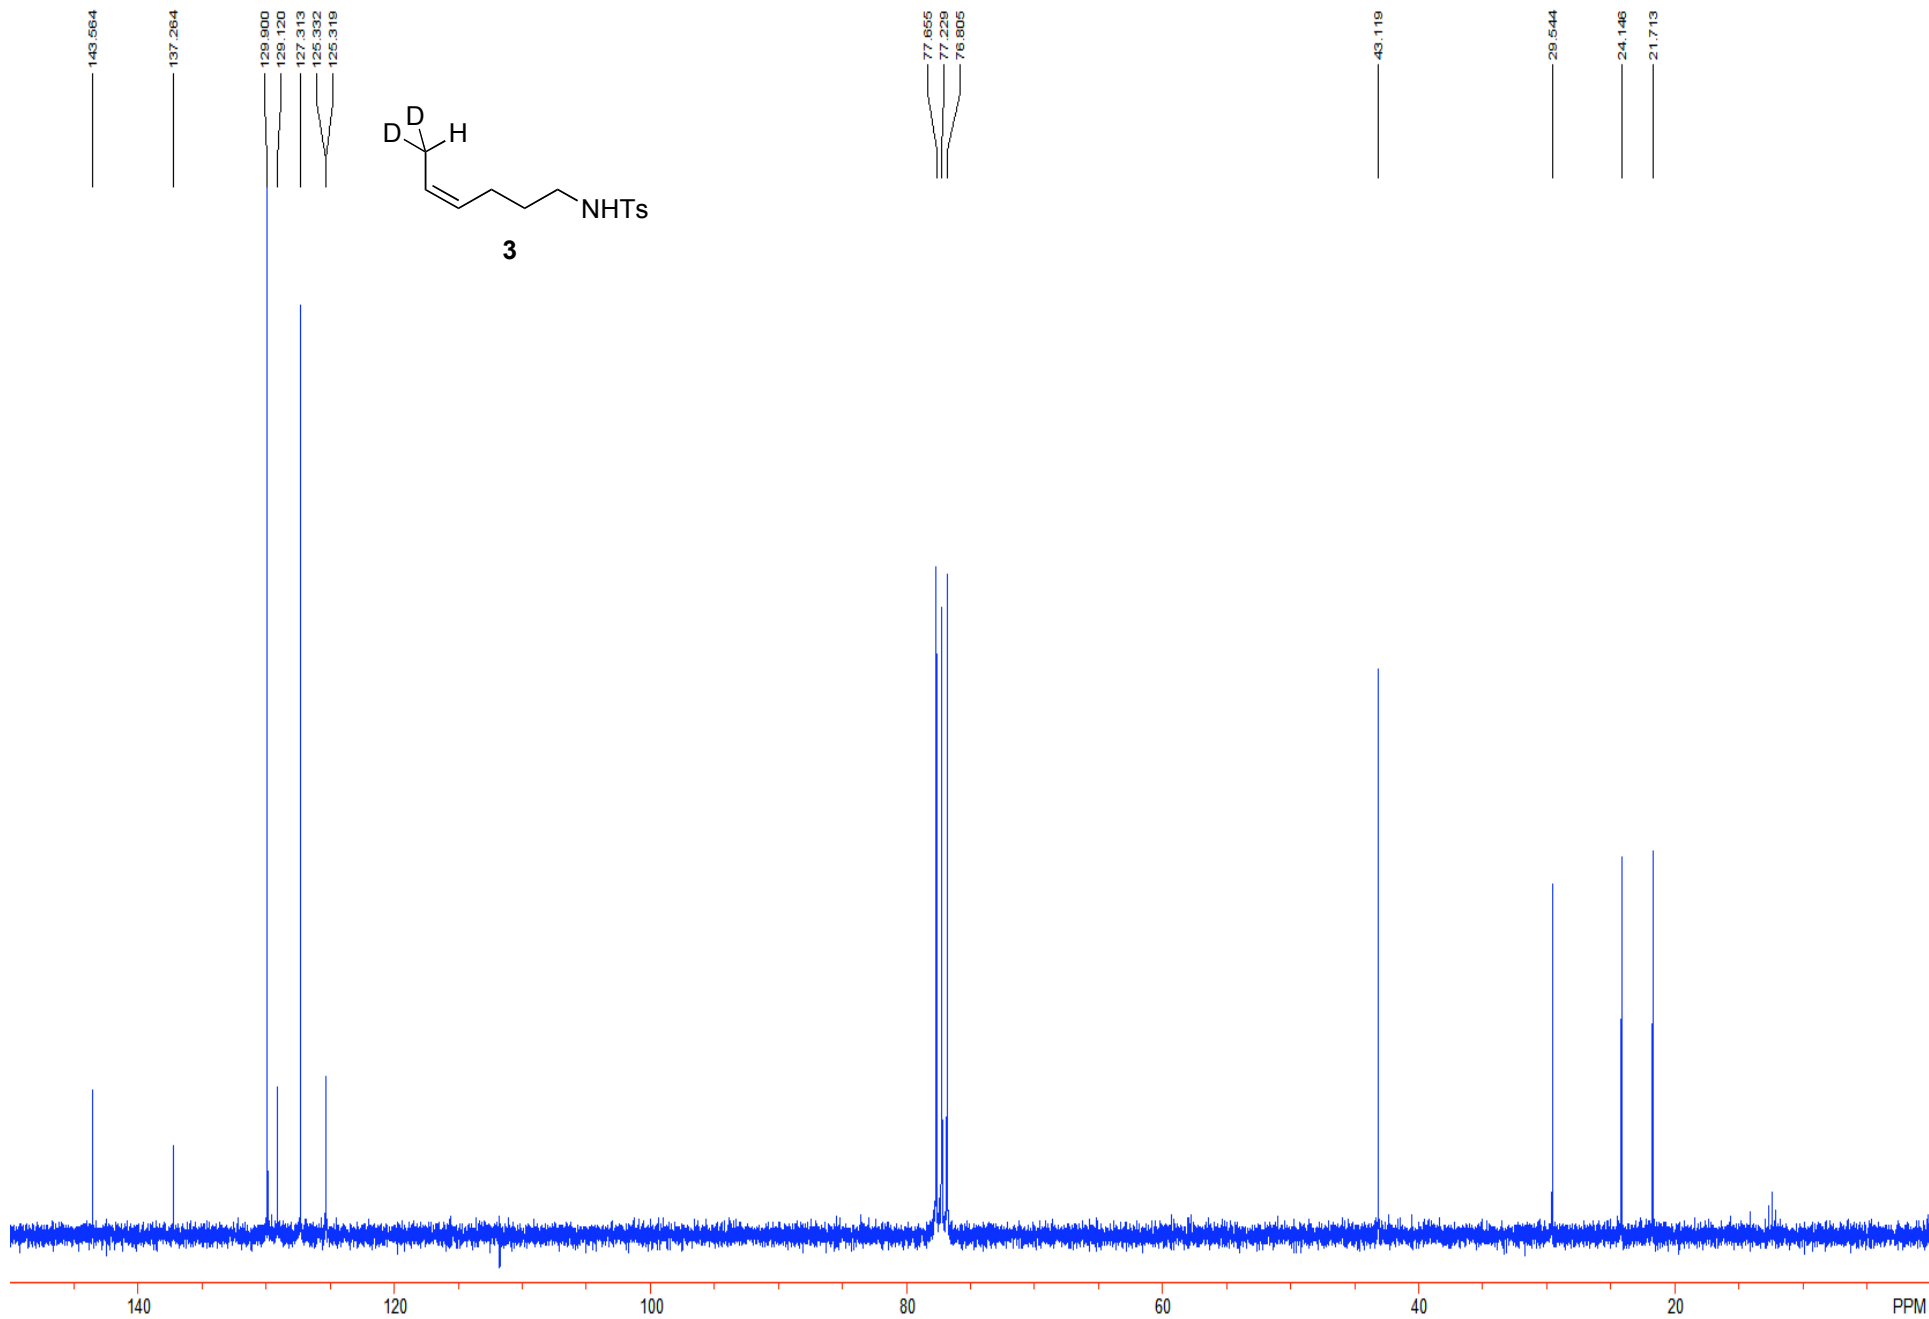

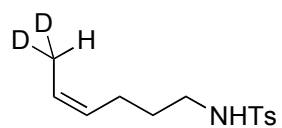

**3**

7.270

1.547  
1.516

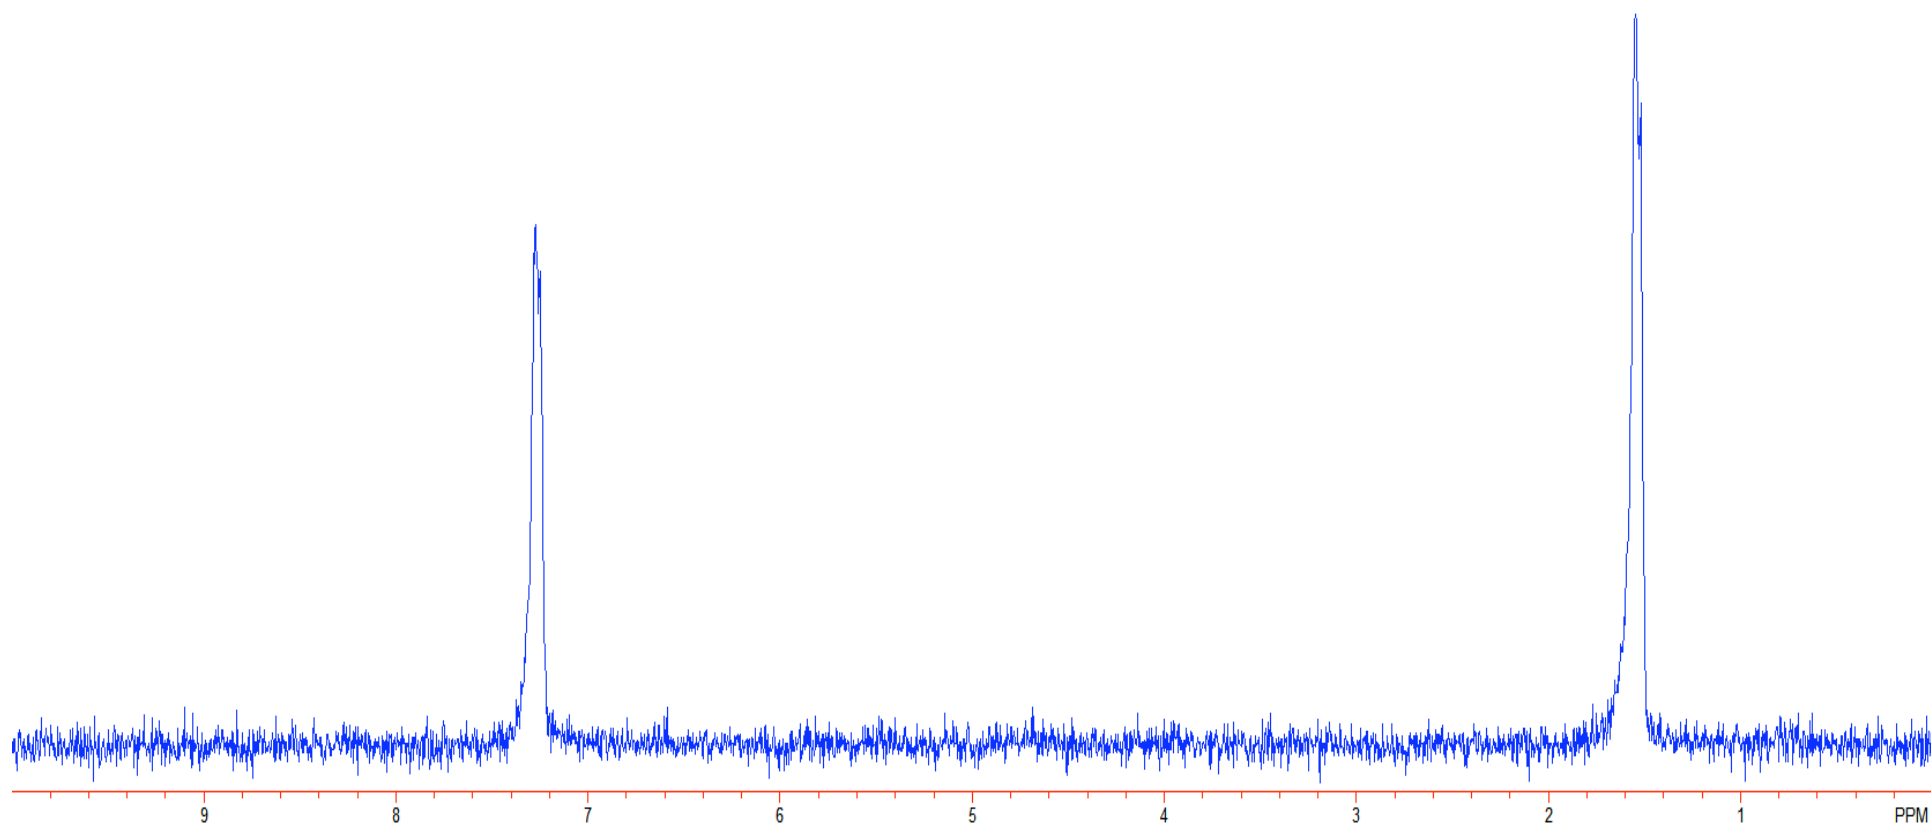

S83

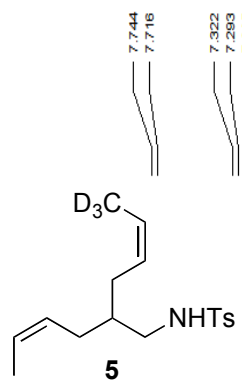

7.744  
7.716

7.922  
7.893  
7.865

5.519  
5.483  
5.339  
5.314  
5.308  
5.302  
5.290  
5.277

4.539

2.885  
2.885  
2.844

2.491

2.030  
2.006  
1.983

1.819  
1.807  
1.597  
1.588  
1.545  
1.543

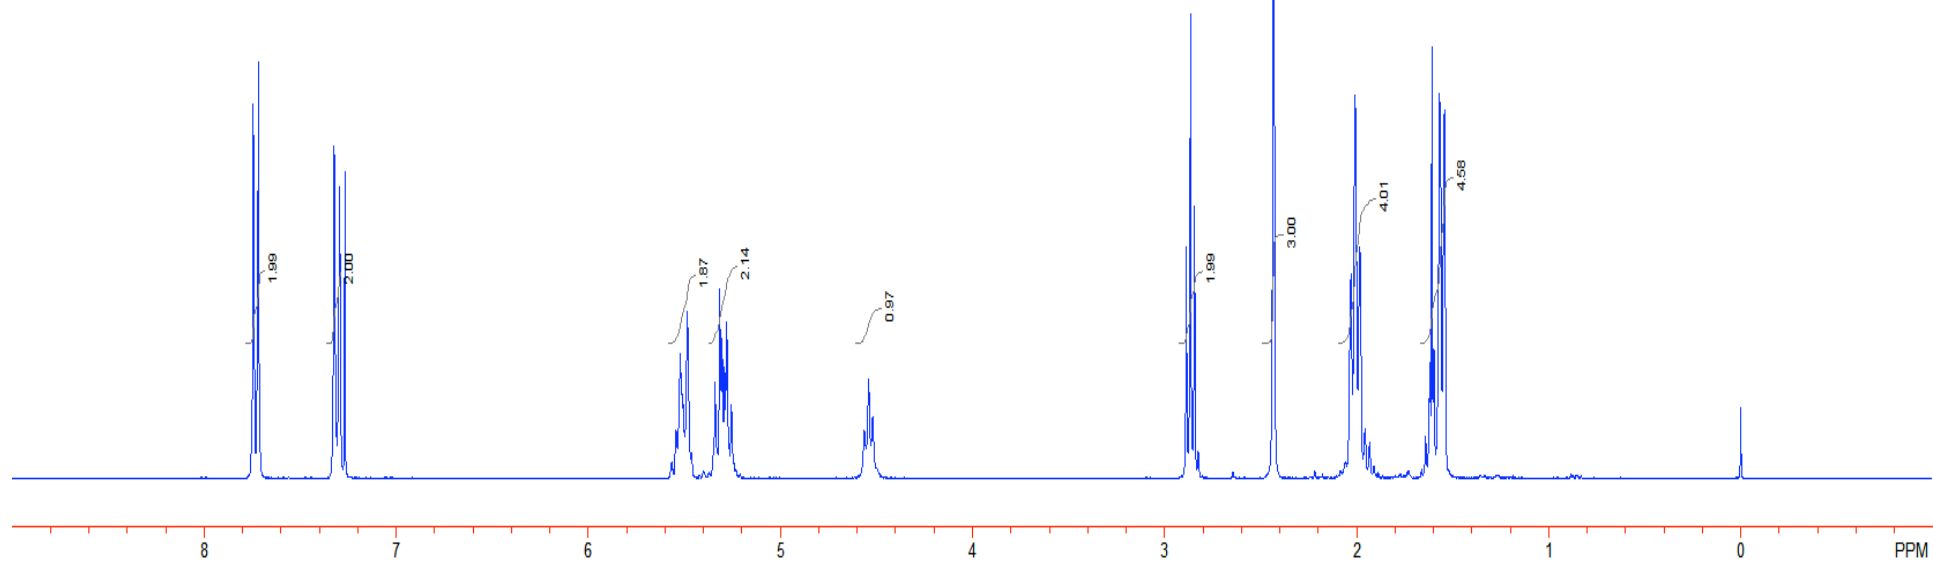

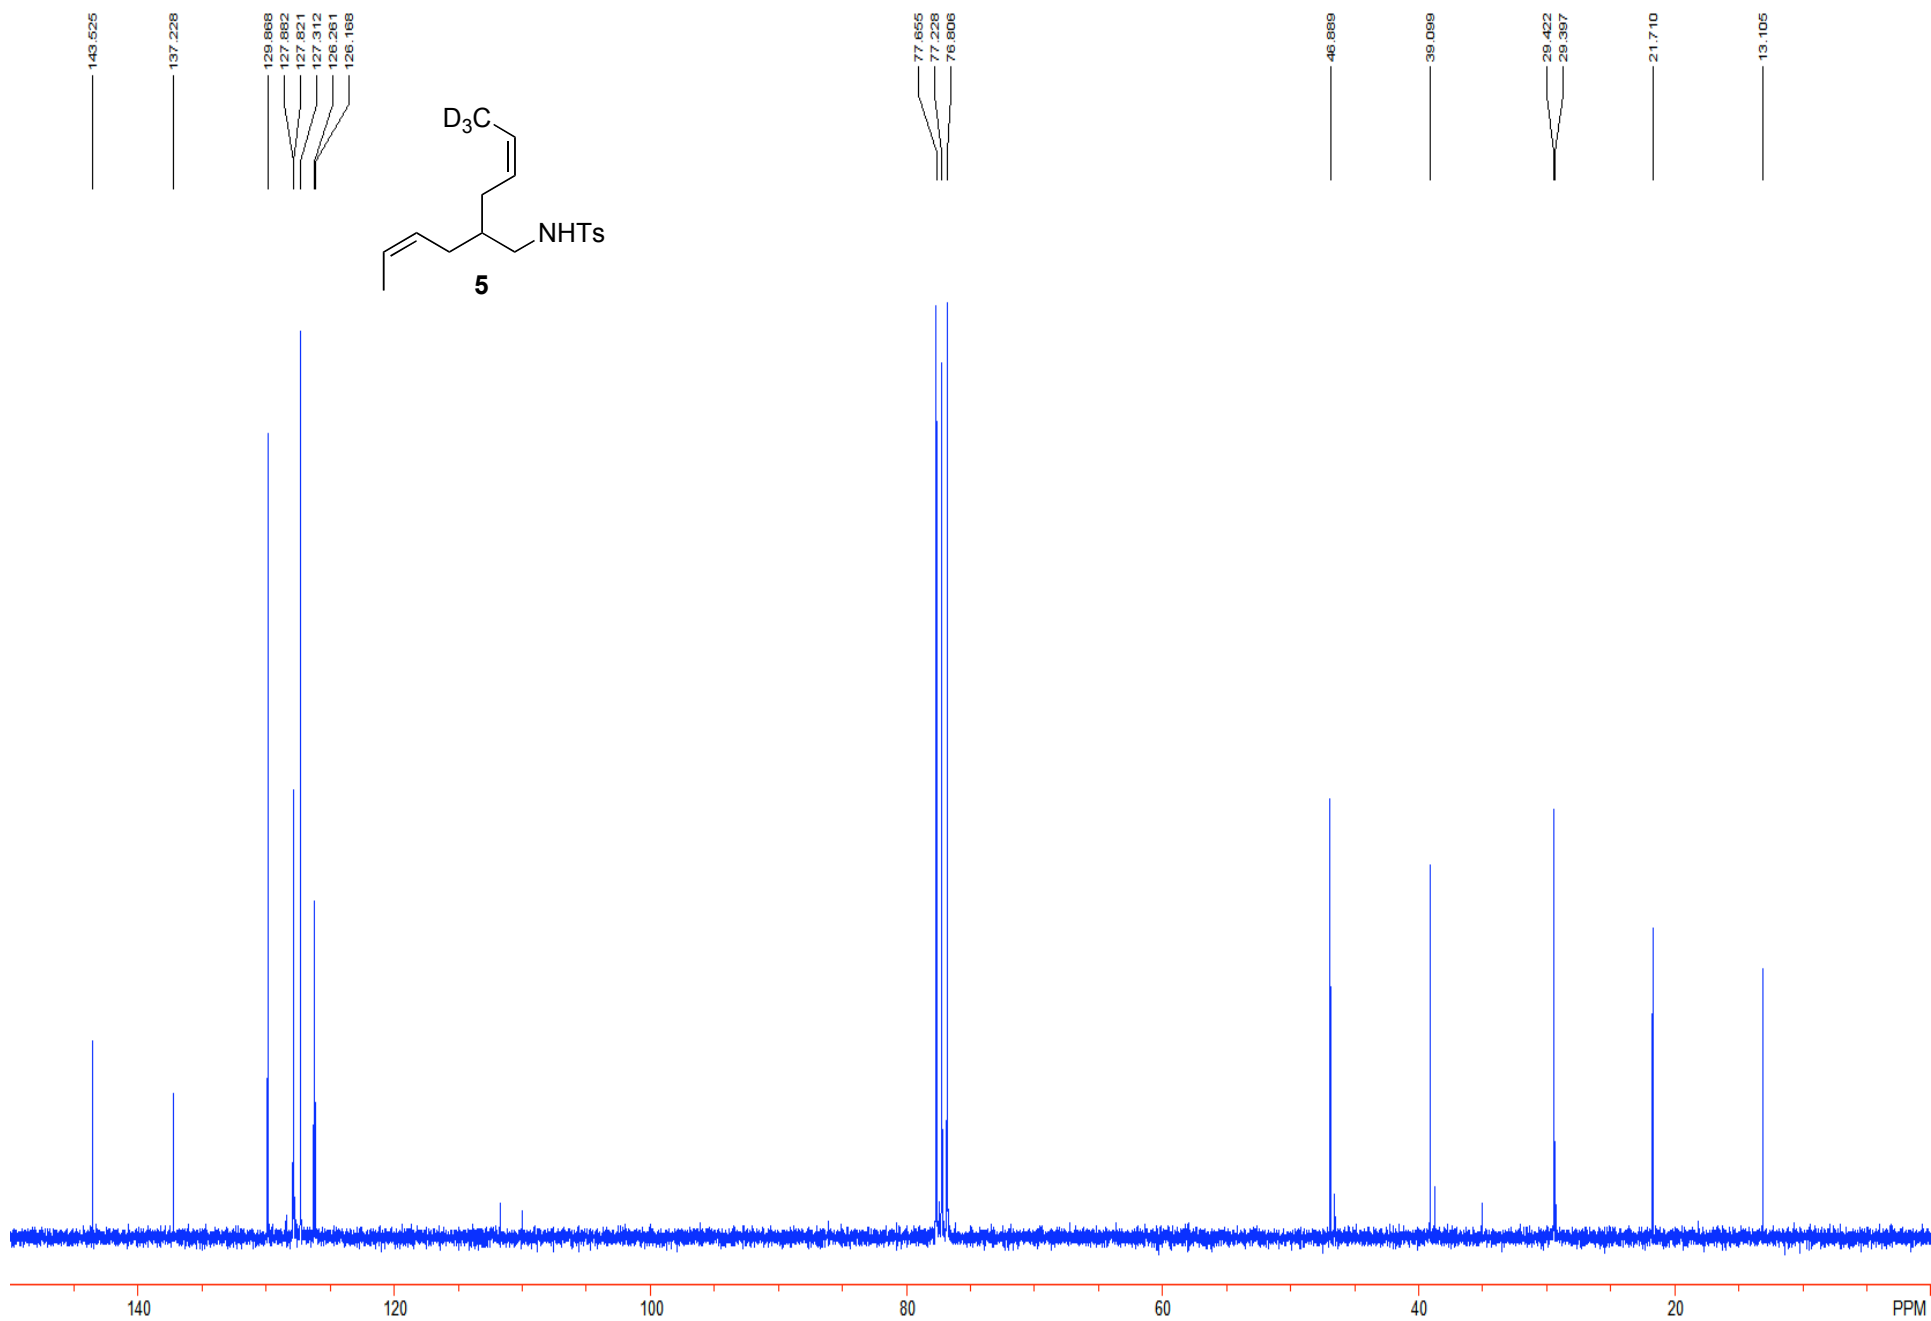

S85

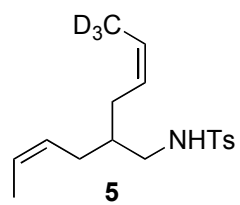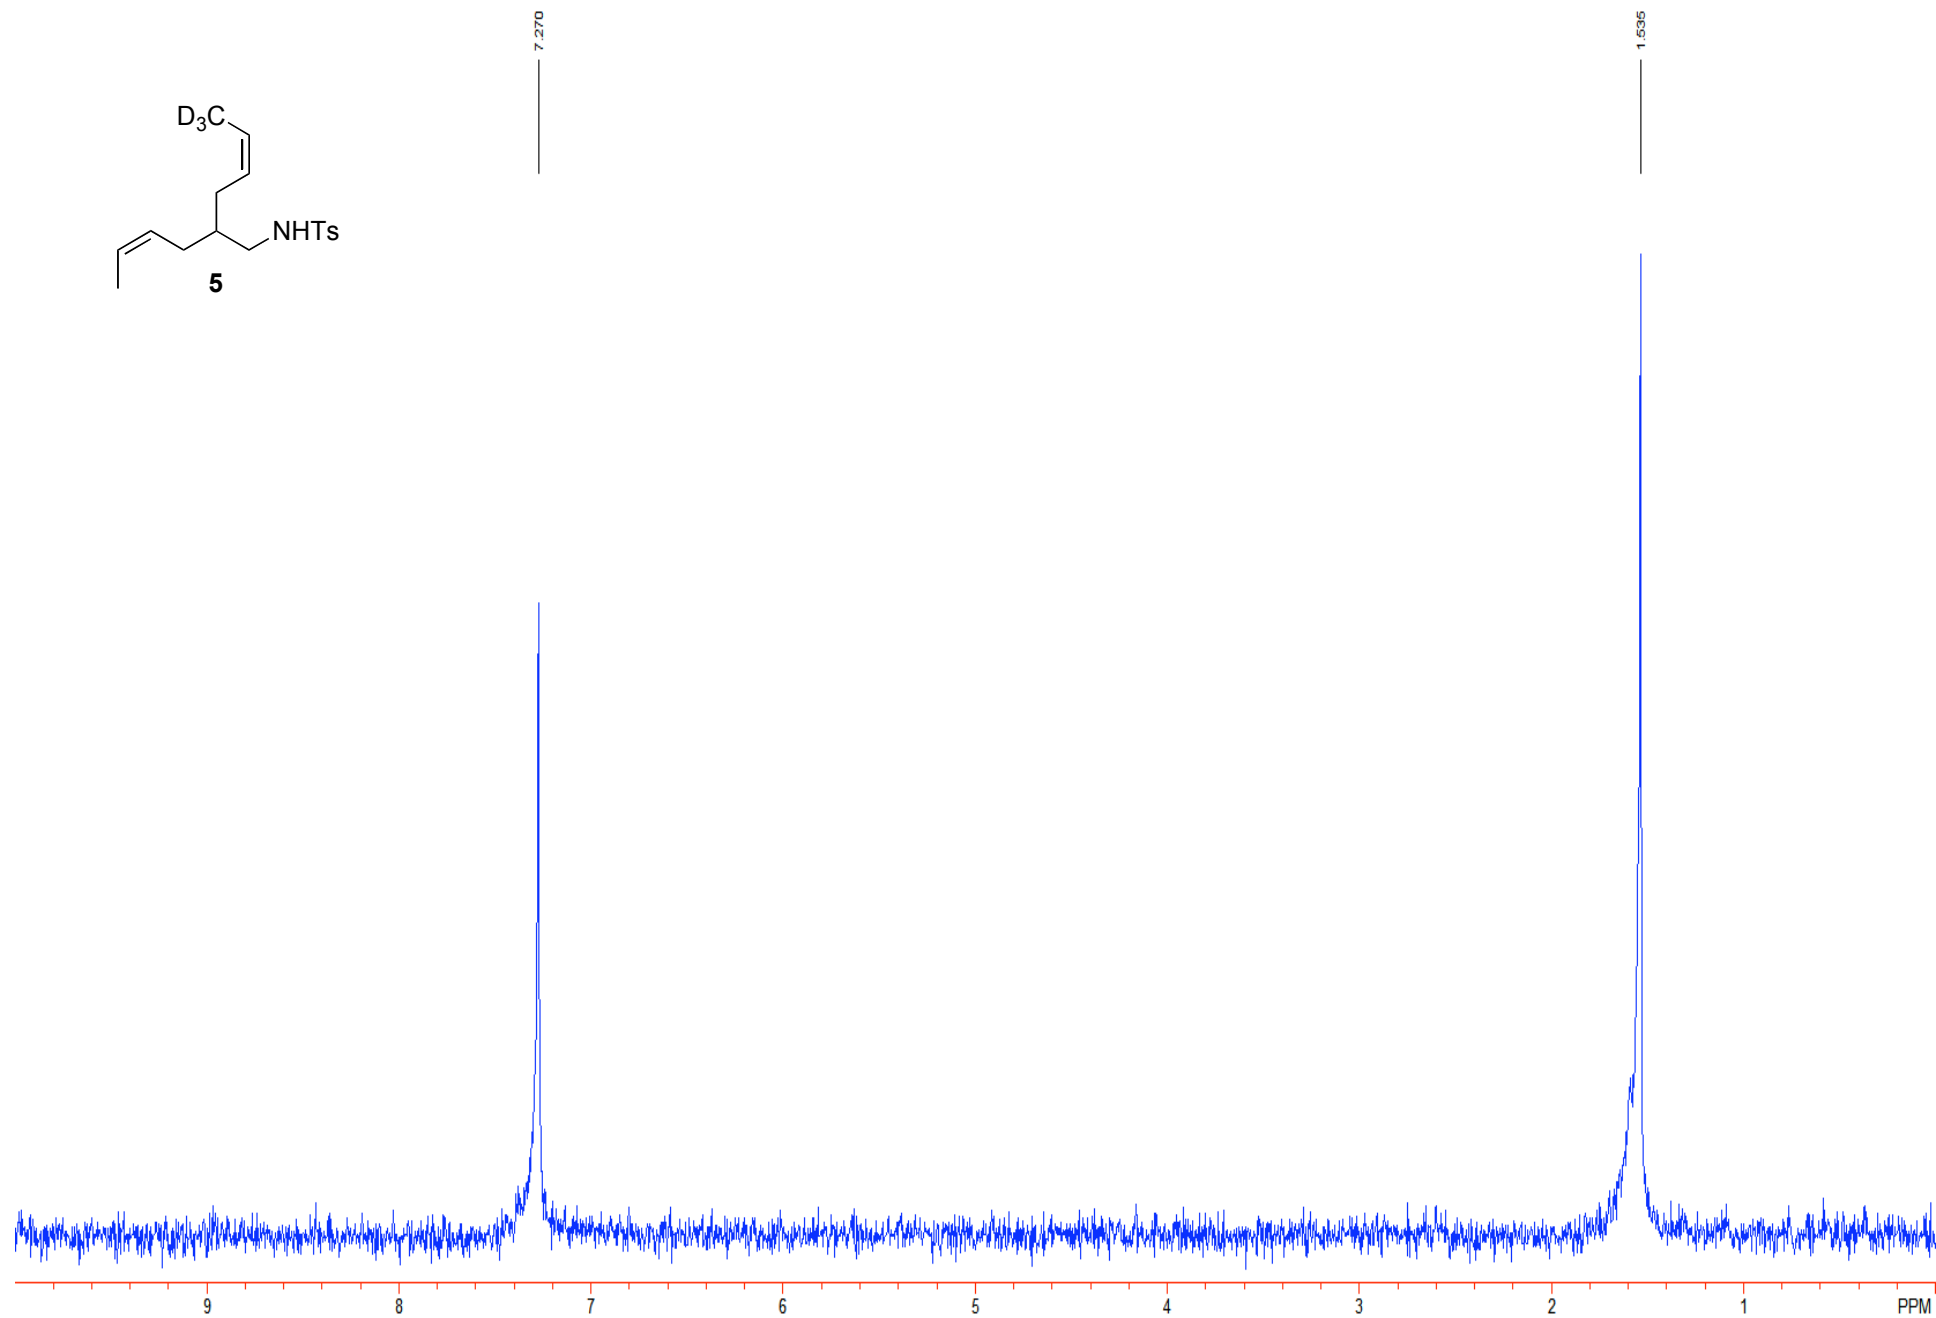

S86
